# Supplementary material for: Acetyl-CoA production by specific metabolites promotes cardiac repair after myocardial infarction via histone acetylation
Source: eLife. 2021 Dec 23;10:e60311. doi: 10.7554/eLife.60311 (PMC8763402; doi:10.7554/eLife.60311)
Supplement: Figure 1—source data 1. [file elife-60311-fig1-data1.xlsx]

## Sheet: Sheet1
Figure 1C
Sham	2C	3C	5C	8C	9C
IR	IR+2C	IR+3C	IR+5C	IR+8C	IR+9C
69.15	60.84	42.82	70.8	46.33	74.71
65.02	42.02	47.58	75.58	47.66	66.06
79.44	39.99	43.19	70.62	40.67	55.32
66.8	65.52	58	60.48	36.19	77.94
70.71	56.68	61.69	76.26	55.77	74.6
Prism8 One Way Anova Followed By Posthoc Tukey'S Multiple Comarison Test
Tukey's multiple comparisons test	Mean Diff.	95.00% CI of diff.	Significant?	Summary	Adjusted P Value
IR vs. IR+2C	17.21	0.9219 to 33.51	Yes	*	0.0341
IR vs. IR+3C	19.57	3.276 to 35.86	Yes	*	0.0123
IR vs. IR+5C	-0.524	-16.82 to 15.77	No	ns	>0.9999
IR vs. IR+8C	24.9	8.608 to 41.19	Yes	**	0.0011
IR vs. IR+9C	0.498	-15.79 to 16.79	No	ns	>0.9999
Figure 1F
IR	IR+8C 45'
51.87	48.56
75.04	50.26
58.12	55.61
58.04	38.96
74.29	33.68
Unpaired t test
P value	0.019
P value summary	*
Significantly different (P < 0.05)?	Yes
One- or two-tailed P value?	Two-tailed
t, df	t=2.929, df=8
Figure 1G
Sham	IR	IR+ 8C 45'
75.9	48.3	58.1
71.7	46.8	65.5
70.1	45	63.7
71.1	49.7	62.6
73.3	45.1	66.7
ANOVA summary
F	122.7
P value	<0.0001
P value summary	****
Significant diff. among means (P < 0.05)?	Yes
R square	0.9534
Tukey's multiple comparisons test	Mean Diff.	95.00% CI of diff.	Significant?	Summary	Adjusted P Value
Sham vs. IR	25.44	21.05 to 29.83	Yes	****	<0.0001
Sham vs. IR+ 8C 45'	9.1	4.710 to 13.49	Yes	***	0.0004
IR vs. IR+ 8C 45'	-16.34	-20.73 to -11.95	Yes	****	<0.0001
Figure 1H
Sham	IR	IR+ 8C 45'
45.8	25.3	24.4
42	24.4	24.9
40.7	23.3	35.1
41.9	26.1	34.2
43	22.6	37.5
ANOVA summary
F	29.81
P value	<0.0001
P value summary	****
Significant diff. among means (P < 0.05)?	Yes
R square	0.8324
Tukey's multiple comparisons test	Mean Diff.	95.00% CI of diff.	Significant?	Summary	Adjusted P Value
Sham vs. IR	18.34	11.94 to 24.74	Yes	****	<0.0001
Sham vs. IR+ 8C 45'	11.46	5.057 to 17.86	Yes	**	0.0012
IR vs. IR+ 8C 45'	-6.88	-13.28 to -0.4773	Yes	*	0.0352
Figure 1I
	PBS			8C
Sham	21.9574	22.4574	20.4483	27.7308	26.7308	27.7831
IR	4.89704	3.89704	5.68292	10.4292	12.0292	10.2433
Two-way ANOVA	Ordinary
Alpha	0.05
Source of Variation	% of total variation	P value	P value summary	Significant?
Interaction	0.006272	0.7928	ns	No
Row Factor	88.13	<0.0001	****	Yes
Column Factor	11.19	<0.0001	****	Yes
Tukey's multiple comparisons test	Mean Diff.	95.00% CI of diff.	Significant?	Summary	Adjusted P Value
Sham:PBS vs. Sham:8C	-5.794	-8.136 to -3.451	Yes	***	0.0002
Sham:PBS vs. IR:PBS	16.8	14.45 to 19.14	Yes	****	<0.0001
Sham:PBS vs. IR:8C	10.72	8.378 to 13.06	Yes	****	<0.0001
Sham:8C vs. IR:PBS	22.59	20.25 to 24.93	Yes	****	<0.0001
Sham:8C vs. IR:8C	16.51	14.17 to 18.86	Yes	****	<0.0001
IR:PBS vs. IR:8C	-6.075	-8.417 to -3.732	Yes	***	0.0002
Figure 1K
Sham	I/R	I/R+8C
1.06257	0.599765	1.25214
0.88934	0.485745	0.792434
1.04809	0.61516	0.870509
ANOVA summary
F	7.069
P value	0.0264
P value summary	*
Significant diff. among means (P < 0.05)?	Yes
R square	0.7021
Tukey's multiple comparisons test	Mean Diff.	95.00% CI of diff.	Significant?	Summary	Adjusted P Value
Sham vs. I/R	0.4331	0.03767 to 0.8286	Yes	*	0.0351
Sham vs. I/R+8C	0.02831	-0.3671 to 0.4237	No	ns	0.9739
I/R vs. I/R+8C	-0.4048	-0.8002 to -0.009363	Yes	*	0.0457
Figure 1M
IR	IR+ 8C 45'
44.23	19.76
34.05	24.88
31.9	36.14
51.78	32.88
50.78	25.57
Unpaired t test
P value	0.02
P value summary	*
Significantly different (P < 0.05)?	Yes
One- or two-tailed P value?	Two-tailed
t, df	t=2.898, df=8
Figure 1N
Sham	IR	IR+ 8C 45'
68.3	43.3	55.6
73.3	35.2	56.8
73.7	45.2	49.5
72.1	35.9	64
	45.9	43.6
ANOVA summary
F	31.83
P value	<0.0001
P value summary	****
Significant diff. among means (P < 0.05)?	Yes
R square	0.8527
Tukey's multiple comparisons test	Mean Diff.	95.00% CI of diff.	Significant?	Summary	Adjusted P Value
Sham vs. IR	30.75	20.34 to 41.16	Yes	****	<0.0001
Sham vs. IR+ 8C 45'	17.95	7.535 to 28.36	Yes	**	0.0019
IR vs. IR+ 8C 45'	-12.8	-22.62 to -2.981	Yes	*	0.0122
Figure 1O
Sham	IR	IR+ 8C 45'
39.5	22.6	30.3
43.5	17.9	31.2
44.1	23.5	26.3
42.9	18.2	36
	23.9	22.6
ANOVA summary
F	37
P value	<0.0001
P value summary	****
Significant diff. among means (P < 0.05)?	Yes
R square	0.8706
Tukey's multiple comparisons test	Mean Diff.	95.00% CI of diff.	Significant?	Summary	Adjusted P Value
Sham vs. IR	21.28	14.58 to 27.98	Yes	****	<0.0001
Sham vs. IR+ 8C 45'	13.22	6.518 to 19.92	Yes	***	0.0006
IR vs. IR+ 8C 45'	-8.06	-14.38 to -1.741	Yes	*	0.0139
