# Supplementary material for: Acetyl-CoA production by specific metabolites promotes cardiac repair after myocardial infarction via histone acetylation
Source: eLife. 2021 Dec 23;10:e60311. doi: 10.7554/eLife.60311 (PMC8763402; doi:10.7554/eLife.60311)
Supplement: Figure 2—source data 1. [file elife-60311-fig2-data1.xlsx]

## Sheet: Sheet1
Figure 2B	Each data point represent the average of 12 section from one heart
Sham	IR	IR+8C
	50.63	30.63
	48.9	27.46
	52.75	26.03
Unpaired t test
P value	0.0002
P value summary	***
Significantly different (P < 0.05)?	Yes
One- or two-tailed P value?	Two-tailed
t, df	t=12.93, df=4
Figure 2C
Sham	IR	IR+8C
3.37888	32.5677	11.9844
4.83482	21.3102	14.4805
8.32651	13.9824	8.73787
5.3962	22.3391	13.735
	30.9393
ANOVA summary
F	15.48
P value	0.0009
P value summary	***
Significant diff. among means (P < 0.05)?	Yes
R squared	0.7559
Tukey's multiple comparisons test	Mean Diff.	95.00% CI of diff.	Below threshold?	Summary	Adjusted P Value
Sham vs. IR	-18.74	-28.20 to -9.292	Yes	***	0.0008	A-B
Sham vs. IR+8C	-6.75	-16.71 to 3.213	No	ns	0.2012	A-C
IR vs. IR+8C	11.99	2.542 to 21.44	Yes	*	0.0149	B-C
Fiugre 2D
Sham	IR	IR+8C
0.741175	1.15056	1.03452
0.77115	1.19114	0.850077
0.63706	1.59415	0.834853
0.878902	1.47198	1.0496
	1.07131
ANOVA summary
F	12.51
P value	0.0019
P value summary	**
Significant diff. among means (P < 0.05)?	Yes
R squared	0.7144
Tukey's multiple comparisons test	Mean Diff.	95.00% CI of diff.	Below threshold?	Summary	Adjusted P Value
Sham vs. IR	-0.5388	-0.8422 to -0.2353	Yes	**	0.0017	A-B
Sham vs. IR+8C	-0.1852	-0.5050 to 0.1346	No	ns	0.2951	A-C
IR vs. IR+8C	0.3536	0.05014 to 0.6570	Yes	*	0.0238	B-C
Figure 2F
	Sham				IR
Bax	0.861531	0.809703	1.06396	1.26481	2.1578	2.2044	1.95549	2.5834
Bcl2	1.12485	0.972605	0.889763	1.01278	0.383537	0.684237	0.417712	0.606635
Bax
ANOVA summary
F	20.02
P value	0.0005
P value summary	***
Significant diff. among means (P < 0.05)?	Yes
R square	0.8165
Tukey's multiple comparisons test	Mean Diff.	95.00% CI of diff.	Significant?	Summary	Adjusted P Value
Sham vs. IR	-1.225	-1.771 to -0.6800	Yes	***	0.0004
Sham vs. IR+8C	-0.4732	-1.019 to 0.07210	No	ns	0.0887
IR vs. IR+8C	0.7521	0.2068 to 1.297	Yes	**	0.0098
Bcl2
ANOVA summary
F	16.91
P value	0.0009
P value summary	***
Significant diff. among means (P < 0.05)?	Yes
R square	0.7898
Tukey's multiple comparisons test	Mean Diff.	95.00% CI of diff.	Significant?	Summary	Adjusted P Value
Sham vs. IR	0.477	0.2472 to 0.7068	Yes	***	0.0007
Sham vs. IR+8C	0.2724	0.04259 to 0.5022	Yes	*	0.0224
IR vs. IR+8C	-0.2046	-0.4344 to 0.02520	No	ns	0.0805
Figure 2I
Sham	IR	IR+8C
0.871023	1.25625	1.20511
1.04318	1.53068	1.12159
1.0858	1.65227	1.02784
ANOVA summary
F	9.076
P value	0.0153
P value summary	*
Significant diff. among means (P < 0.05)?	Yes
R square	0.7516
Tukey's multiple comparisons test	Mean Diff.	95.00% CI of diff.	Significant?	Summary	Adjusted P Value
Sham vs. IR	-0.4797	-0.8397 to -0.1197	Yes	*	0.0152
Sham vs. IR+8C	-0.1182	-0.4782 to 0.2418	No	ns	0.5994
IR vs. IR+8C	0.3616	0.001546 to 0.7216	Yes	*	0.0492
