# Supplementary material for: Acetyl-CoA production by specific metabolites promotes cardiac repair after myocardial infarction via histone acetylation
Source: eLife. 2021 Dec 23;10:e60311. doi: 10.7554/eLife.60311 (PMC8763402; doi:10.7554/eLife.60311)
Supplement: Figure 3—source data 1. [file elife-60311-fig3-data1.xlsx]

## Sheet: Sheet1
Figure 3B
	PBS			8C			sIR			sIR+8C
Annexin+ PI-	1.47	1.57	1.93	1.63	1.75	1.94	5.24	6.48	4.87	4.48	5.41	4.46
Annexin+ PI+	10.3	11.5	10.3	9.85	10.03	10.65	23.3	19.3	28.6	12.5	16.1	13.3
total Annexin+	11.77	13.07	12.23	11.48	11.78	12.59	28.54	25.78	33.47	16.98	21.51	17.76
Two-way ANOVA	Ordinary
Alpha	0.05
Source of Variation	% of total variation	P value	P value summary	Significant?
Interaction	7.9	<0.0001	****	Yes
Row Factor	56.64	<0.0001	****	Yes
Column Factor	31.52	<0.0001	****	Yes
Tukey's multiple comparisons test	Mean Diff.	95.00% CI of diff.	Significant?	Summary	Adjusted P Value
A+ P-
PBS vs. 8C	-0.1167	-4.663 to 4.430	No	ns	0.9999
PBS vs. sIR	-3.873	-8.420 to 0.6729	No	ns	0.1146
PBS vs. sIR+8C	-3.127	-7.673 to 1.420	No	ns	0.2557
8C vs. sIR	-3.757	-8.303 to 0.7896	No	ns	0.1311
8C vs. sIR+8C	-3.01	-7.556 to 1.536	No	ns	0.286
sIR vs. sIR+8C	0.7467	-3.800 to 5.293	No	ns	0.9684
A+ P+
PBS vs. 8C	0.5233	-4.023 to 5.070	No	ns	0.9886
PBS vs. sIR	-13.03	-17.58 to -8.487	Yes	****	<0.0001
PBS vs. sIR+8C	-3.267	-7.813 to 1.280	No	ns	0.2225
8C vs. sIR	-13.56	-18.10 to -9.010	Yes	****	<0.0001
8C vs. sIR+8C	-3.79	-8.336 to 0.7562	No	ns	0.1262
sIR vs. sIR+8C	9.767	5.220 to 14.31	Yes	****	<0.0001
total A+
PBS vs. 8C	0.4067	-4.140 to 4.953	No	ns	0.9946
PBS vs. sIR	-16.91	-21.45 to -12.36	Yes	****	<0.0001
PBS vs. sIR+8C	-6.393	-10.94 to -1.847	Yes	**	0.0037
8C vs. sIR	-17.31	-21.86 to -12.77	Yes	****	<0.0001
8C vs. sIR+8C	-6.8	-11.35 to -2.254	Yes	**	0.002
sIR vs. sIR+8C	10.51	5.967 to 15.06	Yes	****	<0.0001
Figure 3C
	PBS										8C
Normoxia	1.00315	1.07021	0.926646	0.889523	1.04406	1.06642	1.13249	0.948927	1.00962	0.908956	0.90468	1.08503	1.04836	0.889523	1.04406	1.06642	1.03183	1.08956	0.815692	0.941525
sI/R	0.566241	0.604654	0.566351	0.661733	0.691945	0.50037	0.413027	0.490007	0.473723	0.442635	0.690184	0.713221	0.624603	0.789921	0.810004	0.811498	0.803808	0.763879	0.717987	0.683938
Two-way ANOVA	Ordinary
Alpha	0.05
Source of Variation	% of total variation	P value	P value summary	Significant?
Interaction	6.319	0.0004	***	Yes
Row Factor	73.45	<0.0001	****	Yes
Column Factor	5.348	0.001	***	Yes
Tukey's multiple comparisons test	Mean Diff.	95.00% CI of diff.	Significant?	Summary	Adjusted P Value
Normoxia:CTL vs. Normoxia:8C	0.008331	-0.09307 to 0.1097	No	ns	0.9961
Normoxia:CTL vs. sI/R:CTL	0.4589	0.3575 to 0.5603	Yes	****	<0.0001
Normoxia:CTL vs. sI/R:8C	0.2591	0.1577 to 0.3605	Yes	****	<0.0001
Normoxia:8C vs. sI/R:CTL	0.4506	0.3492 to 0.5520	Yes	****	<0.0001
Normoxia:8C vs. sI/R:8C	0.2508	0.1494 to 0.3522	Yes	****	<0.0001
sI/R:CTL vs. sI/R:8C	-0.1998	-0.3012 to -0.09843	Yes	****	<0.0001
Figure 3D
	PBS								8C
Normoxia	0	0	0	0	0	0	0	0	0.946684	1.01141	1.99256	0.0991339	-0.0597223	1.05227	-3.2928
I2R4	8.50168	17.5204	21.2323	7.40652	6.92995	13.1253	6.69679	8.88202	7.73132	8.71842	8.90935	3.75283	2.95855	2.95855	5.03186	1.1817
Two-way ANOVA	Ordinary
Alpha	0.05
Source of Variation	% of total variation	P value	P value summary	Significant?
Interaction	8.302	0.0114	*	Yes
Row Factor	53.45	<0.0001	****	Yes
Column Factor	7.053	0.0187	*	Yes
Tukey's multiple comparisons test	Predicted (LS) mean diff.	95.00% CI of diff.	Significant?	Summary	Adjusted P Value
Normoxia:Control vs. Normoxia:8C	-0.2499	-4.876 to 4.376	No	ns	0.9988
Normoxia:Control vs. I2R4:Control	-11.29	-15.76 to -6.818	Yes	****	<0.0001
Normoxia:Control vs. I2R4:8C	-5.155	-9.625 to -0.6861	Yes	*	0.0192
Normoxia:8C vs. I2R4:Control	-11.04	-15.66 to -6.411	Yes	****	<0.0001
Normoxia:8C vs. I2R4:8C	-4.905	-9.532 to -0.2793	Yes	*	0.0346
I2R4:Control vs. I2R4:8C	6.132	1.662 to 10.60	Yes	**	0.0044
Figure 3H
	CTL						8C
Normoxia	0.988375	1.01162	1.08933	0.890845	1.01982		1.01805	1.05398	1.12761	1.10495	1.06957	1.08917
sI/R	2.40954	2.30592	2.45362	2.79789	2.44327	2.51534	1.63941	1.569	1.7436	1.31603	1.18901	1.38348
Two-way ANOVA	Ordinary
Alpha	0.05
Source of Variation	% of total variation	P value	P value summary	Significant?
Interaction	19.91	<0.0001	****	Yes
Row Factor	59.32	<0.0001	****	Yes
Column Factor	14.67	<0.0001	****	Yes
Tukey's multiple comparisons test	Predicted (LS) mean diff.	95.00% CI of diff.	Significant?	Summary	Adjusted P Value
Normoxia:CTL vs. Normoxia:8C	-0.07722	-0.3214 to 0.1670	No	ns	0.8105
Normoxia:CTL vs. sI/R:CTL	-1.488	-1.732 to -1.243	Yes	****	<0.0001
Normoxia:CTL vs. sI/R:8C	-0.4734	-0.7176 to -0.2292	Yes	***	0.0002
Normoxia:8C vs. sI/R:CTL	-1.41	-1.643 to -1.178	Yes	****	<0.0001
Normoxia:8C vs. sI/R:8C	-0.3962	-0.6290 to -0.1634	Yes	***	0.0007
sI/R:CTL vs. sI/R:8C	1.014	0.7813 to 1.247	Yes	****	<0.0001
