# Supplementary material for: Acetyl-CoA production by specific metabolites promotes cardiac repair after myocardial infarction via histone acetylation
Source: eLife. 2021 Dec 23;10:e60311. doi: 10.7554/eLife.60311 (PMC8763402; doi:10.7554/eLife.60311)
Supplement: Figure 4—source data 1. [file elife-60311-fig4-data1.xlsx]

## Sheet: Sheet1
Figure 4A
	PBS			8C
Normoxia	4.15454	3.95786	3.8123	4.95844	6.28857	5.6318
sI/R	1.60723	1.15499	2.23392	2.9206	2.5067	3.47562
ANOVA summary
F	33.45
P value	<0.0001
P value summary	****
Significant diff. among means (P < 0.05)?	Yes
R square	0.9262
Tukey's multiple comparisons test	Mean Diff.	95.00% CI of diff.	Significant?	Summary	Adjusted P Value
PBS vs. 8C	-1.651	-2.959 to -0.3438	Yes	*	0.0157
PBS vs. sIR	2.31	1.002 to 3.617	Yes	**	0.0021
PBS vs. sIR+8C	0.9939	-0.3137 to 2.302	No	ns	0.1473
8C vs. sIR	3.961	2.653 to 5.269	Yes	****	<0.0001
8C vs. sIR+8C	2.645	1.338 to 3.953	Yes	***	0.0009
sIR vs. sIR+8C	-1.316	-2.623 to -0.007971	Yes	*	0.0486
Figure 4B
	PBS			8C
Normoxia	0.958764	1.03837	1.00287	1.35027	1.20689	1.29388
sI/R	0.497594	0.512886	0.428462	0.674341	0.681785	0.666663
Tukey's multiple comparisons test	Mean Diff.	95.00% CI of diff.	Significant?	Summary	Adjusted P Value
Normoxia:PBS vs. Normoxia:8C	-0.2837	-0.4069 to -0.1604	Yes	***	0.0004
Normoxia:PBS vs. sI/R:PBS	0.5204	0.3971 to 0.6436	Yes	****	<0.0001
Normoxia:PBS vs. sI/R:8C	0.3257	0.2025 to 0.4490	Yes	***	0.0001
Normoxia:8C vs. sI/R:PBS	0.804	0.6808 to 0.9273	Yes	****	<0.0001
Normoxia:8C vs. sI/R:8C	0.6094	0.4862 to 0.7327	Yes	****	<0.0001
sI/R:PBS vs. sI/R:8C	-0.1946	-0.3179 to -0.07136	Yes	**	0.0043
Figure 4C
	PBS			8C
Normoxia	0.950422	1.04958	1	1.0663	1.20153	1.13366
sI/R	0.852237	0.908034	0.807727	1.09262	1.13366	1.0531
Source of Variation	% of total variation	P value	P value summary	Significant?
Interaction	5.028	0.1291	ns	No
Row Factor	16.08	0.0164	*	Yes
Column Factor	64.85	0.0003	***	Yes
Tukey's multiple comparisons test	Mean Diff.	95.00% CI of diff.	Significant?	Summary
Normoxia:PBS vs. Normoxia:8C	-0.1338	-0.2721 to 0.004397	No	ns
Normoxia:PBS vs. sI/R:PBS	0.144	0.005774 to 0.2822	Yes	*
Normoxia:PBS vs. sI/R:8C	-0.09313	-0.2314 to 0.04510	No	ns
Normoxia:8C vs. sI/R:PBS	0.2778	0.1396 to 0.4161	Yes	***
Normoxia:8C vs. sI/R:8C	0.0407	-0.09752 to 0.1789	No	ns
sI/R:PBS vs. sI/R:8C	-0.2371	-0.3754 to -0.09890	Yes	**
Figure 4D
	PBS			8C
Normoxia	0.942294	0.985269	1.07244	1.12873	1.09889	1.2041
sI/R	0.535306	0.477996	0.504346	0.647857	0.608849	0.694488
Source of Variation	% of total variation	P value	P value summary	Significant?
Interaction	3.438e-05	0.9918	ns	No
Row Factor	89.88	<0.0001	****	Yes
Column Factor	7.665	0.0011	**	Yes
Tukey's multiple comparisons test	Mean Diff.	95.00% CI of diff.	Significant?	Summary	Adjusted P Value
Normoxia:PBS vs. Normoxia:8C	-0.1439	-0.2746 to -0.01318	Yes	*	0.0318
Normoxia:PBS vs. sI/R:PBS	0.4941	0.3634 to 0.6248	Yes	****	<0.0001
Normoxia:PBS vs. sI/R:8C	0.3496	0.2189 to 0.4803	Yes	***	0.0001
Normoxia:8C vs. sI/R:PBS	0.638	0.5073 to 0.7687	Yes	****	<0.0001
Normoxia:8C vs. sI/R:8C	0.4935	0.3628 to 0.6242	Yes	****	<0.0001
sI/R:PBS vs. sI/R:8C	-0.1445	-0.2752 to -0.01379	Yes	*	0.0312
Figure 4E
	PBS			8C
Normoxia	0.958764	1.03837	1.00287	1.22913	1.25423	1.32402
sI/R	0.562282	0.512886	0.508759	0.674341	0.841092	0.859863
Source of Variation	% of total variation	P value	P value summary	Significant?
Interaction	0.002322	0.9423	ns	No
Row Factor	73.5	<0.0001	****	Yes
Column Factor	23.16	<0.0001	****	Yes
Tukey's multiple comparisons test	Mean Diff.	95.00% CI of diff.	Significant?	Summary	Adjusted P Value
Normoxia:PBS vs. Normoxia:8C	-0.2691	-0.4310 to -0.1073	Yes	**	0.0031
Normoxia:PBS vs. sI/R:PBS	0.472	0.3102 to 0.6339	Yes	****	<0.0001
Normoxia:PBS vs. sI/R:8C	0.2082	0.04640 to 0.3701	Yes	*	0.0142
Normoxia:8C vs. sI/R:PBS	0.7411	0.5793 to 0.9030	Yes	****	<0.0001
Normoxia:8C vs. sI/R:8C	0.4774	0.3155 to 0.6392	Yes	****	<0.0001
sI/R:PBS vs. sI/R:8C	-0.2638	-0.4256 to -0.1020	Yes	**	0.0035
Figure 4G
	PBS			8C			sIR			sIR+8C
HO1	1	1	1	1.92041	1.30163	1.68359	1.92041	1.535	1.90545	2.27292	2.28362	2.33681
NQO1	1	1	1	1.52006	1.46962	1.33699	1.13342	1.75513	1.70104	2.24488	2.5826	2.22752
SOD2	1	1	1	1.13342	1.20248	1.24809	1.30084	1.2288	1.28776	1.60905	1.85961	1.78351
Tukey's multiple comparisons test	Mean Diff.	95.00% CI of diff.	Significant?	Summary	Adjusted P Value
HO1
PBS vs. 8C	-0.6352	-1.135 to -0.1351	Yes	*	0.0152
PBS vs. sIR	-0.787	-1.287 to -0.2869	Yes	**	0.0044
PBS vs. sIR+8C	-1.298	-1.798 to -0.7977	Yes	***	0.0002
8C vs. sIR	-0.1517	-0.6518 to 0.3483	No	ns	0.7688
8C vs. sIR+8C	-0.6626	-1.163 to -0.1625	Yes	*	0.0121
sIR vs. sIR+8C	-0.5108	-1.011 to -0.01074	Yes	*	0.0454
NQO1
PBS vs. 8C	-0.4422	-0.9775 to 0.09303	No	ns	0.1096
PBS vs. sIR	-0.5299	-1.065 to 0.005387	No	ns	0.0523
PBS vs. sIR+8C	-1.352	-1.887 to -0.8164	Yes	***	0.0002
8C vs. sIR	-0.08764	-0.6229 to 0.4476	No	ns	0.9508
8C vs. sIR+8C	-0.9094	-1.445 to -0.3742	Yes	**	0.0027
sIR vs. sIR+8C	-0.8218	-1.357 to -0.2866	Yes	**	0.0051
SOD2
PBS vs. 8C	-0.1947	-0.5711 to 0.1818	No	ns	0.4958
PBS vs. sIR	-0.2725	-0.6489 to 0.1040	No	ns	0.2172
PBS vs. sIR+8C	-0.7507	-1.127 to -0.3742	Yes	****	<0.0001
8C vs. sIR	-0.0778	-0.4543 to 0.2987	No	ns	0.94
8C vs. sIR+8C	-0.5561	-0.9325 to -0.1796	Yes	**	0.0023
sIR vs. sIR+8C	-0.4783	-0.8547 to -0.1018	Yes	**	0.0092
Figure 4H
	Normoxia						Normoxia + 8C						sI/R						sI/R + 8C
HO1	0.999475	1.05656	1.02349	0.89446	0.963738	1.07332	1.26081	1.24524	1.27941	1.01148	1.03915	1.04357	1.54675	1.81289	1.64903	1.4882	1.33062	1.20399	2.58808	3.67857	2.62312	1.92485	2.21864	2.32952
NQO1	0.979246	1.02701	0.99434	0.992116	0.965496	1.04397	1.33499	1.19221	1.35759	1.22183	1.20315	1.19323	1.26319	1.12506	1.22166	1.36382	1.20357	1.07654	1.72497	2.84529	2.04318	1.75678	1.81673	2.07407
SOD2	0.931723	1.11595	0.961765	0.935152	1.04106	1.02717	1.05717	1.0729	0.962683	1.17587	0.958193	1.03	0.882921	0.77284	0.765548	0.891816	0.794607	0.877869	1.40895	1.18017	1.11679	1.22722	1.10028	1.36269
HO1
Tukey's multiple comparisons test	Mean Diff.	95.00% CI of diff.	Significant?	Summary	Adjusted P Value
Normoxia vs. Normoxia + 8C	-0.1448	-0.6771 to 0.3875	No	ns	0.8708
Normoxia vs. sI/R	-0.5034	-1.036 to 0.02888	No	ns	0.0679
Normoxia vs. sI/R + 8C	-1.559	-2.091 to -1.026	Yes	****	<0.0001
Normoxia + 8C vs. sI/R	-0.3586	-0.8909 to 0.1737	No	ns	0.2654
Normoxia + 8C vs. sI/R + 8C	-1.414	-1.946 to -0.8816	Yes	****	<0.0001
sI/R vs. sI/R + 8C	-1.055	-1.588 to -0.5229	Yes	***	0.0001
NQO1
Tukey's multiple comparisons test	Mean Diff.	95.00% CI of diff.	Significant?	Summary	Adjusted P Value
Normoxia vs. Normoxia + 8C	-0.2501	-0.6048 to 0.1045	No	ns	0.2307
Normoxia vs. sI/R	-0.2086	-0.5633 to 0.1460	No	ns	0.3767
Normoxia vs. sI/R + 8C	-1.043	-1.398 to -0.6885	Yes	****	<0.0001
Normoxia + 8C vs. sI/R	0.04153	-0.3131 to 0.3962	No	ns	0.9875
Normoxia + 8C vs. sI/R + 8C	-0.793	-1.148 to -0.4384	Yes	****	<0.0001
sI/R vs. sI/R + 8C	-0.8345	-1.189 to -0.4799	Yes	****	<0.0001
SOD2
Tukey's multiple comparisons test	Mean Diff.	95.00% CI of diff.	Significant?	Summary	Adjusted P Value
Normoxia vs. Normoxia + 8C	-0.04067	-0.1843 to 0.1030	No	ns	0.857
Normoxia vs. sI/R	0.1712	0.02756 to 0.3148	Yes	*	0.016
Normoxia vs. sI/R + 8C	-0.2305	-0.3742 to -0.08690	Yes	**	0.0012
Normoxia + 8C vs. sI/R	0.2119	0.06822 to 0.3555	Yes	**	0.0027
Normoxia + 8C vs. sI/R + 8C	-0.1899	-0.3335 to -0.04623	Yes	**	0.0071
sI/R vs. sI/R + 8C	-0.4017	-0.5454 to -0.2581	Yes	****	<0.0001
