# Supplementary material for: Acetyl-CoA production by specific metabolites promotes cardiac repair after myocardial infarction via histone acetylation
Source: eLife. 2021 Dec 23;10:e60311. doi: 10.7554/eLife.60311 (PMC8763402; doi:10.7554/eLife.60311)
Supplement: Figure 5—source data 1. [file elife-60311-fig5-data1.xlsx]

## Sheet: Sheet1
Figure 5A
	PBS			8C			MCAD KD			MCAD KD+8C
Normoxia	0.969152	1.03085	1	1.2357	1.34388	1.29589	0.738822	0.913237	0.691284	1.1708	0.733306	0.910366
sI/R	0.386608	0.352574	0.421437	0.686638	0.612275	0.722664	0.347518	0.188767	0.35599	0.332919	0.39919	0.394351
Tukey's multiple comparisons test	Mean Diff.	95.00% CI of diff.	Significant?	Summary	Adjusted P Value
Normoxia:PBS vs. Normoxia:8C	-0.2918	-0.5755 to -0.008134	Yes	*	0.0415
Normoxia:PBS vs. Normoxia:MCAD KD	0.2189	-0.06480 to 0.5026	No	ns	0.2009
Normoxia:PBS vs. Normoxia:MCAD KD+8C	0.06184	-0.2218 to 0.3455	No	ns	0.9934
Normoxia:PBS vs. sI/R:PBS	0.6131	0.3294 to 0.8968	Yes	****	<0.0001
Normoxia:PBS vs. sI/R:8C	0.3261	0.04245 to 0.6098	Yes	*	0.0186
Normoxia:PBS vs. sI/R:MCAD KD	0.7026	0.4189 to 0.9863	Yes	****	<0.0001
Normoxia:PBS vs. sI/R:MCAD KD+8C	0.6245	0.3408 to 0.9082	Yes	****	<0.0001
Normoxia:8C vs. Normoxia:MCAD KD	0.5107	0.2270 to 0.7944	Yes	***	0.0003
Normoxia:8C vs. Normoxia:MCAD KD+8C	0.3537	0.06997 to 0.6373	Yes	**	0.0097
Normoxia:8C vs. sI/R:PBS	0.9049	0.6213 to 1.189	Yes	****	<0.0001
Normoxia:8C vs. sI/R:8C	0.618	0.3343 to 0.9016	Yes	****	<0.0001
Normoxia:8C vs. sI/R:MCAD KD	0.9944	0.7107 to 1.278	Yes	****	<0.0001
Normoxia:8C vs. sI/R:MCAD KD+8C	0.9163	0.6326 to 1.200	Yes	****	<0.0001
Normoxia:MCAD KD vs. Normoxia:MCAD KD+8C	-0.157	-0.4407 to 0.1266	No	ns	0.5595
Normoxia:MCAD KD vs. sI/R:PBS	0.3942	0.1106 to 0.6779	Yes	**	0.0037
Normoxia:MCAD KD vs. sI/R:8C	0.1073	-0.1764 to 0.3909	No	ns	0.8827
Normoxia:MCAD KD vs. sI/R:MCAD KD	0.4837	0.2000 to 0.7674	Yes	***	0.0005
Normoxia:MCAD KD vs. sI/R:MCAD KD+8C	0.4056	0.1219 to 0.6893	Yes	**	0.0028
Normoxia:MCAD KD+8C vs. sI/R:PBS	0.5513	0.2676 to 0.8350	Yes	***	0.0001
Normoxia:MCAD KD+8C vs. sI/R:8C	0.2643	-0.01939 to 0.5480	No	ns	0.0774
Normoxia:MCAD KD+8C vs. sI/R:MCAD KD	0.6407	0.3570 to 0.9244	Yes	****	<0.0001
Normoxia:MCAD KD+8C vs. sI/R:MCAD KD+8C	0.5627	0.2790 to 0.8464	Yes	****	<0.0001
sI/R:PBS vs. sI/R:8C	-0.287	-0.5707 to -0.003298	Yes	*	0.0464
sI/R:PBS vs. sI/R:MCAD KD	0.08945	-0.1942 to 0.3731	No	ns	0.9496
sI/R:PBS vs. sI/R:MCAD KD+8C	0.01139	-0.2723 to 0.2951	No	ns	>0.9999
sI/R:8C vs. sI/R:MCAD KD	0.3764	0.09275 to 0.6601	Yes	**	0.0056
sI/R:8C vs. sI/R:MCAD KD+8C	0.2984	0.01468 to 0.5821	Yes	*	0.0356
sI/R:MCAD KD vs. sI/R:MCAD KD+8C	-0.07806	-0.3617 to 0.2056	No	ns	0.9751
Figure 5B
	CTL						CTL+8C						MCAD						MCAD+8C
Normoxia	0.0746842	0.096101	0.0637013	0.0598572	0.0631521		0.088413	0.07743	0.0982976	0.0560132	0.0620538	0.0510708	0.0876168	0.0992991	0.117991	0.100467	0.101636	0.0922897	0.0971719	0.114195	0.0922295	0.0856398	0.104311	0.116941
sI/R	0.224667	0.196	0.192	0.172	0.221333		0.115496	0.106667	0.152	0.109281	0.116	0.103789	0.186161	0.224602	0.192751	0.202087	0.227897	0.224053	0.191104	0.205931	0.185612	0.175728	0.188907	0.177924
Tukey's multiple comparisons test	Predicted (LS) mean diff.	95.00% CI of diff.	Significant?	Summary	Adjusted P Value
Normoxia:CTL vs. Normoxia:CTL+8C	-0.0007139	-0.03173 to 0.03030	No	ns	>0.9999
Normoxia:CTL vs. Normoxia:MCAD	-0.02838	-0.05940 to 0.002633	No	ns	0.0938
Normoxia:CTL vs. Normoxia:MCAD+8C	-0.03025	-0.06127 to 0.0007678	No	ns	0.0604
Normoxia:CTL vs. sI/R:CTL	-0.1297	-0.1621 to -0.09730	Yes	****	<0.0001
Normoxia:CTL vs. sI/R:CTL+8C	-0.04571	-0.07672 to -0.01469	Yes	***	0.0008
Normoxia:CTL vs. sI/R:MCAD	-0.1381	-0.1691 to -0.1071	Yes	****	<0.0001
Normoxia:CTL vs. sI/R:MCAD+8C	-0.116	-0.1471 to -0.08502	Yes	****	<0.0001
Normoxia:CTL+8C vs. Normoxia:MCAD	-0.02767	-0.05724 to 0.001903	No	ns	0.081
Normoxia:CTL+8C vs. Normoxia:MCAD+8C	-0.02954	-0.05911 to 3.828e-005	No	ns	0.0505
Normoxia:CTL+8C vs. sI/R:CTL	-0.129	-0.1600 to -0.09797	Yes	****	<0.0001
Normoxia:CTL+8C vs. sI/R:CTL+8C	-0.04499	-0.07457 to -0.01542	Yes	***	0.0005
Normoxia:CTL+8C vs. sI/R:MCAD	-0.1374	-0.1670 to -0.1078	Yes	****	<0.0001
Normoxia:CTL+8C vs. sI/R:MCAD+8C	-0.1153	-0.1449 to -0.08575	Yes	****	<0.0001
Normoxia:MCAD vs. Normoxia:MCAD+8C	-0.001865	-0.03144 to 0.02771	No	ns	>0.9999
Normoxia:MCAD vs. sI/R:CTL	-0.1013	-0.1323 to -0.07030	Yes	****	<0.0001
Normoxia:MCAD vs. sI/R:CTL+8C	-0.01732	-0.04690 to 0.01225	No	ns	0.5738
Normoxia:MCAD vs. sI/R:MCAD	-0.1097	-0.1393 to -0.08014	Yes	****	<0.0001
Normoxia:MCAD vs. sI/R:MCAD+8C	-0.08765	-0.1172 to -0.05808	Yes	****	<0.0001
Normoxia:MCAD+8C vs. sI/R:CTL	-0.09945	-0.1305 to -0.06844	Yes	****	<0.0001
Normoxia:MCAD+8C vs. sI/R:CTL+8C	-0.01546	-0.04503 to 0.01412	No	ns	0.7023
Normoxia:MCAD+8C vs. sI/R:MCAD	-0.1078	-0.1374 to -0.07827	Yes	****	<0.0001
Normoxia:MCAD+8C vs. sI/R:MCAD+8C	-0.08579	-0.1154 to -0.05621	Yes	****	<0.0001
sI/R:CTL vs. sI/R:CTL+8C	0.08399	0.05298 to 0.1150	Yes	****	<0.0001
sI/R:CTL vs. sI/R:MCAD	-0.008392	-0.03941 to 0.02262	No	ns	0.9873
sI/R:CTL vs. sI/R:MCAD+8C	0.01367	-0.01735 to 0.04468	No	ns	0.846
sI/R:CTL+8C vs. sI/R:MCAD	-0.09239	-0.1220 to -0.06281	Yes	****	<0.0001
sI/R:CTL+8C vs. sI/R:MCAD+8C	-0.07033	-0.09990 to -0.04076	Yes	****	<0.0001
sI/R:MCAD vs. sI/R:MCAD+8C	0.02206	-0.007516 to 0.05163	No	ns	0.2748
Figure 5D
	CTL			CTL+8C			MCAD			MCAD+8C
Normoxia	0.988375	1.01162	1	1.10495	1.06957	1.08917	1.15386	1.1597	1.17407	1.06358	0.903786	1.03409
sI/R	2.79789	2.44327	2.51534	1.31603	1.18901	1.38348	2.7176	2.66902	2.54241	1.97098	2.17851	2.48262
Tukey's multiple comparisons test	Mean Diff.	95.00% CI of diff.	Significant?	Summary	Adjusted P Value
Normoxia:CTL vs. Normoxia:CTL+8C	-0.0879	-0.4442 to 0.2684	No	ns	0.9864
Normoxia:CTL vs. Normoxia:MCAD	-0.1625	-0.5188 to 0.1937	No	ns	0.7553
Normoxia:CTL vs. Normoxia:MCAD+8C	-0.0004843	-0.3568 to 0.3558	No	ns	>0.9999
Normoxia:CTL vs. sI/R:CTL	-1.585	-1.942 to -1.229	Yes	****	<0.0001
Normoxia:CTL vs. sI/R:CTL+8C	-0.2962	-0.6524 to 0.06009	No	ns	0.1427
Normoxia:CTL vs. sI/R:MCAD	-1.643	-1.999 to -1.287	Yes	****	<0.0001
Normoxia:CTL vs. sI/R:MCAD+8C	-1.211	-1.567 to -0.8544	Yes	****	<0.0001
Normoxia:CTL+8C vs. Normoxia:MCAD	-0.07465	-0.4309 to 0.2816	No	ns	0.9948
Normoxia:CTL+8C vs. Normoxia:MCAD+8C	0.08741	-0.2689 to 0.4437	No	ns	0.9868
Normoxia:CTL+8C vs. sI/R:CTL	-1.498	-1.854 to -1.141	Yes	****	<0.0001
Normoxia:CTL+8C vs. sI/R:CTL+8C	-0.2083	-0.5646 to 0.1480	No	ns	0.4969
Normoxia:CTL+8C vs. sI/R:MCAD	-1.555	-1.911 to -1.199	Yes	****	<0.0001
Normoxia:CTL+8C vs. sI/R:MCAD+8C	-1.123	-1.479 to -0.7665	Yes	****	<0.0001
Normoxia:MCAD vs. Normoxia:MCAD+8C	0.1621	-0.1942 to 0.5183	No	ns	0.7578
Normoxia:MCAD vs. sI/R:CTL	-1.423	-1.779 to -1.067	Yes	****	<0.0001
Normoxia:MCAD vs. sI/R:CTL+8C	-0.1336	-0.4899 to 0.2226	No	ns	0.8867
Normoxia:MCAD vs. sI/R:MCAD	-1.48	-1.837 to -1.124	Yes	****	<0.0001
Normoxia:MCAD vs. sI/R:MCAD+8C	-1.048	-1.404 to -0.6919	Yes	****	<0.0001
Normoxia:MCAD+8C vs. sI/R:CTL	-1.585	-1.941 to -1.229	Yes	****	<0.0001
Normoxia:MCAD+8C vs. sI/R:CTL+8C	-0.2957	-0.6520 to 0.06058	No	ns	0.1439
Normoxia:MCAD+8C vs. sI/R:MCAD	-1.643	-1.999 to -1.286	Yes	****	<0.0001
Normoxia:MCAD+8C vs. sI/R:MCAD+8C	-1.21	-1.566 to -0.8539	Yes	****	<0.0001
sI/R:CTL vs. sI/R:CTL+8C	1.289	0.9331 to 1.646	Yes	****	<0.0001
sI/R:CTL vs. sI/R:MCAD	-0.05751	-0.4138 to 0.2988	No	ns	0.999
sI/R:CTL vs. sI/R:MCAD+8C	0.3748	0.01853 to 0.7311	Yes	*	0.0356
sI/R:CTL+8C vs. sI/R:MCAD	-1.347	-1.703 to -0.9906	Yes	****	<0.0001
sI/R:CTL+8C vs. sI/R:MCAD+8C	-0.9145	-1.271 to -0.5583	Yes	****	<0.0001
sI/R:MCAD vs. sI/R:MCAD+8C	0.4323	0.07604 to 0.7886	Yes	*	0.0121
Figure 5E
HO1	CTL			CTL+8C			MCAD KD			MCAD KD +8C
Normoxia	1	1	1	1.22	1.15088	1.42318	0.804871	0.700032	0.784294	0.999945	1.01109	0.957296
sI/R	1.5	1.40085	1.44801	1.94275	1.88	2.06046	1.15883	1.01762	1.06587	0.86	0.822363	0.94281
NQO1	CTL			CTL+8C			MCAD KD			MCAD KD +8C
Normoxia	1	1	1	0.931737	1.25323	1.15861	0.731889	0.608848	0.66053	0.704942	0.88903	0.839373
sI/R	0.943431	1.16915	1.11946	1.2673	1.52933	1.35693	0.851505	1.04167	0.958165	0.95472	0.727542	0.87073
HO1
Tukey's multiple comparisons test	Mean Diff.	95.00% CI of diff.	Significant?	Summary	Adjusted P Value
Normoxia:CTL vs. Normoxia:CTL+8C	-0.2647	-0.4737 to -0.05569	Yes	**	0.0085
Normoxia:CTL vs. Normoxia:MCAD KD	0.2369	0.02794 to 0.4459	Yes	*	0.0207
Normoxia:CTL vs. Normoxia:MCAD KD +8C	0.01056	-0.1984 to 0.2195	No	ns	>0.9999
Normoxia:CTL vs. sI/R:CTL	-0.4496	-0.6586 to -0.2406	Yes	****	<0.0001
Normoxia:CTL vs. sI/R:CTL+8C	-0.9611	-1.170 to -0.7521	Yes	****	<0.0001
Normoxia:CTL vs. sI/R:MCAD KD	-0.08077	-0.2898 to 0.1282	No	ns	0.8712
Normoxia:CTL vs. sI/R:MCAD KD +8C	0.1249	-0.08405 to 0.3339	No	ns	0.4709
Normoxia:CTL+8C vs. Normoxia:MCAD KD	0.5016	0.2926 to 0.7106	Yes	****	<0.0001
Normoxia:CTL+8C vs. Normoxia:MCAD KD +8C	0.2752	0.06625 to 0.4842	Yes	**	0.006
Normoxia:CTL+8C vs. sI/R:CTL	-0.1849	-0.3939 to 0.02406	No	ns	0.1035
Normoxia:CTL+8C vs. sI/R:CTL+8C	-0.6964	-0.9054 to -0.4874	Yes	****	<0.0001
Normoxia:CTL+8C vs. sI/R:MCAD KD	0.1839	-0.02508 to 0.3929	No	ns	0.1066
Normoxia:CTL+8C vs. sI/R:MCAD KD +8C	0.3896	0.1806 to 0.5986	Yes	***	0.0002
Normoxia:MCAD KD vs. Normoxia:MCAD KD +8C	-0.2264	-0.4354 to -0.01738	Yes	*	0.029
Normoxia:MCAD KD vs. sI/R:CTL	-0.6866	-0.8955 to -0.4776	Yes	****	<0.0001
Normoxia:MCAD KD vs. sI/R:CTL+8C	-1.198	-1.407 to -0.9890	Yes	****	<0.0001
Normoxia:MCAD KD vs. sI/R:MCAD KD	-0.3177	-0.5267 to -0.1087	Yes	**	0.0015
Normoxia:MCAD KD vs. sI/R:MCAD KD +8C	-0.112	-0.3210 to 0.09700	No	ns	0.5959
Normoxia:MCAD KD +8C vs. sI/R:CTL	-0.4602	-0.6692 to -0.2512	Yes	****	<0.0001
Normoxia:MCAD KD +8C vs. sI/R:CTL+8C	-0.9716	-1.181 to -0.7626	Yes	****	<0.0001
Normoxia:MCAD KD +8C vs. sI/R:MCAD KD	-0.09133	-0.3003 to 0.1177	No	ns	0.7904
Normoxia:MCAD KD +8C vs. sI/R:MCAD KD +8C	0.1144	-0.09461 to 0.3234	No	ns	0.5724
sI/R:CTL vs. sI/R:CTL+8C	-0.5114	-0.7204 to -0.3025	Yes	****	<0.0001
sI/R:CTL vs. sI/R:MCAD KD	0.3688	0.1599 to 0.5778	Yes	***	0.0003
sI/R:CTL vs. sI/R:MCAD KD +8C	0.5746	0.3656 to 0.7836	Yes	****	<0.0001
sI/R:CTL+8C vs. sI/R:MCAD KD	0.8803	0.6713 to 1.089	Yes	****	<0.0001
sI/R:CTL+8C vs. sI/R:MCAD KD +8C	1.086	0.8770 to 1.295	Yes	****	<0.0001
sI/R:MCAD KD vs. sI/R:MCAD KD +8C	0.2057	-0.003279 to 0.4147	No	ns	0.0553
NQO1
Tukey's multiple comparisons test	Mean Diff.	95.00% CI of diff.	Significant?	Summary	Adjusted P Value
Normoxia:CTL vs. Normoxia:CTL+8C	-0.1145	-0.4214 to 0.1923	No	ns	0.8891
Normoxia:CTL vs. Normoxia:MCAD KD	0.3329	0.02605 to 0.6398	Yes	*	0.0286
Normoxia:CTL vs. Normoxia:MCAD KD +8C	0.1889	-0.1180 to 0.4957	No	ns	0.4369
Normoxia:CTL vs. sI/R:CTL	-0.07735	-0.3842 to 0.2295	No	ns	0.9846
Normoxia:CTL vs. sI/R:CTL+8C	-0.3845	-0.6914 to -0.07766	Yes	**	0.0093
Normoxia:CTL vs. sI/R:MCAD KD	0.04955	-0.2573 to 0.3564	No	ns	0.999
Normoxia:CTL vs. sI/R:MCAD KD +8C	0.149	-0.1579 to 0.4559	No	ns	0.6984
Normoxia:CTL+8C vs. Normoxia:MCAD KD	0.4474	0.1406 to 0.7543	Yes	**	0.0023
Normoxia:CTL+8C vs. Normoxia:MCAD KD +8C	0.3034	-0.003448 to 0.6103	No	ns	0.0538
Normoxia:CTL+8C vs. sI/R:CTL	0.03718	-0.2697 to 0.3440	No	ns	0.9998
Normoxia:CTL+8C vs. sI/R:CTL+8C	-0.27	-0.5769 to 0.03686	No	ns	0.1067
Normoxia:CTL+8C vs. sI/R:MCAD KD	0.1641	-0.1428 to 0.4709	No	ns	0.5983
Normoxia:CTL+8C vs. sI/R:MCAD KD +8C	0.2635	-0.04333 to 0.5704	No	ns	0.1212
Normoxia:MCAD KD vs. Normoxia:MCAD KD +8C	-0.144	-0.4509 to 0.1628	No	ns	0.7303
Normoxia:MCAD KD vs. sI/R:CTL	-0.4103	-0.7171 to -0.1034	Yes	**	0.0053
Normoxia:MCAD KD vs. sI/R:CTL+8C	-0.7174	-1.024 to -0.4106	Yes	****	<0.0001
Normoxia:MCAD KD vs. sI/R:MCAD KD	-0.2834	-0.5902 to 0.02350	No	ns	0.0815
Normoxia:MCAD KD vs. sI/R:MCAD KD +8C	-0.1839	-0.4908 to 0.1229	No	ns	0.468
Normoxia:MCAD KD +8C vs. sI/R:CTL	-0.2662	-0.5731 to 0.04062	No	ns	0.1149
Normoxia:MCAD KD +8C vs. sI/R:CTL+8C	-0.5734	-0.8803 to -0.2665	Yes	***	0.0002
Normoxia:MCAD KD +8C vs. sI/R:MCAD KD	-0.1393	-0.4462 to 0.1675	No	ns	0.7593
Normoxia:MCAD KD +8C vs. sI/R:MCAD KD +8C	-0.03988	-0.3467 to 0.2670	No	ns	0.9997
sI/R:CTL vs. sI/R:CTL+8C	-0.3072	-0.6140 to -0.0003122	Yes	*	0.0497
sI/R:CTL vs. sI/R:MCAD KD	0.1269	-0.1800 to 0.4338	No	ns	0.8302
sI/R:CTL vs. sI/R:MCAD KD +8C	0.2264	-0.08051 to 0.5332	No	ns	0.2417
sI/R:CTL+8C vs. sI/R:MCAD KD	0.4341	0.1272 to 0.7409	Yes	**	0.0031
sI/R:CTL+8C vs. sI/R:MCAD KD +8C	0.5335	0.2267 to 0.8404	Yes	***	0.0004
sI/R:MCAD KD vs. sI/R:MCAD KD +8C	0.09945	-0.2074 to 0.4063	No	ns	0.9423
Figure 5F
HO1	CTL			CTL+8C			MCAD KD			MCAD KD +8C
Normoxia	1.21238	0.919327	0.897206	1.18652	1.15245	1.34185	1.23818	1.39486	1.60012	2.20013	1.54017	1.67
sI/R	1.87712	1.9987	1.86909	3.1037	3.78593	3.40916	2.05684	1.51024	1.97616	2.71211	2.66411	2.78574
NQO1	CTL			CTL+8C			MCAD KD			MCAD KD +8C
Normoxia	0.993955	1.21269	0.829629	1.27751	1.38655	1.14818	1.38268	1.4002	1.51097	2.02316	2.15555	1.6176
sI/R	1.84338	1.49031	1.66634	3.18127	2.95448	3.45364	1.6543	1.73741	1.30885	1.82	1.72936	2.15817
MCAD	CTL			CTL+8C			MCAD KD			MCAD KD +8C
Normoxia	1.06168	1.04186	0.904062	1.25657	1.27	1.31833	0.309699	0.296233	0.336145	0.445046	0.390471	0.437476
sI/R	0.924636	0.931083	0.926593	1.67086	1.53367	1.56532	0.331851	0.256777	0.288547	0.381378	0.501757	0.444919
HO1
Tukey's multiple comparisons test	Mean Diff.	95.00% CI of diff.	Significant?	Summary	Adjusted P Value
Normoxia:CTL vs. Normoxia:CTL+8C	-0.2173	-0.8566 to 0.4220	No	ns	0.9275
Normoxia:CTL vs. Normoxia:MCAD KD	-0.4014	-1.041 to 0.2379	No	ns	0.414
Normoxia:CTL vs. Normoxia:MCAD KD +8C	-0.7938	-1.433 to -0.1545	Yes	*	0.01
Normoxia:CTL vs. sI/R:CTL	-0.9053	-1.545 to -0.2660	Yes	**	0.0031
Normoxia:CTL vs. sI/R:CTL+8C	-2.423	-3.063 to -1.784	Yes	****	<0.0001
Normoxia:CTL vs. sI/R:MCAD KD	-0.8381	-1.477 to -0.1988	Yes	**	0.0063
Normoxia:CTL vs. sI/R:MCAD KD +8C	-1.711	-2.350 to -1.072	Yes	****	<0.0001
Normoxia:CTL+8C vs. Normoxia:MCAD KD	-0.1841	-0.8234 to 0.4552	No	ns	0.9683
Normoxia:CTL+8C vs. Normoxia:MCAD KD +8C	-0.5765	-1.216 to 0.06283	No	ns	0.0933
Normoxia:CTL+8C vs. sI/R:CTL	-0.688	-1.327 to -0.04870	Yes	*	0.0303
Normoxia:CTL+8C vs. sI/R:CTL+8C	-2.206	-2.845 to -1.567	Yes	****	<0.0001
Normoxia:CTL+8C vs. sI/R:MCAD KD	-0.6208	-1.260 to 0.01852	No	ns	0.0603
Normoxia:CTL+8C vs. sI/R:MCAD KD +8C	-1.494	-2.133 to -0.8544	Yes	****	<0.0001
Normoxia:MCAD KD vs. Normoxia:MCAD KD +8C	-0.3924	-1.032 to 0.2469	No	ns	0.4404
Normoxia:MCAD KD vs. sI/R:CTL	-0.5039	-1.143 to 0.1354	No	ns	0.1831
Normoxia:MCAD KD vs. sI/R:CTL+8C	-2.022	-2.661 to -1.383	Yes	****	<0.0001
Normoxia:MCAD KD vs. sI/R:MCAD KD	-0.4367	-1.076 to 0.2026	No	ns	0.3198
Normoxia:MCAD KD vs. sI/R:MCAD KD +8C	-1.31	-1.949 to -0.6703	Yes	****	<0.0001
Normoxia:MCAD KD +8C vs. sI/R:CTL	-0.1115	-0.7509 to 0.5278	No	ns	0.9983
Normoxia:MCAD KD +8C vs. sI/R:CTL+8C	-1.629	-2.269 to -0.9902	Yes	****	<0.0001
Normoxia:MCAD KD +8C vs. sI/R:MCAD KD	-0.04431	-0.6836 to 0.5950	No	ns	>0.9999
Normoxia:MCAD KD +8C vs. sI/R:MCAD KD +8C	-0.9172	-1.557 to -0.2779	Yes	**	0.0027
sI/R:CTL vs. sI/R:CTL+8C	-1.518	-2.157 to -0.8786	Yes	****	<0.0001
sI/R:CTL vs. sI/R:MCAD KD	0.06722	-0.5721 to 0.7065	No	ns	>0.9999
sI/R:CTL vs. sI/R:MCAD KD +8C	-0.8057	-1.445 to -0.1664	Yes	**	0.0088
sI/R:CTL+8C vs. sI/R:MCAD KD	1.585	0.9459 to 2.225	Yes	****	<0.0001
sI/R:CTL+8C vs. sI/R:MCAD KD +8C	0.7123	0.07295 to 1.352	Yes	*	0.0236
sI/R:MCAD KD vs. sI/R:MCAD KD +8C	-0.8729	-1.512 to -0.2336	Yes	**	0.0043
NQO1
Tukey's multiple comparisons test	Mean Diff.	95.00% CI of diff.	Significant?	Summary	Adjusted P Value
Normoxia:CTL vs. Normoxia:CTL+8C	-0.2587	-0.8336 to 0.3163	No	ns	0.7671
Normoxia:CTL vs. Normoxia:MCAD KD	-0.4192	-0.9941 to 0.1557	No	ns	0.2529
Normoxia:CTL vs. Normoxia:MCAD KD +8C	-0.92	-1.495 to -0.3451	Yes	***	0.0009
Normoxia:CTL vs. sI/R:CTL	-0.6546	-1.230 to -0.07964	Yes	*	0.02
Normoxia:CTL vs. sI/R:CTL+8C	-2.184	-2.759 to -1.609	Yes	****	<0.0001
Normoxia:CTL vs. sI/R:MCAD KD	-0.5548	-1.130 to 0.02018	No	ns	0.0627
Normoxia:CTL vs. sI/R:MCAD KD +8C	-0.8904	-1.465 to -0.3155	Yes	**	0.0013
Normoxia:CTL+8C vs. Normoxia:MCAD KD	-0.1605	-0.7355 to 0.4144	No	ns	0.9731
Normoxia:CTL+8C vs. Normoxia:MCAD KD +8C	-0.6614	-1.236 to -0.08641	Yes	*	0.0185
Normoxia:CTL+8C vs. sI/R:CTL	-0.3959	-0.9709 to 0.1790	No	ns	0.3111
Normoxia:CTL+8C vs. sI/R:CTL+8C	-1.926	-2.501 to -1.351	Yes	****	<0.0001
Normoxia:CTL+8C vs. sI/R:MCAD KD	-0.2961	-0.8710 to 0.2788	No	ns	0.6388
Normoxia:CTL+8C vs. sI/R:MCAD KD +8C	-0.6318	-1.207 to -0.05682	Yes	*	0.0261
Normoxia:MCAD KD vs. Normoxia:MCAD KD +8C	-0.5008	-1.076 to 0.07413	No	ns	0.1126
Normoxia:MCAD KD vs. sI/R:CTL	-0.2354	-0.8103 to 0.3395	No	ns	0.8368
Normoxia:MCAD KD vs. sI/R:CTL+8C	-1.765	-2.340 to -1.190	Yes	****	<0.0001
Normoxia:MCAD KD vs. sI/R:MCAD KD	-0.1356	-0.7105 to 0.4394	No	ns	0.9895
Normoxia:MCAD KD vs. sI/R:MCAD KD +8C	-0.4712	-1.046 to 0.1037	No	ns	0.1529
Normoxia:MCAD KD +8C vs. sI/R:CTL	0.2654	-0.3095 to 0.8404	No	ns	0.745
Normoxia:MCAD KD +8C vs. sI/R:CTL+8C	-1.264	-1.839 to -0.6894	Yes	****	<0.0001
Normoxia:MCAD KD +8C vs. sI/R:MCAD KD	0.3653	-0.2097 to 0.9402	No	ns	0.4006
Normoxia:MCAD KD +8C vs. sI/R:MCAD KD +8C	0.02959	-0.5453 to 0.6045	No	ns	>0.9999
sI/R:CTL vs. sI/R:CTL+8C	-1.53	-2.105 to -0.9548	Yes	****	<0.0001
sI/R:CTL vs. sI/R:MCAD KD	0.09983	-0.4751 to 0.6748	No	ns	0.9983
sI/R:CTL vs. sI/R:MCAD KD +8C	-0.2358	-0.8108 to 0.3391	No	ns	0.8356
sI/R:CTL+8C vs. sI/R:MCAD KD	1.63	1.055 to 2.205	Yes	****	<0.0001
sI/R:CTL+8C vs. sI/R:MCAD KD +8C	1.294	0.7190 to 1.869	Yes	****	<0.0001
sI/R:MCAD KD vs. sI/R:MCAD KD +8C	-0.3357	-0.9106 to 0.2393	No	ns	0.4985
MCAD
Tukey's multiple comparisons test	Mean Diff.	95.00% CI of diff.	Significant?	Summary	Adjusted P Value
Normoxia:CTL vs. Normoxia:CTL+8C	-0.2791	-0.4202 to -0.1380	Yes	****	<0.0001
Normoxia:CTL vs. Normoxia:MCAD KD	0.6885	0.5474 to 0.8296	Yes	****	<0.0001
Normoxia:CTL vs. Normoxia:MCAD KD +8C	0.5782	0.4371 to 0.7193	Yes	****	<0.0001
Normoxia:CTL vs. sI/R:CTL	0.0751	-0.06600 to 0.2162	No	ns	0.6034
Normoxia:CTL vs. sI/R:CTL+8C	-0.5874	-0.7285 to -0.4463	Yes	****	<0.0001
Normoxia:CTL vs. sI/R:MCAD KD	0.7101	0.5690 to 0.8512	Yes	****	<0.0001
Normoxia:CTL vs. sI/R:MCAD KD +8C	0.5598	0.4188 to 0.7009	Yes	****	<0.0001
Normoxia:CTL+8C vs. Normoxia:MCAD KD	0.9676	0.8265 to 1.109	Yes	****	<0.0001
Normoxia:CTL+8C vs. Normoxia:MCAD KD +8C	0.8573	0.7162 to 0.9984	Yes	****	<0.0001
Normoxia:CTL+8C vs. sI/R:CTL	0.3542	0.2131 to 0.4953	Yes	****	<0.0001
Normoxia:CTL+8C vs. sI/R:CTL+8C	-0.3083	-0.4494 to -0.1672	Yes	****	<0.0001
Normoxia:CTL+8C vs. sI/R:MCAD KD	0.9892	0.8481 to 1.130	Yes	****	<0.0001
Normoxia:CTL+8C vs. sI/R:MCAD KD +8C	0.8389	0.6979 to 0.9800	Yes	****	<0.0001
Normoxia:MCAD KD vs. Normoxia:MCAD KD +8C	-0.1103	-0.2514 to 0.03079	No	ns	0.1898
Normoxia:MCAD KD vs. sI/R:CTL	-0.6134	-0.7545 to -0.4723	Yes	****	<0.0001
Normoxia:MCAD KD vs. sI/R:CTL+8C	-1.276	-1.417 to -1.135	Yes	****	<0.0001
Normoxia:MCAD KD vs. sI/R:MCAD KD	0.02163	-0.1195 to 0.1627	No	ns	0.9993
Normoxia:MCAD KD vs. sI/R:MCAD KD +8C	-0.1287	-0.2698 to 0.01243	No	ns	0.0876
Normoxia:MCAD KD +8C vs. sI/R:CTL	-0.5031	-0.6442 to -0.3620	Yes	****	<0.0001
Normoxia:MCAD KD +8C vs. sI/R:CTL+8C	-1.166	-1.307 to -1.025	Yes	****	<0.0001
Normoxia:MCAD KD +8C vs. sI/R:MCAD KD	0.1319	-0.009155 to 0.2730	No	ns	0.0757
Normoxia:MCAD KD +8C vs. sI/R:MCAD KD +8C	-0.01835	-0.1594 to 0.1227	No	ns	0.9997
sI/R:CTL vs. sI/R:CTL+8C	-0.6625	-0.8036 to -0.5214	Yes	****	<0.0001
sI/R:CTL vs. sI/R:MCAD KD	0.635	0.4940 to 0.7761	Yes	****	<0.0001
sI/R:CTL vs. sI/R:MCAD KD +8C	0.4848	0.3437 to 0.6258	Yes	****	<0.0001
sI/R:CTL+8C vs. sI/R:MCAD KD	1.298	1.156 to 1.439	Yes	****	<0.0001
sI/R:CTL+8C vs. sI/R:MCAD KD +8C	1.147	1.006 to 1.288	Yes	****	<0.0001
sI/R:MCAD KD vs. sI/R:MCAD KD +8C	-0.1503	-0.2914 to -0.009199	Yes	*	0.0326
