# Supplementary material for: Acetyl-CoA production by specific metabolites promotes cardiac repair after myocardial infarction via histone acetylation
Source: eLife. 2021 Dec 23;10:e60311. doi: 10.7554/eLife.60311 (PMC8763402; doi:10.7554/eLife.60311)
Supplement: Figure 6—source data 1. [file elife-60311-fig6-data1.xlsx]

## Sheet: Sheet1
Figure 6A
	PBS			8C			Kat2a KD			Kat2a KD+8C
Normoxia	0.996426	1.00357	1	1.35027	1.26689	1.26	0.783764	0.752134	0.79103	0.912605	0.62793	0.903358
sI/R	0.452706	0.348518	0.366071	0.773053	0.581016	0.673391	0.340522	0.162842	0.278384	0.30424	0.239798	0.36
Tukey's multiple comparisons test	Mean Diff.	95.00% CI of diff.	Significant?	Summary	Adjusted P Value
Normoxia:PBS vs. Normoxia:8C	-0.2924	-0.5229 to -0.06184	Yes	**	0.0084
Normoxia:PBS vs. Normoxia:Kat2a KD	0.2244	-0.006193 to 0.4549	No	ns	0.0595
Normoxia:PBS vs. Normoxia:Kat2a KD+8C	0.1854	-0.04518 to 0.4159	No	ns	0.1673
Normoxia:PBS vs. sI/R:PBS	0.6109	0.3804 to 0.8415	Yes	****	<0.0001
Normoxia:PBS vs. sI/R:8C	0.3242	0.09363 to 0.5547	Yes	**	0.0033
Normoxia:PBS vs. sI/R:Kat2a KD	0.7394	0.5089 to 0.9700	Yes	****	<0.0001
Normoxia:PBS vs. sI/R:Kat2a KD+8C	0.6987	0.4681 to 0.9292	Yes	****	<0.0001
Normoxia:8C vs. Normoxia:Kat2a KD	0.5167	0.2862 to 0.7473	Yes	****	<0.0001
Normoxia:8C vs. Normoxia:Kat2a KD+8C	0.4778	0.2472 to 0.7083	Yes	****	<0.0001
Normoxia:8C vs. sI/R:PBS	0.9033	0.6727 to 1.134	Yes	****	<0.0001
Normoxia:8C vs. sI/R:8C	0.6166	0.3860 to 0.8471	Yes	****	<0.0001
Normoxia:8C vs. sI/R:Kat2a KD	1.032	0.8013 to 1.262	Yes	****	<0.0001
Normoxia:8C vs. sI/R:Kat2a KD+8C	0.991	0.7605 to 1.222	Yes	****	<0.0001
Normoxia:Kat2a KD vs. Normoxia:Kat2a KD+8C	-0.03899	-0.2695 to 0.1916	No	ns	0.9986
Normoxia:Kat2a KD vs. sI/R:PBS	0.3865	0.1560 to 0.6171	Yes	***	0.0006
Normoxia:Kat2a KD vs. sI/R:8C	0.09982	-0.1307 to 0.3304	No	ns	0.7975
Normoxia:Kat2a KD vs. sI/R:Kat2a KD	0.5151	0.2845 to 0.7456	Yes	****	<0.0001
Normoxia:Kat2a KD vs. sI/R:Kat2a KD+8C	0.4743	0.2437 to 0.7048	Yes	****	<0.0001
Normoxia:Kat2a KD+8C vs. sI/R:PBS	0.4255	0.1950 to 0.6561	Yes	***	0.0002
Normoxia:Kat2a KD+8C vs. sI/R:8C	0.1388	-0.09174 to 0.3694	No	ns	0.4626
Normoxia:Kat2a KD+8C vs. sI/R:Kat2a KD	0.554	0.3235 to 0.7846	Yes	****	<0.0001
Normoxia:Kat2a KD+8C vs. sI/R:Kat2a KD+8C	0.5133	0.2827 to 0.7438	Yes	****	<0.0001
sI/R:PBS vs. sI/R:8C	-0.2867	-0.5173 to -0.05617	Yes	**	0.0099
sI/R:PBS vs. sI/R:Kat2a KD	0.1285	-0.1020 to 0.3591	No	ns	0.5517
sI/R:PBS vs. sI/R:Kat2a KD+8C	0.08775	-0.1428 to 0.3183	No	ns	0.8793
sI/R:8C vs. sI/R:Kat2a KD	0.4152	0.1847 to 0.6458	Yes	***	0.0003
sI/R:8C vs. sI/R:Kat2a KD+8C	0.3745	0.1439 to 0.6050	Yes	***	0.0008
sI/R:Kat2a KD vs. sI/R:Kat2a KD+8C	-0.04076	-0.2713 to 0.1898	No	ns	0.9982
Figure 6B
	CTL			8c			GCN5			8C+GCN5KD
Normoxia	0	0	0	-0.563893	0.493443	0.970163	3.22043	4.82525	2.03551	2.19873	3.01883	5.15687
sIR	12.3707	9.54211	15.6504	3.23284	2.20878	5.65045	14.6353	18.1679	19.5039	12.1641	11.9351	14.8362
Tukey's multiple comparisons test	Mean Diff.	95.00% CI of diff.	Significant?	Summary	Adjusted P Value
Normoxia:CTL vs. Normoxia:8c	-0.2999	-5.426 to 4.826	No	ns	>0.9999
Normoxia:CTL vs. Normoxia:GCN5	-3.36	-8.487 to 1.766	No	ns	0.365
Normoxia:CTL vs. Normoxia:8C+GCN5KD	-3.458	-8.584 to 1.668	No	ns	0.3332
Normoxia:CTL vs. sIR:CTL	-12.52	-17.65 to -7.395	Yes	****	<0.0001
Normoxia:CTL vs. sIR:8c	-3.697	-8.823 to 1.429	No	ns	0.2635
Normoxia:CTL vs. sIR:GCN5	-17.44	-22.56 to -12.31	Yes	****	<0.0001
Normoxia:CTL vs. sIR:8C+GCN5KD	-12.98	-18.10 to -7.852	Yes	****	<0.0001
Normoxia:8c vs. Normoxia:GCN5	-3.06	-8.187 to 2.066	No	ns	0.4724
Normoxia:8c vs. Normoxia:8C+GCN5KD	-3.158	-8.284 to 1.968	No	ns	0.4359
Normoxia:8c vs. sIR:CTL	-12.22	-17.35 to -7.095	Yes	****	<0.0001
Normoxia:8c vs. sIR:8c	-3.397	-8.524 to 1.729	No	ns	0.3527
Normoxia:8c vs. sIR:GCN5	-17.14	-22.26 to -12.01	Yes	****	<0.0001
Normoxia:8c vs. sIR:8C+GCN5KD	-12.68	-17.80 to -7.552	Yes	****	<0.0001
Normoxia:GCN5 vs. Normoxia:8C+GCN5KD	-0.09775	-5.224 to 5.028	No	ns	>0.9999
Normoxia:GCN5 vs. sIR:CTL	-9.161	-14.29 to -4.035	Yes	***	0.0003
Normoxia:GCN5 vs. sIR:8c	-0.337	-5.463 to 4.789	No	ns	>0.9999
Normoxia:GCN5 vs. sIR:GCN5	-14.08	-19.20 to -8.949	Yes	****	<0.0001
Normoxia:GCN5 vs. sIR:8C+GCN5KD	-9.618	-14.74 to -4.492	Yes	***	0.0002
Normoxia:8C+GCN5KD vs. sIR:CTL	-9.063	-14.19 to -3.937	Yes	***	0.0003
Normoxia:8C+GCN5KD vs. sIR:8c	-0.2392	-5.365 to 4.887	No	ns	>0.9999
Normoxia:8C+GCN5KD vs. sIR:GCN5	-13.98	-19.10 to -8.851	Yes	****	<0.0001
Normoxia:8C+GCN5KD vs. sIR:8C+GCN5KD	-9.52	-14.65 to -4.394	Yes	***	0.0002
sIR:CTL vs. sIR:8c	8.824	3.698 to 13.95	Yes	***	0.0004
sIR:CTL vs. sIR:GCN5	-4.915	-10.04 to 0.2115	No	ns	0.0652
sIR:CTL vs. sIR:8C+GCN5KD	-0.4574	-5.583 to 4.669	No	ns	>0.9999
sIR:8c vs. sIR:GCN5	-13.74	-18.86 to -8.612	Yes	****	<0.0001
sIR:8c vs. sIR:8C+GCN5KD	-9.281	-14.41 to -4.155	Yes	***	0.0002
sIR:GCN5 vs. sIR:8C+GCN5KD	4.457	-0.6688 to 9.583	No	ns	0.1136
Figure 6D
	CTL			CTL+8C			GCN5			GCN5+8C
Normoxia	1.08933	0.890845	1.01982	1.01805	1.05398	1.12761	1.07697	1.00996	0.925915	1.08708	1.08094	1.16127
sI/R	2.40954	2.30592	2.45362	1.63941	1.569	1.7436	2.50903	2.59521	2.32061	2.49594	2.35175	2.25838
Tukey's multiple comparisons test	Mean Diff.	95.00% CI of diff.	Significant?	Summary	Adjusted P Value
Normoxia:CTL vs. Normoxia:CTL+8C	-0.06654	-0.3281 to 0.1950	No	ns	0.9838
Normoxia:CTL vs. Normoxia:GCN5	-0.004281	-0.2659 to 0.2573	No	ns	>0.9999
Normoxia:CTL vs. Normoxia:GCN5+8C	-0.1098	-0.3713 to 0.1518	No	ns	0.8202
Normoxia:CTL vs. sI/R:CTL	-1.39	-1.651 to -1.128	Yes	****	<0.0001
Normoxia:CTL vs. sI/R:CTL+8C	-0.6507	-0.9123 to -0.3891	Yes	****	<0.0001
Normoxia:CTL vs. sI/R:GCN5	-1.475	-1.737 to -1.213	Yes	****	<0.0001
Normoxia:CTL vs. sI/R:GCN5+8C	-1.369	-1.630 to -1.107	Yes	****	<0.0001
Normoxia:CTL+8C vs. Normoxia:GCN5	0.06226	-0.1993 to 0.3238	No	ns	0.9889
Normoxia:CTL+8C vs. Normoxia:GCN5+8C	-0.04322	-0.3048 to 0.2184	No	ns	0.9988
Normoxia:CTL+8C vs. sI/R:CTL	-1.323	-1.585 to -1.062	Yes	****	<0.0001
Normoxia:CTL+8C vs. sI/R:CTL+8C	-0.5841	-0.8457 to -0.3225	Yes	****	<0.0001
Normoxia:CTL+8C vs. sI/R:GCN5	-1.408	-1.670 to -1.147	Yes	****	<0.0001
Normoxia:CTL+8C vs. sI/R:GCN5+8C	-1.302	-1.564 to -1.041	Yes	****	<0.0001
Normoxia:GCN5 vs. Normoxia:GCN5+8C	-0.1055	-0.3671 to 0.1561	No	ns	0.8464
Normoxia:GCN5 vs. sI/R:CTL	-1.385	-1.647 to -1.124	Yes	****	<0.0001
Normoxia:GCN5 vs. sI/R:CTL+8C	-0.6464	-0.9080 to -0.3848	Yes	****	<0.0001
Normoxia:GCN5 vs. sI/R:GCN5	-1.471	-1.732 to -1.209	Yes	****	<0.0001
Normoxia:GCN5 vs. sI/R:GCN5+8C	-1.364	-1.626 to -1.103	Yes	****	<0.0001
Normoxia:GCN5+8C vs. sI/R:CTL	-1.28	-1.542 to -1.018	Yes	****	<0.0001
Normoxia:GCN5+8C vs. sI/R:CTL+8C	-0.5409	-0.8025 to -0.2793	Yes	****	<0.0001
Normoxia:GCN5+8C vs. sI/R:GCN5	-1.365	-1.627 to -1.104	Yes	****	<0.0001
Normoxia:GCN5+8C vs. sI/R:GCN5+8C	-1.259	-1.521 to -0.9973	Yes	****	<0.0001
sI/R:CTL vs. sI/R:CTL+8C	0.739	0.4774 to 1.001	Yes	****	<0.0001
sI/R:CTL vs. sI/R:GCN5	-0.08526	-0.3468 to 0.1763	No	ns	0.9407
sI/R:CTL vs. sI/R:GCN5+8C	0.021	-0.2406 to 0.2826	No	ns	>0.9999
sI/R:CTL+8C vs. sI/R:GCN5	-0.8243	-1.086 to -0.5627	Yes	****	<0.0001
sI/R:CTL+8C vs. sI/R:GCN5+8C	-0.718	-0.9796 to -0.4564	Yes	****	<0.0001
sI/R:GCN5 vs. sI/R:GCN5+8C	0.1063	-0.1553 to 0.3678	No	ns	0.8418
Figure 6E
HO1	CTL			CTL+8C			Kat2a KD			Kat2a KD + 8C
Normoxia	0.952789	1.03363	1.01541	1.21761	1.25	1.34641	1.31455	1.44367	1.32111	1.19373	1.38345	1.36441
sI/R	2.6358	2.61279	2.55176	3.78593	4.08188	4.74719	2.09077	1.82242	1.65882	2.01312	1.77197	2.07556
NQO1	CTL			CTL+8C			Kat2a KD			Kat2a KD + 8C
Normoxia	0.926635	1.03381	1.04388	1.48101	1.75546	1.53977	1.77161	1.58975	1.63926	2.52737	2.26793	2.33857
sI/R	1.84338	1.49031	1.66634	3.18127	2.95448	3.45364	2.06647	1.71859	1.66628	2.30808	2.24205	2.77376
Kat2a	CTL			CTL+8C			Kat2a KD			Kat2a KD + 8C
Normoxia	0.978637	1.01975	1.00204	1.1688	1.22	1.20694	0.164922	0.242448	0.190975	0.209721	0.257505	0.23
sI/R	1.23991	1.2131	1.23851	1.55645	1.57632	1.35001	0.21	0.184892	0.241065	0.185	0.2016	0.219774
HO1
Tukey's multiple comparisons test	Mean Diff.	95.00% CI of diff.	Significant?	Summary	Adjusted P Value
Normoxia:CTL vs. Normoxia:CTL+8C	-0.2707	-0.8535 to 0.3120	No	ns	0.7395
Normoxia:CTL vs. Normoxia:MCAD KD	-0.3592	-0.9419 to 0.2236	No	ns	0.4355
Normoxia:CTL vs. Normoxia:MCAD KD +8C	-0.3133	-0.8960 to 0.2695	No	ns	0.5925
Normoxia:CTL vs. sI/R:CTL	-1.6	-2.182 to -1.017	Yes	****	<0.0001
Normoxia:CTL vs. sI/R:CTL+8C	-3.204	-3.787 to -2.622	Yes	****	<0.0001
Normoxia:CTL vs. sI/R:MCAD KD	-0.8567	-1.440 to -0.2740	Yes	**	0.0022
Normoxia:CTL vs. sI/R:MCAD KD +8C	-0.9529	-1.536 to -0.3702	Yes	***	0.0007
Normoxia:CTL+8C vs. Normoxia:MCAD KD	-0.08844	-0.6712 to 0.4943	No	ns	0.9993
Normoxia:CTL+8C vs. Normoxia:MCAD KD +8C	-0.04252	-0.6253 to 0.5403	No	ns	>0.9999
Normoxia:CTL+8C vs. sI/R:CTL	-1.329	-1.912 to -0.7460	Yes	****	<0.0001
Normoxia:CTL+8C vs. sI/R:CTL+8C	-2.934	-3.516 to -2.351	Yes	****	<0.0001
Normoxia:CTL+8C vs. sI/R:MCAD KD	-0.586	-1.169 to -0.003220	Yes	*	0.0482
Normoxia:CTL+8C vs. sI/R:MCAD KD +8C	-0.6822	-1.265 to -0.09943	Yes	*	0.0161
Normoxia:MCAD KD vs. Normoxia:MCAD KD +8C	0.04591	-0.5369 to 0.6287	No	ns	>0.9999
Normoxia:MCAD KD vs. sI/R:CTL	-1.24	-1.823 to -0.6576	Yes	****	<0.0001
Normoxia:MCAD KD vs. sI/R:CTL+8C	-2.845	-3.428 to -2.262	Yes	****	<0.0001
Normoxia:MCAD KD vs. sI/R:MCAD KD	-0.4976	-1.080 to 0.08522	No	ns	0.1249
Normoxia:MCAD KD vs. sI/R:MCAD KD +8C	-0.5938	-1.177 to -0.01100	Yes	*	0.0442
Normoxia:MCAD KD +8C vs. sI/R:CTL	-1.286	-1.869 to -0.7035	Yes	****	<0.0001
Normoxia:MCAD KD +8C vs. sI/R:CTL+8C	-2.891	-3.474 to -2.308	Yes	****	<0.0001
Normoxia:MCAD KD +8C vs. sI/R:MCAD KD	-0.5435	-1.126 to 0.03930	No	ns	0.077
Normoxia:MCAD KD +8C vs. sI/R:MCAD KD +8C	-0.6397	-1.222 to -0.05691	Yes	*	0.0263
sI/R:CTL vs. sI/R:CTL+8C	-1.605	-2.188 to -1.022	Yes	****	<0.0001
sI/R:CTL vs. sI/R:MCAD KD	0.7428	0.1600 to 1.326	Yes	**	0.008
sI/R:CTL vs. sI/R:MCAD KD +8C	0.6466	0.06379 to 1.229	Yes	*	0.0243
sI/R:CTL+8C vs. sI/R:MCAD KD	2.348	1.765 to 2.930	Yes	****	<0.0001
sI/R:CTL+8C vs. sI/R:MCAD KD +8C	2.251	1.669 to 2.834	Yes	****	<0.0001
sI/R:MCAD KD vs. sI/R:MCAD KD +8C	-0.09621	-0.6790 to 0.4866	No	ns	0.9988
NQO1
Tukey's multiple comparisons test	Mean Diff.	95.00% CI of diff.	Significant?	Summary	Adjusted P Value
Normoxia:CTL vs. Normoxia:CTL+8C	-0.5906	-1.117 to -0.06475	Yes	*	0.0222
Normoxia:CTL vs. Normoxia:MCAD KD	-0.6654	-1.191 to -0.1395	Yes	**	0.0085
Normoxia:CTL vs. Normoxia:MCAD KD +8C	-1.377	-1.902 to -0.8506	Yes	****	<0.0001
Normoxia:CTL vs. sI/R:CTL	-0.6652	-1.191 to -0.1393	Yes	**	0.0085
Normoxia:CTL vs. sI/R:CTL+8C	-2.195	-2.721 to -1.669	Yes	****	<0.0001
Normoxia:CTL vs. sI/R:MCAD KD	-0.8157	-1.342 to -0.2898	Yes	**	0.0013
Normoxia:CTL vs. sI/R:MCAD KD +8C	-1.44	-1.966 to -0.9140	Yes	****	<0.0001
Normoxia:CTL+8C vs. Normoxia:MCAD KD	-0.07479	-0.6007 to 0.4511	No	ns	0.9995
Normoxia:CTL+8C vs. Normoxia:MCAD KD +8C	-0.7859	-1.312 to -0.2600	Yes	**	0.0018
Normoxia:CTL+8C vs. sI/R:CTL	-0.0746	-0.6005 to 0.4513	No	ns	0.9995
Normoxia:CTL+8C vs. sI/R:CTL+8C	-1.604	-2.130 to -1.078	Yes	****	<0.0001
Normoxia:CTL+8C vs. sI/R:MCAD KD	-0.225	-0.7509 to 0.3009	No	ns	0.8062
Normoxia:CTL+8C vs. sI/R:MCAD KD +8C	-0.8492	-1.375 to -0.3233	Yes	***	0.0008
Normoxia:MCAD KD vs. Normoxia:MCAD KD +8C	-0.7111	-1.237 to -0.1852	Yes	**	0.0047
Normoxia:MCAD KD vs. sI/R:CTL	0.000196	-0.5257 to 0.5261	No	ns	>0.9999
Normoxia:MCAD KD vs. sI/R:CTL+8C	-1.53	-2.055 to -1.004	Yes	****	<0.0001
Normoxia:MCAD KD vs. sI/R:MCAD KD	-0.1502	-0.6761 to 0.3757	No	ns	0.9696
Normoxia:MCAD KD vs. sI/R:MCAD KD +8C	-0.7744	-1.300 to -0.2485	Yes	**	0.0021
Normoxia:MCAD KD +8C vs. sI/R:CTL	0.7113	0.1854 to 1.237	Yes	**	0.0047
Normoxia:MCAD KD +8C vs. sI/R:CTL+8C	-0.8185	-1.344 to -0.2926	Yes	**	0.0012
Normoxia:MCAD KD +8C vs. sI/R:MCAD KD	0.5608	0.03495 to 1.087	Yes	*	0.0324
Normoxia:MCAD KD +8C vs. sI/R:MCAD KD +8C	-0.06334	-0.5892 to 0.4625	No	ns	0.9998
sI/R:CTL vs. sI/R:CTL+8C	-1.53	-2.056 to -1.004	Yes	****	<0.0001
sI/R:CTL vs. sI/R:MCAD KD	-0.1504	-0.6763 to 0.3755	No	ns	0.9694
sI/R:CTL vs. sI/R:MCAD KD +8C	-0.7746	-1.301 to -0.2487	Yes	**	0.0021
sI/R:CTL+8C vs. sI/R:MCAD KD	1.379	0.8535 to 1.905	Yes	****	<0.0001
sI/R:CTL+8C vs. sI/R:MCAD KD +8C	0.7552	0.2293 to 1.281	Yes	**	0.0027
sI/R:MCAD KD vs. sI/R:MCAD KD +8C	-0.6242	-1.150 to -0.09830	Yes	*	0.0145
KAT2a
Tukey's multiple comparisons test	Mean Diff.	95.00% CI of diff.	Significant?	Summary	Adjusted P Value
Normoxia:CTL vs. Normoxia:CTL+8C	-0.1984	-0.3408 to -0.05607	Yes	**	0.0036
Normoxia:CTL vs. Normoxia:MCAD KD	0.8007	0.6583 to 0.9431	Yes	****	<0.0001
Normoxia:CTL vs. Normoxia:MCAD KD +8C	0.7677	0.6254 to 0.9101	Yes	****	<0.0001
Normoxia:CTL vs. sI/R:CTL	-0.2304	-0.3727 to -0.08800	Yes	***	0.0008
Normoxia:CTL vs. sI/R:CTL+8C	-0.4941	-0.6365 to -0.3518	Yes	****	<0.0001
Normoxia:CTL vs. sI/R:MCAD KD	0.7882	0.6458 to 0.9305	Yes	****	<0.0001
Normoxia:CTL vs. sI/R:MCAD KD +8C	0.798	0.6557 to 0.9404	Yes	****	<0.0001
Normoxia:CTL+8C vs. Normoxia:MCAD KD	0.9991	0.8568 to 1.141	Yes	****	<0.0001
Normoxia:CTL+8C vs. Normoxia:MCAD KD +8C	0.9662	0.8238 to 1.109	Yes	****	<0.0001
Normoxia:CTL+8C vs. sI/R:CTL	-0.03193	-0.1743 to 0.1104	No	ns	0.9921
Normoxia:CTL+8C vs. sI/R:CTL+8C	-0.2957	-0.4380 to -0.1533	Yes	****	<0.0001
Normoxia:CTL+8C vs. sI/R:MCAD KD	0.9866	0.8442 to 1.129	Yes	****	<0.0001
Normoxia:CTL+8C vs. sI/R:MCAD KD +8C	0.9965	0.8541 to 1.139	Yes	****	<0.0001
Normoxia:MCAD KD vs. Normoxia:MCAD KD +8C	-0.03296	-0.1753 to 0.1094	No	ns	0.9905
Normoxia:MCAD KD vs. sI/R:CTL	-1.031	-1.173 to -0.8887	Yes	****	<0.0001
Normoxia:MCAD KD vs. sI/R:CTL+8C	-1.295	-1.437 to -1.152	Yes	****	<0.0001
Normoxia:MCAD KD vs. sI/R:MCAD KD	-0.01254	-0.1549 to 0.1298	No	ns	>0.9999
Normoxia:MCAD KD vs. sI/R:MCAD KD +8C	-0.002677	-0.1450 to 0.1397	No	ns	>0.9999
Normoxia:MCAD KD +8C vs. sI/R:CTL	-0.9981	-1.140 to -0.8557	Yes	****	<0.0001
Normoxia:MCAD KD +8C vs. sI/R:CTL+8C	-1.262	-1.404 to -1.119	Yes	****	<0.0001
Normoxia:MCAD KD +8C vs. sI/R:MCAD KD	0.02042	-0.1219 to 0.1628	No	ns	0.9995
Normoxia:MCAD KD +8C vs. sI/R:MCAD KD +8C	0.03028	-0.1121 to 0.1726	No	ns	0.9943
sI/R:CTL vs. sI/R:CTL+8C	-0.2638	-0.4061 to -0.1214	Yes	***	0.0002
sI/R:CTL vs. sI/R:MCAD KD	1.019	0.8762 to 1.161	Yes	****	<0.0001
sI/R:CTL vs. sI/R:MCAD KD +8C	1.028	0.8860 to 1.171	Yes	****	<0.0001
sI/R:CTL+8C vs. sI/R:MCAD KD	1.282	1.140 to 1.425	Yes	****	<0.0001
sI/R:CTL+8C vs. sI/R:MCAD KD +8C	1.292	1.150 to 1.435	Yes	****	<0.0001
sI/R:MCAD KD vs. sI/R:MCAD KD +8C	0.009861	-0.1325 to 0.1522	No	ns	>0.9999
Figure 6F
HO1	CTL			CTL+8C			MCAD KD			MCAD KD +8C
Normoxia	1	1	1	1.86184	1.72318	1.77231	0.553473	0.773537	0.645275	0.91331	0.872466	0.97065
sI/R	2.11109	1.64801	1.78896	2.26832	3.06046	2.46975	0.799673	0.963938	0.852524	0.801907	0.906052	0.882112
NQO1	CTL			CTL+8C			MCAD KD			MCAD KD +8C
Normoxia	1	1	1	1.28923	1.50491	1.35285	1.13507	0.609126	0.754392	1.20176	0.96339	1.02129
sI/R	1.18915	1.48932	1.32536	1.4299	2.28986	2.06814	0.802627	1.11428	0.918284	0.786442	0.914203	0.827568
HO1
Tukey's multiple comparisons test	Mean Diff.	95.00% CI of diff.	Significant?	Summary	Adjusted P Value
Normoxia:CTL vs. Normoxia:CTL+8C	-0.7858	-1.291 to -0.2806	Yes	**	0.0012
Normoxia:CTL vs. Normoxia:MCAD KD	0.3426	-0.1626 to 0.8477	No	ns	0.3275
Normoxia:CTL vs. Normoxia:MCAD KD +8C	0.08119	-0.4239 to 0.5863	No	ns	0.999
Normoxia:CTL vs. sI/R:CTL	-0.8494	-1.354 to -0.3442	Yes	***	0.0005
Normoxia:CTL vs. sI/R:CTL+8C	-1.6	-2.105 to -1.094	Yes	****	<0.0001
Normoxia:CTL vs. sI/R:MCAD KD	0.128	-0.3772 to 0.6331	No	ns	0.9842
Normoxia:CTL vs. sI/R:MCAD KD +8C	0.1366	-0.3685 to 0.6418	No	ns	0.9773
Normoxia:CTL+8C vs. Normoxia:MCAD KD	1.128	0.6232 to 1.633	Yes	****	<0.0001
Normoxia:CTL+8C vs. Normoxia:MCAD KD +8C	0.867	0.3618 to 1.372	Yes	***	0.0004
Normoxia:CTL+8C vs. sI/R:CTL	-0.06358	-0.5687 to 0.4416	No	ns	0.9998
Normoxia:CTL+8C vs. sI/R:CTL+8C	-0.8137	-1.319 to -0.3086	Yes	***	0.0008
Normoxia:CTL+8C vs. sI/R:MCAD KD	0.9137	0.4086 to 1.419	Yes	***	0.0002
Normoxia:CTL+8C vs. sI/R:MCAD KD +8C	0.9224	0.4173 to 1.428	Yes	***	0.0002
Normoxia:MCAD KD vs. Normoxia:MCAD KD +8C	-0.2614	-0.7665 to 0.2437	No	ns	0.6338
Normoxia:MCAD KD vs. sI/R:CTL	-1.192	-1.697 to -0.6868	Yes	****	<0.0001
Normoxia:MCAD KD vs. sI/R:CTL+8C	-1.942	-2.447 to -1.437	Yes	****	<0.0001
Normoxia:MCAD KD vs. sI/R:MCAD KD	-0.2146	-0.7197 to 0.2905	No	ns	0.8114
Normoxia:MCAD KD vs. sI/R:MCAD KD +8C	-0.2059	-0.7111 to 0.2992	No	ns	0.8395
Normoxia:MCAD KD +8C vs. sI/R:CTL	-0.9305	-1.436 to -0.4254	Yes	***	0.0002
Normoxia:MCAD KD +8C vs. sI/R:CTL+8C	-1.681	-2.186 to -1.176	Yes	****	<0.0001
Normoxia:MCAD KD +8C vs. sI/R:MCAD KD	0.04676	-0.4584 to 0.5519	No	ns	>0.9999
Normoxia:MCAD KD +8C vs. sI/R:MCAD KD +8C	0.05545	-0.4497 to 0.5606	No	ns	>0.9999
sI/R:CTL vs. sI/R:CTL+8C	-0.7502	-1.255 to -0.2450	Yes	**	0.0019
sI/R:CTL vs. sI/R:MCAD KD	0.9773	0.4722 to 1.482	Yes	***	0.0001
sI/R:CTL vs. sI/R:MCAD KD +8C	0.986	0.4809 to 1.491	Yes	****	<0.0001
sI/R:CTL+8C vs. sI/R:MCAD KD	1.727	1.222 to 2.233	Yes	****	<0.0001
sI/R:CTL+8C vs. sI/R:MCAD KD +8C	1.736	1.231 to 2.241	Yes	****	<0.0001
sI/R:MCAD KD vs. sI/R:MCAD KD +8C	0.008688	-0.4964 to 0.5138	No	ns	>0.9999
NQO1
Tukey's multiple comparisons test	Mean Diff.	95.00% CI of diff.	Significant?	Summary	Adjusted P Value
Normoxia:CTL vs. Normoxia:CTL+8C	-0.3823	-0.9757 to 0.2111	No	ns	0.3845
Normoxia:CTL vs. Normoxia:MCAD KD	0.1671	-0.4263 to 0.7605	No	ns	0.9718
Normoxia:CTL vs. Normoxia:MCAD KD +8C	-0.06215	-0.6555 to 0.5312	No	ns	>0.9999
Normoxia:CTL vs. sI/R:CTL	-0.3346	-0.9280 to 0.2588	No	ns	0.5385
Normoxia:CTL vs. sI/R:CTL+8C	-0.9293	-1.523 to -0.3359	Yes	**	0.0011
Normoxia:CTL vs. sI/R:MCAD KD	0.05493	-0.5385 to 0.6483	No	ns	>0.9999
Normoxia:CTL vs. sI/R:MCAD KD +8C	0.1573	-0.4361 to 0.7507	No	ns	0.9797
Normoxia:CTL+8C vs. Normoxia:MCAD KD	0.5495	-0.04393 to 1.143	No	ns	0.0802
Normoxia:CTL+8C vs. Normoxia:MCAD KD +8C	0.3202	-0.2732 to 0.9136	No	ns	0.5883
Normoxia:CTL+8C vs. sI/R:CTL	0.04772	-0.5457 to 0.6411	No	ns	>0.9999
Normoxia:CTL+8C vs. sI/R:CTL+8C	-0.547	-1.140 to 0.04642	No	ns	0.0823
Normoxia:CTL+8C vs. sI/R:MCAD KD	0.4373	-0.1561 to 1.031	No	ns	0.2427
Normoxia:CTL+8C vs. sI/R:MCAD KD +8C	0.5396	-0.05380 to 1.133	No	ns	0.089
Normoxia:MCAD KD vs. Normoxia:MCAD KD +8C	-0.2293	-0.8227 to 0.3641	No	ns	0.8713
Normoxia:MCAD KD vs. sI/R:CTL	-0.5017	-1.095 to 0.09164	No	ns	0.1312
Normoxia:MCAD KD vs. sI/R:CTL+8C	-1.096	-1.690 to -0.5030	Yes	***	0.0002
Normoxia:MCAD KD vs. sI/R:MCAD KD	-0.1122	-0.7056 to 0.4812	No	ns	0.9972
Normoxia:MCAD KD vs. sI/R:MCAD KD +8C	-0.009874	-0.6033 to 0.5835	No	ns	>0.9999
Normoxia:MCAD KD +8C vs. sI/R:CTL	-0.2725	-0.8659 to 0.3209	No	ns	0.7498
Normoxia:MCAD KD +8C vs. sI/R:CTL+8C	-0.8672	-1.461 to -0.2738	Yes	**	0.0023
Normoxia:MCAD KD +8C vs. sI/R:MCAD KD	0.1171	-0.4763 to 0.7105	No	ns	0.9964
Normoxia:MCAD KD +8C vs. sI/R:MCAD KD +8C	0.2194	-0.3740 to 0.8128	No	ns	0.8935
sI/R:CTL vs. sI/R:CTL+8C	-0.5947	-1.188 to -0.001297	Yes	*	0.0493
sI/R:CTL vs. sI/R:MCAD KD	0.3895	-0.2038 to 0.9829	No	ns	0.3634
sI/R:CTL vs. sI/R:MCAD KD +8C	0.4919	-0.1015 to 1.085	No	ns	0.1448
sI/R:CTL+8C vs. sI/R:MCAD KD	0.9842	0.3908 to 1.578	Yes	***	0.0006
sI/R:CTL+8C vs. sI/R:MCAD KD +8C	1.087	0.4932 to 1.680	Yes	***	0.0002
sI/R:MCAD KD vs. sI/R:MCAD KD +8C	0.1023	-0.4911 to 0.6957	No	ns	0.9984
