# Supplementary material for: Acetyl-CoA production by specific metabolites promotes cardiac repair after myocardial infarction via histone acetylation
Source: eLife. 2021 Dec 23;10:e60311. doi: 10.7554/eLife.60311 (PMC8763402; doi:10.7554/eLife.60311)
Supplement: Supplementary file 1. [file elife-60311-supp1.xlsx]

## Sheet: DEGs
	baseMean	log2FoldChange	lfcSE	stat	pvalue	padj
	758.996	0.169241	0.11405	1.48392	0.13783	0.248915
1700066B19Rik	6.51666	-0.480445	0.659787	-0.728182	0.466502	0.610855
1700092M07Rik	1.4529	-0.648643	1.78185	-0.364028	0.715837	NA
A2m	29.6547	-0.299394	0.382579	-0.782568	0.433881	0.581114
A3galt2	808.126	-0.510333	0.2317	-2.20256	0.0276255	0.072082
A4galt	42.5462	0.0179	0.513257	0.0348753	0.972179	0.983939
Aaas	364.573	-0.506415	0.219037	-2.312	0.0207775	0.0576178
AABR07000147.1	25.353	-0.73018	0.452231	-1.61462	0.106394	0.204738
AABR07000156.1	10.7525	-0.241767	0.636439	-0.379874	0.704039	0.805278
AABR07000159.2	1.57409	-1.05062	1.8241	-0.575965	0.564639	NA
AABR07000248.1	75.1292	-0.272298	0.304369	-0.894629	0.370985	0.519538
AABR07000261.1	5.49513	1.16789	0.851937	1.37086	0.170418	0.291208
AABR07000398.1	28728	-0.0413431	0.781426	-0.0529072	0.957806	0.976028
AABR07000534.1	35.2789	-0.261204	0.430733	-0.606416	0.544238	0.679237
AABR07000595.1	2.34659	0.466642	1.55032	0.300997	0.763417	NA
AABR07000629.3	18.861	1.3222	2.11219	0.625984	0.531326	0.668223
AABR07000658.2	321.374	-1.60185	0.337304	-4.74898	2.04e-06	3.22e-05
AABR07000733.1	1.10843	0.738445	2.08123	0.354812	0.72273	NA
AABR07000740.1	2.47752	-1.40689	1.51923	-0.926057	0.354416	NA
AABR07000765.3	4.40602	-1.06257	0.958006	-1.10914	0.267368	NA
AABR07000902.1	10.1082	-1.63717	0.760004	-2.15416	0.0312274	0.079156
AABR07001037.1	301.274	0.593278	0.220125	2.69518	0.00703497	0.0243221
AABR07001048.1	104.749	0.020301	0.204289	0.0993737	0.920842	0.953224
AABR07001099.2	182.864	0.326681	0.222457	1.46852	0.141964	0.254645
AABR07001100.1	2.64236	-1.27524	1.31917	-0.9667	0.333694	NA
AABR07001435.1	125.155	-0.332243	0.179531	-1.85062	0.0642244	0.138782
AABR07001512.1	59.2831	-0.28814	0.717053	-0.401839	0.687803	0.792831
AABR07001519.1	22.2552	1.83581	0.525255	3.49508	0.000473919	0.002815
AABR07001807.1	36.0588	0.388493	0.67025	0.579624	0.562168	0.694265
AABR07001896.1	58.5127	0.0285783	0.224759	0.127151	0.898821	0.939693
AABR07001902.1	1.86181	-0.213389	1.36352	-0.156498	0.87564	NA
AABR07001905.1	1.0545	0.0818313	2.19888	0.037215	0.970314	NA
AABR07001905.2	131.946	0.479729	0.207844	2.30812	0.0209926	0.0581076
AABR07001910.1	84.0175	0.308588	0.248535	1.24163	0.214374	0.347289
AABR07001923.1	80.0879	0.263401	0.300477	0.876611	0.380698	0.52936
AABR07001926.3	52.4203	0.35786	0.297849	1.20148	0.229565	0.365972
AABR07002065.1	14.7283	0.590877	0.538502	1.09726	0.272528	0.414585
AABR07002065.2	56.2541	-0.0169836	0.266664	-0.0636892	0.949218	0.970295
AABR07002068.1	92.6686	0.0267451	0.226297	0.118186	0.905921	0.943908
AABR07002093.1	4.02203	0.143772	0.95777	0.150111	0.880677	NA
AABR07002247.1	15.1186	0.213567	0.534835	0.399315	0.689661	0.794186
AABR07002353.2	1.7636	0.57665	1.4435	0.399481	0.689539	NA
AABR07002564.1	3.66558	-0.587681	1.08314	-0.54257	0.587426	NA
AABR07002677.1	122.983	-2.78248	2.11269	-1.31703	0.187828	0.313435
AABR07002683.1	563.112	0.363985	0.223517	1.62844	0.103431	0.200489
AABR07002768.1	545.691	-0.517772	0.202774	-2.55344	0.0106664	0.0340409
AABR07002774.1	69.6135	-0.369159	0.262951	-1.40391	0.160347	0.279005
AABR07002774.2	96.3902	0.145766	0.30121	0.483936	0.628432	0.748145
AABR07002774.4	13.2399	-0.442809	0.516846	-0.856752	0.391582	0.539282
AABR07002784.1	35.802	-0.701481	0.350767	-1.99985	0.045517	0.106167
AABR07002848.1	37.7715	0.168603	0.273612	0.616211	0.537756	0.674203
AABR07002868.1	16.1199	0.176463	0.537813	0.328112	0.742827	0.833054
AABR07002870.1	24.2512	0.268584	0.425809	0.630761	0.528196	0.666038
AABR07002870.2	0.864261	-0.742048	3.87191	-0.191649	0.848017	NA
AABR07002885.1	19.0951	-0.65596	0.558349	-1.17482	0.240067	0.37822
AABR07002893.1	3.88774	-1.85846	1.24059	-1.49805	0.13412	NA
AABR07002896.1	24.2512	0.268584	0.425809	0.630761	0.528196	0.666038
AABR07002945.1	172.091	-0.684593	0.20697	-3.30769	0.000940673	0.00485607
AABR07002945.2	2.65392	-5.21167	1.82553	-2.85489	0.00430517	NA
AABR07002966.1	5.9928	-0.995695	1.41072	-0.705805	0.480309	0.623426
AABR07002997.1	4.83621	-0.456719	0.798675	-0.571846	0.567426	0.69836
AABR07002997.2	3.90723	1.80132	1.25344	1.4371	0.150689	NA
AABR07003049.1	3.40669	4.34284	2.17764	1.99428	0.046121	NA
AABR07003056.1	25.2887	1.43843	0.930354	1.54611	0.122078	0.227057
AABR07003173.1	8.10684	-0.412998	0.660926	-0.624878	0.532051	0.668828
AABR07003176.1	151.08	0.253559	0.277888	0.912449	0.361532	0.50975
AABR07003187.1	8.38058	1.9386	0.936278	2.07054	0.0384019	0.0931226
AABR07003235.1	91.3828	0.279337	0.295514	0.94526	0.344526	0.492267
AABR07003250.1	4.35429	2.26887	1.30178	1.74289	0.081352	NA
AABR07003273.1	1.19171	-0.386894	1.93014	-0.200449	0.84113	NA
AABR07003650.1	35.4106	0.983031	1.78792	0.549817	0.582445	0.710878
AABR07003933.1	3.97017	0.643498	0.947634	0.679057	0.497102	NA
AABR07003944.1	35.4106	0.983031	1.78792	0.549817	0.582445	0.710878
AABR07004232.1	120.566	-0.20974	0.240789	-0.87105	0.383727	0.532274
AABR07004269.3	121.02	-0.967071	0.323785	-2.98677	0.00281944	0.0116487
AABR07004269.6	13.3732	0.674291	0.541864	1.24439	0.213355	0.34627
AABR07004276.1	2.53089	-0.0687952	0.957718	-0.0718325	0.942735	NA
AABR07004397.1	3.03446	0.8531	1.18914	0.717411	0.47312	NA
AABR07004746.1	0.89458	-1.46957	3.01882	-0.486803	0.626398	NA
AABR07004799.1	4.04561	0.780161	2.48959	0.313369	0.754	NA
AABR07004812.1	15.7616	0.529565	0.459543	1.15237	0.249167	0.388247
AABR07004812.2	15.0292	0.450893	0.477804	0.943677	0.345335	0.493114
AABR07004876.1	4.80355	-1.05784	0.845801	-1.25069	0.211046	0.343297
AABR07004894.1	3.40082	-0.417737	1.9385	-0.215495	0.829382	NA
AABR07004912.2	6.5617	-0.182807	0.810667	-0.225502	0.821589	0.888467
AABR07004992.1	48.7492	0.886577	0.300217	2.95312	0.00314582	0.0127735
AABR07005027.1	3.54239	-1.48486	1.07288	-1.384	0.166357	NA
AABR07005031.1	77.9103	-1.21187	0.259397	-4.67187	2.98e-06	4.42e-05
AABR07005506.1	1.4333	-0.690742	1.42564	-0.484512	0.628023	NA
AABR07005563.1	4.31682	0.556599	1.11848	0.49764	0.618738	NA
AABR07005572.2	1.97129	0.373309	1.41782	0.263297	0.792322	NA
AABR07005581.1	69.3816	-0.0640079	0.467383	-0.13695	0.891071	0.935245
AABR07005588.1	724.978	-0.366404	0.0986542	-3.71403	0.000203988	0.00143052
AABR07005618.1	48.1831	0.45409	0.354463	1.28106	0.200171	0.329547
AABR07005633.1	4.41516	-0.0115227	0.937264	-0.012294	0.990191	NA
AABR07005667.1	1.48158	0.324065	1.51425	0.21401	0.830539	NA
AABR07005775.1	2.43123	2.20696	1.22247	1.80533	0.0710225	NA
AABR07005779.1	307.762	0.142967	0.131822	1.08454	0.278126	0.420909
AABR07005821.1	130.848	0.640631	0.163212	3.92515	8.67e-05	0.000710389
AABR07005838.1	14.4034	2.47899	1.22194	2.02872	0.0424864	0.100698
AABR07005844.1	67.826	0.991616	0.311077	3.18769	0.00143417	0.00680721
AABR07006025.1	775.939	0.0553616	0.246252	0.224817	0.822122	0.888852
AABR07006025.2	1.77556	0.671116	1.67713	0.400157	0.689041	NA
AABR07006030.1	3.72866	-0.193029	0.916685	-0.210573	0.83322	NA
AABR07006033.1	5.91973	-0.0415054	0.908241	-0.0456986	0.96355	0.979503
AABR07006076.1	2.57885	-1.44018	2.43769	-0.590794	0.554658	NA
AABR07006142.1	11.805	-0.888224	0.663207	-1.33929	0.180478	0.304458
AABR07006160.1	113.442	0.105679	0.322432	0.327755	0.743097	0.833139
AABR07006258.1	6.60252	0.171554	1.41966	0.120842	0.903816	0.942553
AABR07006269.1	76.6007	-0.00563304	0.358284	-0.0157223	0.987456	0.992699
AABR07006275.1	11.3867	0.146237	0.609065	0.2401	0.810252	0.880542
AABR07006278.1	82.7644	1.41377	0.268818	5.2592	1.45e-07	3.45e-06
AABR07006310.1	768.992	0.115149	0.436372	0.263878	0.791874	0.867135
AABR07006333.1	7.16335	0.293963	0.893352	0.329056	0.742113	0.832723
AABR07006367.1	2.26679	-1.71944	1.51744	-1.13312	0.257164	NA
AABR07006451.1	3.05316	-0.32195	1.2095	-0.266184	0.790098	NA
AABR07006458.1	120.835	0.667932	0.217127	3.07623	0.00209638	0.00921098
AABR07006502.1	3.87408	1.4605	1.00501	1.45322	0.146162	NA
AABR07006536.1	4.00908	0.967046	0.976076	0.990748	0.321809	NA
AABR07006576.1	3.30612	-1.18299	1.21025	-0.977471	0.328336	NA
AABR07006619.1	1.46701	-0.306869	1.94303	-0.157933	0.874509	NA
AABR07006672.1	59.2605	0.0102156	0.261106	0.0391244	0.968791	0.982411
AABR07006688.2	5.517	-0.976583	0.843071	-1.15836	0.246715	0.385421
AABR07006727.1	7.0894	1.95714	0.833204	2.34894	0.0188271	0.0534254
AABR07006774.1	8.45134	0.786773	0.589111	1.33552	0.181705	0.305741
AABR07006866.1	18.5759	0.265988	0.444724	0.598096	0.549776	0.684275
AABR07007000.1	17.3737	0.477445	0.446907	1.06833	0.285371	0.429121
AABR07007023.1	50.5821	0.0060521	0.386505	0.0156585	0.987507	0.992699
AABR07007032.1	2819.97	1.13461	0.299741	3.78531	0.000153518	0.00113616
AABR07007068.1	160.24	1.20991	0.343103	3.52639	0.000421271	0.00255966
AABR07007121.1	39.1666	-0.0303415	0.442746	-0.0685303	0.945364	0.968182
AABR07007146.1	5.07575	2.09417	0.956727	2.18889	0.0286048	0.0740235
AABR07007544.1	2.88185	-1.38298	1.19316	-1.15909	0.24642	NA
AABR07007642.1	56.9772	0.859884	0.315585	2.72473	0.00643543	0.0227013
AABR07007675.1	2.73534	-5.39461	2.83579	-1.90233	0.0571276	NA
AABR07007730.1	4.34632	0.644282	1.03419	0.622984	0.533295	NA
AABR07007744.1	41.1912	0.0682402	1.95861	0.0348412	0.972206	0.983939
AABR07007839.1	3.36601	1.22371	0.988157	1.23838	0.215576	NA
AABR07007905.1	2.99273	-5.16234	1.58719	-3.25251	0.0011439	NA
AABR07007905.2	629.477	-0.0777753	0.148966	-0.522101	0.6016	0.726275
AABR07007997.1	757.662	-0.0444243	0.174439	-0.25467	0.798978	0.871942
AABR07008016.1	25.7049	-0.295215	0.333574	-0.885008	0.376152	0.525021
AABR07008025.1	1.27209	0.398584	1.6456	0.242211	0.808616	NA
AABR07008097.1	8.22147	0.154797	0.842289	0.183782	0.854185	0.911126
AABR07008293.3	4.01801	-2.21756	1.42819	-1.55271	0.120493	NA
AABR07008293.4	13.1902	0.947789	1.0376	0.913447	0.361007	0.509295
AABR07008300.1	1.95939	-2.5122	1.58273	-1.58726	0.112454	NA
AABR07008350.1	4.78463	-1.61151	1.02563	-1.57124	0.116127	0.21886
AABR07008439.1	8.93613	1.60233	0.64806	2.47251	0.0134168	0.0409169
AABR07008608.1	374.452	-0.111724	0.222137	-0.502949	0.615	0.736859
AABR07008670.1	13.9374	-0.16511	0.546216	-0.30228	0.762439	0.846563
AABR07008681.1	37.6021	-0.674931	0.639192	-1.05591	0.291008	0.435561
AABR07008805.1	2.28567	-2.73067	2.23604	-1.2212	0.222009	NA
AABR07008911.1	2.83504	0.259794	1.23768	0.209904	0.833743	NA
AABR07008940.1	74.2395	-1.05575	0.324193	-3.25654	0.0011278	0.00558537
AABR07009105.1	13.1747	0.489643	0.52512	0.93244	0.351109	0.499294
AABR07009221.1	101.167	1.0037	0.553487	1.8134	0.0697694	0.148725
AABR07009260.1	7.73163	0.419284	0.693865	0.604273	0.545662	0.680613
AABR07009572.1	3.42083	0.0241933	1.19801	0.0201945	0.983888	NA
AABR07009638.1	1.29518	3.21875	1.75604	1.83296	0.0668083	NA
AABR07009715.1	89.947	-0.161989	0.203813	-0.794792	0.426735	0.574136
AABR07009770.1	1.0928	-0.174624	2.02627	-0.08618	0.931323	NA
AABR07009787.1	72.7854	0.374638	0.316181	1.18488	0.236064	0.373571
AABR07009834.1	14.8926	-0.175613	0.492403	-0.356644	0.721358	0.817904
AABR07009931.1	16.3013	-0.0955309	0.529812	-0.180311	0.856909	0.912871
AABR07009978.1	1.5003	2.50968	1.88791	1.32934	0.183736	NA
AABR07010030.2	2469.07	-0.689343	0.148902	-4.6295	3.67e-06	5.18e-05
AABR07010041.1	3.46194	-0.333227	0.880792	-0.378326	0.705188	NA
AABR07010085.1	14.85	2.93147	0.748834	3.91471	9.05e-05	0.000737833
AABR07010085.2	1.44702	1.66032	1.55122	1.07033	0.284472	NA
AABR07010370.1	20.1764	0.653934	1.34023	0.487928	0.625601	0.745833
AABR07010460.1	118.701	-0.446371	0.193733	-2.30406	0.0212193	0.0585566
AABR07010563.1	19.806	0.678668	0.45332	1.49711	0.134366	0.244353
AABR07010609.1	75.8966	-0.233652	0.257871	-0.90608	0.364893	0.513264
AABR07010649.1	790.812	-0.522001	0.106821	-4.88671	1.03e-06	1.82e-05
AABR07010682.1	125.265	0.206823	0.39156	0.528203	0.597358	0.722831
AABR07010705.1	258.176	0.125238	0.200839	0.623573	0.532908	0.669626
AABR07010787.1	1.38648	0.934604	1.67238	0.558847	0.576266	NA
AABR07010878.1	200.593	0.292798	0.333821	0.877112	0.380426	0.529275
AABR07011031.1	13.3977	-0.366004	0.661199	-0.553547	0.579889	0.70882
AABR07011057.1	9.52075	-0.57562	0.544508	-1.05714	0.290448	0.434903
AABR07011057.2	12.0949	-2.19141	1.2793	-1.71297	0.0867183	0.175941
AABR07011672.1	7.28492	0.708148	0.924694	0.765819	0.443784	0.591021
AABR07011700.1	11.5386	-0.789121	1.3595	-0.580448	0.561612	0.694032
AABR07011733.1	64.4373	-0.789905	0.573288	-1.37785	0.16825	0.288633
AABR07011857.1	65.641	1.09796	0.607713	1.80672	0.0708065	0.150384
AABR07011951.1	6123.25	0.166993	0.248125	0.673019	0.500935	0.641729
AABR07011956.1	6.29305	-0.680523	1.16845	-0.582417	0.560286	0.693073
AABR07012039.1	13.9621	-2.05777	0.759607	-2.70899	0.00674894	0.0235869
AABR07012054.1	134.115	0.236574	0.273679	0.864424	0.387355	0.535414
AABR07012129.1	87.0481	-0.0778227	0.203259	-0.382875	0.701813	0.80334
AABR07012583.2	5.66799	1.2851	0.876916	1.46547	0.142792	0.255692
AABR07012775.1	19.9554	-1.31453	0.630064	-2.08634	0.036948	0.0904244
AABR07012777.1	3.90749	-0.0818599	0.929139	-0.088103	0.929795	NA
AABR07012779.1	3.28741	-0.931737	0.957635	-0.972956	0.330575	NA
AABR07012785.1	3.90749	-0.0818599	0.929139	-0.088103	0.929795	NA
AABR07012785.2	5.82666	1.00178	1.04697	0.956834	0.338651	0.486537
AABR07012795.1	15.1899	0.059479	0.53966	0.110216	0.912238	0.948078
AABR07012826.1	2.75085	0.246567	1.09103	0.225994	0.821206	NA
AABR07012856.1	3.92543	1.1485	1.10945	1.03519	0.300578	NA
AABR07013065.1	238.702	-0.206419	0.207683	-0.993914	0.320265	0.467265
AABR07013086.1	1.80298	-0.552914	1.57782	-0.350429	0.726017	NA
AABR07013111.1	1.56025	-1.62531	1.61366	-1.00722	0.313827	NA
AABR07013154.2	59.6194	-1.94738	0.329081	-5.91763	3.27e-09	1.34e-07
AABR07013200.1	6.00736	0.0593034	0.844203	0.0702478	0.943996	0.967569
AABR07013202.1	17.7159	1.22843	0.423107	2.90336	0.00369187	0.0145261
AABR07013255.1	27.024	-0.790655	0.460321	-1.71762	0.0858662	0.174517
AABR07013288.4	9.87311	-0.802004	0.590721	-1.35767	0.174569	0.296677
AABR07013302.1	2.13327	1.0225	1.39039	0.735404	0.462093	NA
AABR07013425.1	14.9547	-1.13041	1.10116	-1.02656	0.304626	0.449968
AABR07013566.1	346.371	0.0484476	0.244062	0.198505	0.84265	0.902763
AABR07013583.1	108.793	0.436532	0.320985	1.35998	0.173837	0.295732
AABR07013654.1	34.0752	0.0443913	0.364278	0.121861	0.903009	0.942178
AABR07013776.1	95.1037	0.0836404	0.244747	0.341742	0.732545	0.825921
AABR07013798.1	3.67512	-1.60401	1.09556	-1.46411	0.143165	NA
AABR07013801.1	1.30545	-0.312041	1.78726	-0.174592	0.8614	NA
AABR07013802.1	245.534	0.0295014	0.234552	0.125778	0.899908	0.940439
AABR07013922.1	16.9168	0.343776	0.841192	0.408678	0.682776	0.789145
AABR07014132.1	13.6622	0.0225836	0.891506	0.025332	0.97979	0.98896
AABR07014239.1	7.74423	1.29336	1.84948	0.699312	0.484357	0.626979
AABR07014242.1	7.74423	1.29336	1.84948	0.699312	0.484357	0.626979
AABR07014289.1	113.61	-0.161386	0.656686	-0.245757	0.80587	0.877689
AABR07014298.1	2.47666	1.90926	1.81495	1.05196	0.292816	NA
AABR07014301.3	21.5086	0.159731	0.48649	0.328334	0.742659	0.832927
AABR07014550.1	165.141	-0.534864	1.71596	-0.3117	0.755269	0.84178
AABR07014676.1	12.4162	-0.206495	0.503993	-0.409719	0.682012	0.788443
AABR07014836.1	2.20457	3.94634	1.91868	2.0568	0.0397054	NA
AABR07014974.1	3.80066	1.13875	1.01457	1.12239	0.261696	NA
AABR07014996.1	12.7931	-0.22195	0.527512	-0.420748	0.673939	0.782223
AABR07015006.1	1.23696	3.72454	2.99724	1.24266	0.213994	NA
AABR07015006.2	6.14696	-0.449676	0.727575	-0.618048	0.536544	0.672965
AABR07015015.2	1.9348	-0.642723	1.72296	-0.373034	0.709123	NA
AABR07015033.1	6.14696	-0.449676	0.727575	-0.618048	0.536544	0.672965
AABR07015055.1	29.8447	0.136574	0.881585	0.154918	0.876886	0.92594
AABR07015057.1	28297.9	0.11081	0.722832	0.1533	0.878162	0.926884
AABR07015066.1	29.8447	0.136574	0.881585	0.154918	0.876886	0.92594
AABR07015067.1	4.34258	-0.255993	0.794353	-0.322266	0.747251	NA
AABR07015078.1	29.8447	0.136574	0.881585	0.154918	0.876886	0.92594
AABR07015080.2	29.8447	0.136574	0.881585	0.154918	0.876886	0.92594
AABR07015081.2	8544.52	0.174072	0.760269	0.228962	0.818899	0.886763
AABR07015112.1	44.1038	-0.819012	0.392418	-2.08709	0.0368798	0.0903014
AABR07015165.1	1108.35	-0.322811	0.0959467	-3.36449	0.000766863	0.00414287
AABR07015180.1	5.83327	-0.379248	2.10442	-0.180215	0.856984	0.912887
AABR07015294.1	42.067	-0.531663	0.407043	-1.30616	0.191498	0.318367
AABR07015559.1	105.964	0.0820414	0.293092	0.279917	0.779541	0.858689
AABR07015639.1	200.415	-0.326264	0.355618	-0.917457	0.358903	0.507368
AABR07015687.1	13.4663	-1.8816	0.570399	-3.29875	0.00097118	0.00498046
AABR07015743.1	3.16036	1.96365	1.92879	1.01807	0.308643	NA
AABR07015881.1	1.92987	0.950602	2.85354	0.333131	0.739035	NA
AABR07015941.1	8.04981	-0.692517	0.707051	-0.979444	0.327361	0.474429
AABR07016141.1	3.98076	1.23515	1.34161	0.920645	0.357236	NA
AABR07016412.1	10.9043	0.806884	0.587193	1.37414	0.169399	0.289979
AABR07016418.1	29.2949	-0.737236	0.419793	-1.75619	0.0790558	0.16376
AABR07016428.1	31.1254	1.66766	0.439958	3.79049	0.000150349	0.00111763
AABR07016623.1	1.65311	0.695025	1.40634	0.494208	0.621159	NA
AABR07016635.1	17.0917	0.103305	0.444797	0.232252	0.816342	0.884906
AABR07016640.1	4.46059	-0.953052	0.931594	-1.02303	0.306292	NA
AABR07017045.1	4.26821	0.127741	0.896917	0.142422	0.886746	NA
AABR07017104.2	7.20974	0.890581	2.05383	0.43362	0.664565	0.774437
AABR07017110.1	3.21204	0	4.08046	0	1	NA
AABR07017236.2	4.00818	-0.215022	0.880303	-0.244259	0.80703	NA
AABR07017250.1	2.21714	-0.536059	1.65457	-0.323987	0.745948	NA
AABR07017576.1	1.00163	-1.14183	2.13344	-0.535207	0.592507	NA
AABR07017634.1	1.47404	-0.558048	1.81348	-0.307722	0.758294	NA
AABR07017737.1	1.42133	-3.79268	1.85372	-2.04598	0.0407581	NA
AABR07017745.1	0.905584	-3.80213	3.76485	-1.0099	0.312542	NA
AABR07017868.4	1.30124	0.942024	1.81535	0.518921	0.603816	NA
AABR07017902.1	54.2023	0.854884	0.647949	1.31937	0.187045	0.31268
AABR07017902.3	2.23869	0.746512	1.2686	0.588453	0.556229	NA
AABR07017999.1	4.27015	-0.0836275	1.03227	-0.0810129	0.935432	NA
AABR07018038.1	782.374	0.410113	0.113612	3.60977	0.000306471	0.00197081
AABR07018038.3	248.422	0.557999	0.207401	2.69044	0.00713571	0.0245748
AABR07018050.1	2.98214	-1.46494	1.12143	-1.30631	0.191447	NA
AABR07018078.1	123.853	-0.630124	0.348744	-1.80684	0.0707875	0.150365
AABR07018132.1	52.6066	0.281957	2.01761	0.139748	0.888859	0.933576
AABR07018167.1	7.50571	0.0203331	0.818319	0.0248475	0.980177	0.989006
AABR07018244.1	9.14654	0.217024	0.770094	0.281815	0.778085	0.857798
AABR07018244.2	1.54611	-3.0344	1.61292	-1.88131	0.0599294	NA
AABR07018323.1	101.582	-0.545637	0.29972	-1.82049	0.0686847	0.146848
AABR07018331.1	1.48099	-0.0251936	1.56595	-0.0160884	0.987164	NA
AABR07018533.1	1.25054	-1.51422	3.82267	-0.396115	0.69202	NA
AABR07018556.1	157.107	-0.500375	0.37492	-1.33462	0.182001	0.306071
AABR07019061.1	4.461	0.246242	1.17652	0.209297	0.834217	NA
AABR07019083.1	238.516	0.457966	0.30584	1.49741	0.134288	0.244299
AABR07019341.2	74.2703	-0.648883	0.268467	-2.417	0.0156492	0.046141
AABR07019403.1	179.677	-0.195957	0.215367	-0.909875	0.362888	0.51128
AABR07020537.1	67.9463	-0.601889	0.308103	-1.95353	0.0507563	0.115784
AABR07020815.1	15.052	-0.300683	0.600377	-0.500824	0.616495	0.738182
AABR07020879.1	1.50111	-0.890117	1.36125	-0.653898	0.513177	NA
AABR07021086.1	5.75481	0.241925	0.742405	0.325867	0.744525	0.833906
AABR07021204.1	20.1123	-0.98452	0.412647	-2.38586	0.017039	0.0493243
AABR07021401.1	5.36643	-0.0823148	0.776569	-0.105998	0.915584	0.950508
AABR07021405.1	1.39228	1.35097	2.07821	0.650065	0.51565	NA
AABR07021405.2	1.21776	-0.165071	1.47707	-0.111756	0.911017	NA
AABR07021405.3	1.77653	0.279237	1.49508	0.186771	0.85184	NA
AABR07021424.1	6.88871	-0.270784	0.674086	-0.401705	0.687901	0.792884
AABR07021544.2	18.9106	-0.552413	0.413963	-1.33445	0.182056	0.306128
AABR07021573.2	6.46421	-0.878504	1.14424	-0.767764	0.442627	0.589844
AABR07021574.1	2.87081	-0.934666	1.21593	-0.768683	0.442082	NA
AABR07021586.1	15.5298	0.44215	0.553033	0.799501	0.424	0.572139
AABR07021591.1	3.96546	-0.852259	1.14047	-0.747289	0.454889	NA
AABR07021625.1	9.53559	-0.0392819	0.635267	-0.0618353	0.950694	0.971139
AABR07021635.1	2.49449	-1.40788	1.39342	-1.01038	0.312313	NA
AABR07021704.1	61.8578	1.35724	0.310044	4.37755	1.2e-05	0.000138812
AABR07021734.1	1.34613	-0.419569	2.50847	-0.167261	0.867164	NA
AABR07021759.1	26.3521	0.0389611	0.431013	0.0903941	0.927974	0.957187
AABR07021804.1	7.85712	0.568154	0.643849	0.882433	0.377543	0.526609
AABR07021812.1	1.26659	-0.977309	1.68898	-0.578638	0.562834	NA
AABR07021823.1	1222.27	-0.604068	0.156915	-3.84966	0.000118282	0.000923334
AABR07021863.1	1.55067	-0.483782	1.93316	-0.250255	0.80239	NA
AABR07021871.1	2670.81	-0.570519	0.125312	-4.55278	5.29e-06	7.1e-05
AABR07021955.1	428.831	0.0415676	0.284235	0.146244	0.883729	0.93036
AABR07021988.1	1532.11	0.216116	0.123255	1.7534	0.0795326	0.164612
AABR07022022.1	14.4732	0.451207	0.519578	0.868409	0.38517	0.533419
AABR07022144.1	157.236	0.250819	0.269792	0.929676	0.352539	0.500579
AABR07024139.1	9.65935	1.22106	0.860697	1.41868	0.155992	0.273665
AABR07024203.1	10.2732	-0.611683	1.84911	-0.330798	0.740797	0.831827
AABR07024203.3	1.61086	-0.155952	1.79188	-0.0870323	0.930646	NA
AABR07024381.1	221.43	0.460553	0.242925	1.89586	0.0579781	0.128487
AABR07024439.1	1.94073	1.04598	1.49196	0.701078	0.483254	NA
AABR07024463.1	12.2899	-1.15479	0.63382	-1.82195	0.0684631	0.146437
AABR07024498.1	7.34929	0.0984071	1.36092	0.0723095	0.942356	0.966674
AABR07024742.1	2.05543	0.589835	1.44433	0.408378	0.682996	NA
AABR07024757.1	107.801	-0.34098	0.430363	-0.792307	0.428181	0.57557
AABR07024795.1	11.2744	0.271213	0.703421	0.385563	0.699821	0.802033
AABR07024908.1	340.882	0.0424277	0.120858	0.351055	0.725547	0.82097
AABR07024954.1	1.06866	0.254758	2.40042	0.106131	0.915479	NA
AABR07024972.1	12.4093	0.256085	0.532236	0.48115	0.63041	0.749673
AABR07025010.1	12846.1	-0.0215361	0.231809	-0.0929045	0.925979	0.955988
AABR07025074.1	15.3548	1.06719	0.676206	1.5782	0.11452	0.216513
AABR07025089.1	10.5537	-0.141022	0.536905	-0.262657	0.792815	0.867914
AABR07025140.1	114.935	0.954128	0.467073	2.04278	0.0410741	0.0981064
AABR07025272.1	13.2896	1.12984	0.660467	1.71067	0.0871423	0.17654
AABR07025284.1	342.981	1.76885	0.367905	4.80789	1.53e-06	2.53e-05
AABR07025295.1	1022.63	0.967773	0.156833	6.17074	6.8e-10	3.24e-08
AABR07025316.1	135.677	-0.118483	0.253055	-0.468211	0.639634	0.75594
AABR07025527.1	4.28186	-0.793436	1.6388	-0.484158	0.628274	NA
AABR07025673.1	92.8669	0.29033	0.321381	0.903382	0.366323	0.514823
AABR07025757.1	20.9933	1.80505	0.492531	3.66484	0.000247493	0.00166818
AABR07025819.1	56.9603	-0.556337	1.2857	-0.43271	0.665226	0.774908
AABR07025896.1	2.09425	-0.236501	1.96443	-0.120392	0.904173	NA
AABR07025900.1	20.8051	-0.441958	0.582326	-0.758952	0.447882	0.59493
AABR07026002.1	34.7464	-0.0835601	0.325144	-0.256994	0.797183	0.871054
AABR07026012.1	70.6107	0.926381	0.314228	2.94812	0.00319715	0.0129506
AABR07026048.1	1.82935	0.843989	1.36943	0.616307	0.537692	NA
AABR07026058.1	5.73676	-0.776865	0.876335	-0.886493	0.375352	0.524098
AABR07026112.1	349.867	0.340467	0.195364	1.74273	0.0813803	0.167473
AABR07026137.2	54.7422	-0.662817	0.298873	-2.21772	0.026574	0.0699183
AABR07026236.1	2.00584	-1.13057	1.22214	-0.925074	0.354927	NA
AABR07026240.1	4.88414	-1.01482	0.891359	-1.13851	0.254907	0.394829
AABR07026271.1	11.6933	0.365108	0.584602	0.62454	0.532273	0.668995
AABR07026291.1	213.893	-0.241075	0.186873	-1.29004	0.197036	0.325446
AABR07026294.1	363.222	-0.163622	0.145356	-1.12567	0.260307	0.400891
AABR07026300.1	6.18529	0.377753	0.807994	0.467519	0.640128	0.756406
AABR07026311.1	1774.95	-1.09372	0.13754	-7.95201	1.84e-15	3.05e-13
AABR07026317.1	3.12689	5.91697	3.91681	1.51066	0.130874	NA
AABR07026424.1	874.417	0.35221	0.163051	2.16013	0.0307626	0.0783194
AABR07026536.1	889.18	1.78186	0.166216	10.7202	8.18e-27	5.89e-24
AABR07026557.1	44.8012	-0.529679	0.279388	-1.89585	0.0579794	0.128487
AABR07026654.1	944.572	1.99132	0.171078	11.6398	2.59e-31	2.6e-28
AABR07026797.1	133.587	-0.0777697	0.470176	-0.165406	0.868625	0.920989
AABR07026893.1	1.91522	0.645323	1.45724	0.442839	0.657882	NA
AABR07026929.1	3.65097	0.217132	1.00785	0.215439	0.829425	NA
AABR07026997.1	968.131	-0.502905	0.451561	-1.1137	0.265407	0.406754
AABR07027212.1	7.35987	0.874204	0.82483	1.05986	0.289209	0.433426
AABR07027235.1	29.9265	-0.701673	0.41568	-1.68801	0.091409	0.182685
AABR07027267.1	38.8198	0.865564	0.426868	2.02771	0.0425903	0.100882
AABR07027306.1	165.26	1.28985	0.358248	3.60045	0.000317662	0.00203231
AABR07027322.1	5.45583	-1.37186	1.16098	-1.18165	0.237346	0.374894
AABR07027502.1	1.66254	-1.20551	1.61634	-0.74583	0.45577	NA
AABR07027564.1	34.2126	0.0323698	0.31912	0.101435	0.919205	0.952566
AABR07027575.1	46.321	0.140975	0.273986	0.514533	0.606879	0.731063
AABR07027613.1	7.57364	-0.244027	0.716762	-0.340458	0.733512	0.826781
AABR07027753.2	20.3711	0.560087	1.02896	0.544322	0.58622	0.714052
AABR07027819.1	2.40432	-1.64599	1.22039	-1.34874	0.17742	NA
AABR07027819.2	39.2389	-0.106878	0.456419	-0.234167	0.814855	0.884033
AABR07027854.1	254.166	-0.456586	0.241957	-1.88706	0.0591525	0.130362
AABR07027866.1	1.19413	-1.48976	1.90273	-0.78296	0.433651	NA
AABR07027870.1	152.751	0.0623111	0.171016	0.364358	0.715591	0.81436
AABR07027872.1	44.226	0.618217	0.412841	1.49747	0.134271	0.244299
AABR07027902.1	864.043	-0.00104469	0.225077	-0.00464149	0.996297	0.998015
AABR07028013.1	135.335	-0.230265	0.182282	-1.26323	0.206506	0.33762
AABR07028027.1	290.371	0.621113	0.358875	1.73072	0.0835013	0.170802
AABR07028185.1	215.573	-0.189617	0.428943	-0.442057	0.658448	0.770067
AABR07028349.1	37.2748	1.82485	1.63533	1.11589	0.264469	0.405523
AABR07028352.1	173.571	-0.988374	0.521689	-1.89457	0.0581499	0.128734
AABR07028414.1	141.471	-0.327009	0.407424	-0.802625	0.422191	0.570207
AABR07028488.1	172.085	1.53155	0.327537	4.67596	2.93e-06	4.35e-05
AABR07028558.1	4.12964	-0.141868	0.783147	-0.181151	0.856249	NA
AABR07028615.1	227.879	0.0606291	0.384711	0.157597	0.874775	0.92486
AABR07028748.1	3.81958	-0.879404	1.07389	-0.818893	0.412847	NA
AABR07028749.1	5.09717	-0.867181	1.01171	-0.857141	0.391367	0.539104
AABR07028768.1	3.64632	1.08405	0.97313	1.11398	0.265287	NA
AABR07028769.1	585.378	-0.480656	0.208874	-2.30118	0.0213816	0.058936
AABR07028795.1	1.75433	-1.19367	1.53794	-0.776149	0.437661	NA
AABR07028805.1	20.9013	0.261704	0.457958	0.571459	0.567688	0.698541
AABR07028816.1	5.69038	2.21188	1.95995	1.12854	0.259092	0.399489
AABR07028839.1	3.49942	-1.6915	0.972118	-1.74001	0.0818571	NA
AABR07028839.2	3.8608	0.0371631	0.917289	0.0405141	0.967683	NA
AABR07028859.1	2.03314	-0.958877	1.32027	-0.726273	0.467671	NA
AABR07028887.1	107.962	0.751937	0.239422	3.14064	0.0016858	0.00774923
AABR07028902.1	196.388	0.489157	0.299165	1.63508	0.102033	0.198329
AABR07028979.1	134.641	-0.672221	0.243421	-2.76155	0.00575272	0.0207535
AABR07028989.1	104.393	-0.0416181	0.262043	-0.158822	0.873809	0.924227
AABR07028997.1	37.2495	0.380101	0.356	1.0677	0.285655	0.429421
AABR07029002.1	11.2871	-0.941506	0.596902	-1.57732	0.114722	0.216732
AABR07029002.2	199.244	-0.107257	0.235184	-0.456055	0.64835	0.762364
AABR07029006.1	1.49979	-0.951281	1.40424	-0.677435	0.49813	NA
AABR07029023.1	8.57717	1.0158	1.36524	0.744049	0.456847	0.602258
AABR07029195.1	12.2577	-0.814313	0.581493	-1.40038	0.161399	0.280221
AABR07029262.1	4.97188	-1.13913	0.768206	-1.48285	0.138115	0.24932
AABR07029272.1	96.0354	0.355027	0.462924	0.766923	0.443127	0.590354
AABR07029417.1	1.92591	1.20645	1.89682	0.636038	0.524752	NA
AABR07029573.1	22.7042	-0.441671	0.411686	-1.07283	0.283345	0.426926
AABR07029581.1	1023.8	-0.134602	0.149836	-0.898328	0.36901	0.517446
AABR07029596.1	38.2671	0.836594	0.285345	2.93187	0.00336923	0.013485
AABR07029605.1	748.929	0.556126	0.116021	4.79332	1.64e-06	2.67e-05
AABR07029613.1	2.7158	1.51834	1.13025	1.34337	0.179153	NA
AABR07029651.1	402.134	0.645956	0.155931	4.14257	3.43e-05	0.000332544
AABR07029661.1	200.835	0.712091	0.183522	3.88014	0.000104396	0.000833016
AABR07029742.1	266.053	-0.259605	0.133753	-1.94093	0.0522672	0.118312
AABR07029803.1	35.2399	0.187662	1.0136	0.185145	0.853115	0.910307
AABR07029809.1	85.148	-0.0959585	0.444208	-0.216021	0.828971	0.894017
AABR07029863.3	44.8274	-0.467099	0.292574	-1.59652	0.110373	0.210238
AABR07029955.1	1.3585	-0.851673	1.37096	-0.621222	0.534453	NA
AABR07030024.1	2.15384	-1.25773	1.4814	-0.849014	0.395873	NA
AABR07030029.1	1.60136	-0.418738	1.37201	-0.305201	0.760213	NA
AABR07030039.1	36.2593	-1.02866	0.399851	-2.57261	0.0100935	0.0325358
AABR07030122.1	2.13246	-0.382513	1.45499	-0.262897	0.79263	NA
AABR07030162.1	0.961356	-3.88567	3.68222	-1.05525	0.29131	NA
AABR07030375.2	5.46058	-2.89128	1.1474	-2.51985	0.0117405	0.0367468
AABR07030443.2	1564.52	0.922325	0.468782	1.96749	0.0491263	0.112894
AABR07030494.1	2.14329	-1.22637	1.16182	-1.05556	0.29117	NA
AABR07030520.1	1.30065	-0.927756	1.47813	-0.627656	0.53023	NA
AABR07030521.1	25.0467	1.35413	0.604555	2.23989	0.0250983	0.0668035
AABR07030544.1	22.9287	-0.0586062	0.371332	-0.157827	0.874593	0.924797
AABR07030603.1	32.124	0.325173	0.529358	0.614278	0.539032	0.675299
AABR07030603.2	5.53858	0.0519299	0.767801	0.0676346	0.946076	0.968431
AABR07030729.1	25.7834	-1.35774	0.412725	-3.28969	0.00100296	0.00511873
AABR07030771.1	1.2334	-1.89641	1.67133	-1.13467	0.256513	NA
AABR07030773.1	15.3643	-1.03621	0.62413	-1.66025	0.0968649	0.191061
AABR07030793.1	37.0943	-0.533335	0.59334	-0.898868	0.368723	0.517241
AABR07030861.1	415.368	-0.213452	0.114674	-1.86139	0.0626896	0.136425
AABR07030901.1	1.0345	-2.07819	2.20242	-0.943596	0.345376	NA
AABR07030903.1	53.5225	-0.309516	0.400492	-0.772837	0.439619	0.587078
AABR07030911.1	2.42075	-0.260751	1.99933	-0.130419	0.896235	NA
AABR07030926.1	11.944	-0.746391	0.527121	-1.41598	0.156783	0.274702
AABR07031089.1	4.91898	-0.492091	1.11086	-0.442981	0.65778	0.76968
AABR07031184.2	8.5527	-1.98496	0.757427	-2.62066	0.00877609	0.029039
AABR07031193.1	60.9251	-0.99186	0.439221	-2.25822	0.0239317	0.0642759
AABR07031445.1	249.606	0.865749	0.254891	3.39654	0.000682426	0.00376343
AABR07031480.1	56.6961	-0.105625	0.274283	-0.385094	0.700168	0.80227
AABR07031491.2	2330.4	0.430457	0.0681523	6.31609	2.68e-10	1.44e-08
AABR07031494.1	75.1013	0.348229	0.210553	1.65388	0.0981526	0.192845
AABR07031505.1	1.20007	-1.21792	1.7502	-0.695877	0.486506	NA
AABR07031666.1	5.51763	0.0719377	1.1718	0.0613907	0.951048	0.971435
AABR07031674.3	9.3746	0.313304	0.671185	0.466792	0.640649	0.756784
AABR07031734.2	29.1078	0.17935	0.375085	0.478159	0.632537	0.751374
AABR07031756.1	222.638	1.12454	0.227283	4.94774	7.51e-07	1.38e-05
AABR07031963.1	10.8108	-1.02579	0.619062	-1.65701	0.0975179	0.191998
AABR07031972.1	3.44471	0.65901	1.09454	0.602091	0.547114	NA
AABR07032097.1	31.2534	0.144371	0.324867	0.4444	0.656754	0.768918
AABR07032255.2	8.54255	-0.277581	0.88925	-0.312152	0.754925	0.841528
AABR07032317.1	4.16738	-0.339493	1.0626	-0.319494	0.749352	NA
AABR07032338.1	34.8408	0.0945461	0.459054	0.205959	0.836823	0.8987
AABR07032392.1	29.2817	0.640494	0.350403	1.82788	0.0675678	0.144781
AABR07032751.1	5.30495	-0.0708748	0.751888	-0.0942624	0.924901	0.955518
AABR07032821.1	322.663	-0.197095	0.168166	-1.17203	0.241187	0.379393
AABR07033020.1	1.87824	0.205069	1.71327	0.119694	0.904725	NA
AABR07033023.1	97.1041	0.503657	0.206924	2.43402	0.0149324	0.0445054
AABR07033047.1	1.29699	1.14987	1.44957	0.793249	0.427633	NA
AABR07033318.1	34.991	0.456447	0.461498	0.989057	0.322635	0.469545
AABR07033324.1	1386.04	-0.123327	0.197118	-0.62565	0.531545	0.668358
AABR07033540.1	98.8179	0.04184	0.270109	0.1549	0.8769	0.92594
AABR07033570.2	2.68587	-3.87756	3.63083	-1.06795	0.285542	NA
AABR07033653.1	1.51977	1.29336	2.26075	0.572092	0.567259	NA
AABR07033653.2	1.48726	2.1158	2.26707	0.933275	0.350678	NA
AABR07033657.1	138.145	0.707413	0.280794	2.51933	0.0117577	0.0367745
AABR07033745.1	87.2494	-0.578785	0.235499	-2.4577	0.0139831	0.0422177
AABR07033851.1	11.8936	-0.555298	0.541958	-1.02462	0.305545	0.450928
AABR07033887.1	357.044	1.48126	0.203561	7.27675	3.42e-13	3.69e-11
AABR07033979.1	5.77326	-1.29237	0.8722	-1.48174	0.138409	0.249632
AABR07034098.1	162.064	-0.366419	0.256851	-1.42658	0.153701	0.270494
AABR07034183.1	34.7304	0.193434	0.912423	0.212	0.832107	0.895992
AABR07034273.1	3.96465	5.21646	2.09869	2.48559	0.0129339	NA
AABR07034293.1	1.12041	-1.65036	2.54566	-0.648302	0.51679	NA
AABR07034295.1	2.4197	0.0398526	1.36745	0.0291438	0.97675	NA
AABR07034362.1	1.9867	-1.67927	1.41535	-1.18647	0.235437	NA
AABR07034362.2	64.5242	-1.12151	0.356711	-3.14403	0.00166638	0.007674
AABR07034393.1	40.8962	-0.908421	2.56551	-0.35409	0.723271	0.819028
AABR07034438.1	153.542	0.32547	0.253063	1.28612	0.198401	0.327238
AABR07034445.1	8.86205	0.510175	0.752751	0.677748	0.497932	0.638965
AABR07034573.3	177.272	-0.183644	0.22662	-0.810363	0.417731	0.566243
AABR07034592.1	116.17	-0.647384	0.322646	-2.00649	0.0448043	0.104896
AABR07034637.1	9.20093	-2.45147	0.874836	-2.80221	0.00507537	0.0187121
AABR07034639.1	2299.59	-0.597485	0.134347	-4.44732	8.69e-06	0.000107386
AABR07034641.1	1.21273	1.10136	2.07199	0.531547	0.59504	NA
AABR07034648.1	2.12218	0.0777132	1.25599	0.0618741	0.950663	NA
AABR07034657.1	112.293	-0.330388	0.187522	-1.76186	0.0780928	0.162188
AABR07034730.1	72.8286	-0.357387	0.333874	-1.07042	0.284428	0.428131
AABR07034739.1	7.70655	-0.971359	0.674933	-1.43919	0.150095	0.265728
AABR07034739.3	3.05462	0.631728	0.904539	0.698398	0.484928	NA
AABR07034767.1	1088.82	0.992321	0.276297	3.5915	0.000328778	0.00209014
AABR07034956.1	1.18456	0.730773	1.56716	0.466303	0.640998	NA
AABR07034980.1	2.92368	-4.10746	1.48964	-2.75735	0.00582711	NA
AABR07034980.2	49.9739	-0.810794	0.393757	-2.05912	0.0394825	0.0951478
AABR07035064.1	49.9739	-0.810794	0.393757	-2.05912	0.0394825	0.0951478
AABR07035074.1	6.3441	0.253318	1.0987	0.230561	0.817656	0.88599
AABR07035098.1	1.11231	-2.73989	1.98571	-1.3798	0.167648	NA
AABR07035218.1	431.373	0.0708168	0.233468	0.303325	0.761642	0.845864
AABR07035345.1	2.17685	0.25865	1.29573	0.199617	0.84178	NA
AABR07035357.1	11.6933	0.365108	0.584602	0.62454	0.532273	0.668995
AABR07035428.1	50.4331	0.481869	0.296877	1.62313	0.104562	0.202177
AABR07035428.2	290.422	-0.473664	0.174259	-2.71816	0.00656468	0.0230818
AABR07035456.1	1.77356	-0.494765	1.73649	-0.284923	0.775703	NA
AABR07035461.1	5.74805	0.433744	0.794339	0.546043	0.585036	0.713061
AABR07035479.1	27.3623	0.0442231	1.89439	0.0233442	0.981376	0.989433
AABR07035539.1	5541.89	-0.673443	0.131354	-5.12694	2.94e-07	6.32e-06
AABR07035776.1	38.4367	-0.89311	0.409706	-2.17988	0.0292666	0.0753104
AABR07035787.1	870.771	-0.732363	0.105737	-6.9263	4.32e-12	3.79e-10
AABR07035818.1	209.113	0.111011	0.191104	0.580892	0.561313	0.693983
AABR07035916.1	6.7623	1.04339	0.806876	1.29312	0.195971	0.324021
AABR07035935.1	7.03802	0.176107	0.688612	0.255742	0.79815	0.871575
AABR07036007.1	173.629	0.250671	0.37993	0.659781	0.509394	0.649371
AABR07036087.1	4.63484	-0.589074	3.06405	-0.192254	0.847544	NA
AABR07036336.2	1.147	-0.774416	1.9734	-0.392427	0.694743	NA
AABR07036375.1	1.68727	-1.66354	1.51166	-1.10048	0.271124	NA
AABR07036513.1	8.2682	0.00157898	0.693428	0.00227707	0.998183	0.999242
AABR07036550.1	6.11437	0.595977	0.772539	0.771452	0.440439	0.587734
AABR07036855.1	540.226	0.176908	0.219704	0.805211	0.420698	0.568953
AABR07037009.1	26.1066	-0.520266	0.382693	-1.35949	0.173992	0.295963
AABR07037058.1	2.42566	-0.68585	1.44782	-0.473713	0.635704	NA
AABR07037058.2	20.5371	-1.37998	0.464746	-2.96933	0.00298454	0.0122338
AABR07037203.1	2.12462	-0.430574	1.51078	-0.285002	0.775643	NA
AABR07037243.1	1.66859	2.25876	2.14687	1.05212	0.292744	NA
AABR07037302.1	1.12249	-2.49531	2.1989	-1.1348	0.25646	NA
AABR07037307.1	1.50007	-1.59661	1.72287	-0.926714	0.354075	NA
AABR07037343.1	1.7848	-0.542635	1.7015	-0.318916	0.74979	NA
AABR07037395.1	25.9437	-0.58185	0.586703	-0.991728	0.32133	0.468232
AABR07037395.2	7.85584	-3.14363	3.77225	-0.833357	NA	NA
AABR07037410.1	253.324	0.302297	0.17755	1.7026	0.0886422	0.17874
AABR07037412.1	16.2137	-0.223236	0.493019	-0.452794	0.650697	0.763815
AABR07037436.1	42.608	-0.988514	0.325913	-3.03306	0.00242086	0.010318
AABR07037489.1	58.3386	0.153328	0.303038	0.505969	0.612878	0.73525
AABR07037520.1	43.2452	-0.867594	0.296773	-2.92343	0.00346199	0.0137832
AABR07037536.1	5.33804	6.68708	3.91265	1.70909	0.0874338	0.176941
AABR07037645.1	67.8506	-0.294428	0.616785	-0.477359	0.633106	0.751588
AABR07037923.1	46.3219	-0.0990452	0.985168	-0.100536	0.919918	0.952858
AABR07037960.1	3.38433	-1.24117	1.36166	-0.91151	0.362027	NA
AABR07037995.1	9.76385	0.686905	0.63543	1.08101	0.279693	0.422857
AABR07037998.1	1.64645	-0.209585	1.3171	-0.159127	0.873569	NA
AABR07038021.1	22.3835	0.737882	0.471187	1.56601	0.117347	0.220244
AABR07038029.1	3.02021	0.612811	1.19601	0.512378	0.608387	NA
AABR07038349.1	1.85753	-0.021838	1.45842	-0.0149737	0.988053	NA
AABR07038477.1	15.1362	0.182496	0.595855	0.306277	0.759394	0.844272
AABR07038567.1	46.9408	-0.554704	0.440512	-1.25922	0.207949	0.339465
AABR07038578.1	1.30527	0.399948	1.54272	0.259248	0.795444	NA
AABR07038766.1	2.47771	-0.214264	1.16296	-0.18424	0.853826	NA
AABR07038798.1	10.4405	-0.768437	0.528273	-1.45462	0.145774	0.259752
AABR07038842.1	7.9122	-0.00243417	0.675245	-0.00360488	0.997124	0.99866
AABR07038848.1	2.1924	-0.811297	1.62308	-0.499851	0.61718	NA
AABR07038850.1	2.34812	-1.2063	1.24754	-0.96695	0.333569	NA
AABR07038873.1	4.91609	-0.449943	0.927278	-0.48523	0.627513	0.747346
AABR07038879.1	3.59697	-0.162862	1.18621	-0.137296	0.890797	NA
AABR07038881.1	2.59877	-0.629577	1.19308	-0.527691	0.597714	NA
AABR07038895.2	5.56276	0.00736292	0.888622	0.00828577	0.993389	0.996679
AABR07038926.1	82.8869	0.503143	0.236431	2.12808	0.0333308	0.0832307
AABR07038930.1	7.12242	0.828701	0.792987	1.04504	0.296006	0.441014
AABR07038948.1	3.25137	-1.47358	1.08108	-1.36305	0.172865	NA
AABR07038948.2	1188.75	-0.39764	0.360682	-1.10247	0.270259	0.412349
AABR07038972.1	2.11959	0.681909	1.25772	0.542178	0.587696	NA
AABR07039029.1	1.16816	0.271931	1.77992	0.152777	0.878574	NA
AABR07039092.1	1.57059	1.20802	1.42751	0.84624	0.397419	NA
AABR07039111.1	2.86011	0.320386	1.02427	0.312793	0.754438	NA
AABR07039112.2	6.19207	-1.17217	1.06363	-1.10205	0.270442	0.41254
AABR07039133.1	1.41874	-2.32433	1.91055	-1.21657	0.223767	NA
AABR07039133.2	3.08039	-0.00134102	0.949647	-0.00141212	0.998873	NA
AABR07039153.1	1.70058	-1.45423	1.7914	-0.811787	0.416914	NA
AABR07039184.1	2.96167	-0.865898	0.939051	-0.922099	0.356477	NA
AABR07039210.2	68.6705	0.288341	0.339524	0.849251	0.395741	0.543629
AABR07039218.1	284.185	-0.181506	0.168981	-1.07412	0.282769	0.426313
AABR07039218.2	4.11082	-0.903517	1.06175	-0.850974	0.394784	NA
AABR07039303.4	46.4154	-0.480579	0.348462	-1.37914	0.16785	0.288147
AABR07039304.1	68.8498	1.10545	0.260542	4.24288	2.21e-05	0.000229083
AABR07039307.1	17.7048	5.52035	3.0396	1.81614	0.0693489	0.148017
AABR07039334.1	6.41532	1.15976	0.828113	1.40049	0.161367	0.280198
AABR07039336.2	19.2068	0.687172	0.429047	1.60162	0.109239	0.208683
AABR07039345.1	799.469	-0.852293	0.160643	-5.30551	1.12e-07	2.77e-06
AABR07039354.1	7.37291	-0.530835	1.14384	-0.46408	0.642591	0.75807
AABR07039356.1	2.68608	2.39598	1.73874	1.378	0.168203	NA
AABR07039438.1	24.3019	-0.571266	0.455685	-1.25364	0.209972	0.342065
AABR07039446.2	737.69	-0.582567	0.268925	-2.16628	0.0302897	0.0773501
AABR07039447.1	1.83793	-2.95476	1.73123	-1.70674	0.0878701	NA
AABR07039470.3	6.19039	0.572928	0.73338	0.781216	0.434675	0.581763
AABR07039648.1	1.43524	-0.0403716	1.64141	-0.0245957	0.980377	NA
AABR07039694.1	263.073	-0.167524	0.321677	-0.520783	0.602518	0.726978
AABR07039778.1	113.099	0.443886	0.255245	1.73906	0.0820238	0.16843
AABR07039936.1	34.8753	-0.370597	0.335295	-1.10529	0.269035	0.410939
AABR07040095.1	10.7658	-0.0363722	0.756716	-0.0480659	0.961664	0.978441
AABR07040412.1	48.6352	-0.0106957	0.426102	-0.0251012	0.979974	0.988961
AABR07040622.1	9.85532	-0.668376	0.701177	-0.95322	0.340479	0.488129
AABR07040624.1	198.716	0.0438684	0.175184	0.250414	0.802267	0.874504
AABR07040840.1	31.4926	1.58211	0.341704	4.63006	3.66e-06	5.18e-05
AABR07040855.1	145.691	-0.23286	0.203685	-1.14323	0.252941	0.392549
AABR07040864.1	122.446	0.30931	0.191089	1.61867	0.105518	0.203435
AABR07040936.1	15.5584	-1.00347	0.671887	-1.49351	0.135304	0.24561
AABR07040938.1	1.49515	-1.07805	2.15767	-0.499637	0.617331	NA
AABR07040944.1	1.12353	0.659097	1.84895	0.356471	0.721488	NA
AABR07041089.1	1.14319	0.21657	2.05017	0.105635	0.915872	NA
AABR07041109.1	19.2328	1.27064	0.696296	1.82486	0.068022	0.145596
AABR07041246.1	2.74475	0.891496	1.44702	0.616091	0.537835	NA
AABR07041403.1	2.33274	0.328916	1.02001	0.322464	0.747101	NA
AABR07041451.1	1.90427	-0.701419	2.16191	-0.324444	0.745602	NA
AABR07041453.1	6.63155	-0.552872	0.693546	-0.797167	0.425354	0.573556
AABR07041586.1	29.3423	-0.292519	0.719694	-0.406449	0.684413	0.790432
AABR07041778.1	22.6179	-0.996087	0.462666	-2.15293	0.0313242	0.0792816
AABR07041972.1	7.0626	-3.21349	1.08842	-2.95243	0.00315288	0.0127988
AABR07042385.1	34.0752	0.0443913	0.364278	0.121861	0.903009	0.942178
AABR07042542.1	80.0072	-0.17028	0.335101	-0.508145	0.611352	0.734351
AABR07042611.1	8.42846	-0.5423	0.647199	-0.837918	0.402077	0.550523
AABR07042789.1	12.284	0.802761	0.788581	1.01798	0.308687	0.454515
AABR07042821.1	2188.03	-0.715544	0.157423	-4.54535	5.48e-06	7.31e-05
AABR07042859.1	146.165	0.322649	0.542905	0.5943	0.552311	0.6863
AABR07042903.1	581.431	-0.834318	0.191897	-4.34774	1.38e-05	0.000154818
AABR07042936.1	109.916	1.33147	0.590343	2.25542	0.0241067	0.0646541
AABR07043031.1	8.08025	1.11373	0.624817	1.78248	0.0746706	0.156631
AABR07043115.1	10.3987	1.56585	1.60878	0.973315	0.330397	0.477683
AABR07043169.1	7.93875	0.410705	0.631114	0.650762	0.5152	0.654576
AABR07043347.1	23.3918	0.114517	0.410309	0.279099	0.780169	0.859113
AABR07043421.1	2567.53	1.03665	0.389998	2.65809	0.00785847	0.0265256
AABR07043564.1	2.40706	0.345299	1.71871	0.200906	0.840772	NA
AABR07043601.1	14.8026	0.850498	0.541809	1.56974	0.116476	0.2191
AABR07043626.3	5.19585	0.107845	0.974807	0.110632	0.911908	0.9478
AABR07043626.4	17.9146	1.32803	0.665596	1.99525	0.0460154	0.107032
AABR07043654.1	1.22027	3.28896	3.05516	1.07653	0.281692	NA
AABR07043659.1	2.66077	-0.076689	1.17782	-0.0651112	0.948085	NA
AABR07043748.1	2112.33	-0.501209	0.179846	-2.78688	0.00532186	0.0194358
AABR07043861.1	1.81397	-0.0565801	1.41859	-0.0398847	0.968185	NA
AABR07043897.1	11.0023	0.197309	0.687283	0.287086	0.774047	0.854927
AABR07043951.1	289.09	0.0611842	0.125186	0.488744	0.625023	0.745497
AABR07044080.2	2.73475	-0.308886	1.0657	-0.289844	0.771936	NA
AABR07044322.1	116.32	6.36927	1.35194	4.71121	2.46e-06	3.78e-05
AABR07044346.1	2.87687	1.25487	1.17899	1.06436	0.287166	NA
AABR07044354.1	4.33899	-0.550009	0.864674	-0.636088	0.524719	NA
AABR07044360.1	2.15172	-1.45362	1.41345	-1.02842	0.30375	NA
AABR07044361.1	2.88939	2.34406	1.41259	1.6594	0.0970346	NA
AABR07044362.1	25.1269	-1.16876	0.630689	-1.85315	0.0638607	0.138316
AABR07044362.2	1.78298	0.228067	1.37682	0.165647	0.868434	NA
AABR07044362.6	4.2613	0.30225	0.971151	0.311228	0.755627	NA
AABR07044362.7	5.57429	0.11473	1.10378	0.103943	0.917215	0.951482
AABR07044364.1	137.894	1.0711	0.485878	2.20445	0.0274925	0.0718467
AABR07044375.1	109.553	0.450554	0.180619	2.4945	0.0126134	0.0389238
AABR07044383.1	226.934	0.732255	0.556951	1.31476	0.188592	0.314528
AABR07044388.1	90.548	-1.24162	0.249992	-4.96664	6.81e-07	1.28e-05
AABR07044397.1	92.8278	-0.407484	0.390945	-1.04231	0.29727	0.442172
AABR07044404.1	109.533	-0.140396	0.22707	-0.618293	0.536382	0.672965
AABR07044420.2	124.374	-0.102561	0.421502	-0.243323	0.807755	0.878843
AABR07044421.1	393.36	-0.557288	0.277487	-2.00834	0.0446074	0.10463
AABR07044473.1	1.4133	0	4.08046	0	1	NA
AABR07044509.1	1.68727	-1.66354	1.51166	-1.10048	0.271124	NA
AABR07044570.1	22.0507	-0.150185	0.434503	-0.345648	0.729607	0.823978
AABR07044596.1	16.1261	1.76009	0.529771	3.32235	0.000892618	0.00464931
AABR07044711.1	11774.6	-0.642709	0.0735569	-8.73758	2.38e-18	6.66e-16
AABR07044759.1	49.86	-0.664578	0.380391	-1.74709	0.0806216	0.166228
AABR07044900.1	127.737	2.53519	0.38392	6.60343	4.02e-11	2.76e-09
AABR07044914.1	506.936	-0.142224	0.265632	-0.535416	0.592362	0.719321
AABR07044925.1	326.772	0.139974	0.155493	0.900195	0.368016	0.516721
AABR07044940.1	17.0777	-7.8029	3.39746	-2.29669	0.0216367	0.059498
AABR07044959.1	19.2444	0.682548	0.485386	1.4062	0.159666	0.278364
AABR07045047.1	96.6594	-0.383614	0.256835	-1.49362	0.135276	0.24561
AABR07045058.1	88.1626	-1.09418	0.473645	-2.31013	0.0208808	0.0578406
AABR07045071.1	3.59478	-0.103023	1.42209	-0.0724449	0.942248	NA
AABR07045307.1	115.936	-0.0271045	0.250469	-0.108215	0.913825	0.949269
AABR07045321.1	6.10717	-1.21653	1.02935	-1.18185	0.237265	0.374806
AABR07045322.1	13.4397	0.332609	0.7134	0.466231	0.64105	0.75708
AABR07045337.1	1.24015	-1.35416	1.66471	-0.813449	0.415961	NA
AABR07045405.1	6.68362	-0.218351	0.801802	-0.272325	0.785372	0.863081
AABR07045454.1	231.07	-0.623607	0.197944	-3.15043	0.00163033	0.00754246
AABR07045485.1	162.091	-0.467854	0.264548	-1.76851	0.0769763	0.160332
AABR07045621.1	1.52183	0.231009	1.62743	0.141947	0.887122	NA
AABR07045684.1	57.6382	-0.199124	0.383413	-0.519346	0.603519	0.727837
AABR07046669.1	1.80344	3.32507	2.54264	1.30772	0.190967	NA
AABR07046707.1	733.526	0.934121	0.143976	6.48805	8.7e-11	5.32e-09
AABR07046763.1	1.29631	-0.1967	2.67612	-0.073502	0.941407	NA
AABR07046778.1	10.2725	0.23893	0.64227	0.372008	0.709887	0.809673
AABR07047011.1	156.3	-0.0117344	0.19905	-0.0589521	0.95299	0.97263
AABR07047036.1	24.8531	-0.383668	0.404566	-0.948343	0.342955	0.490671
AABR07047262.1	14.9559	1.05369	0.917033	1.14902	0.250549	0.389878
AABR07047576.1	9.4541	5.61698	2.101	2.67348	0.00750681	0.0255845
AABR07047593.1	1.15079	-0.647751	1.771	-0.365754	0.714549	NA
AABR07047744.1	91.4915	-0.0846151	0.263662	-0.320922	0.748269	0.836672
AABR07047744.2	2.98504	0.987521	1.02556	0.962908	0.335594	NA
AABR07047750.1	2.98504	0.987521	1.02556	0.962908	0.335594	NA
AABR07047750.2	91.4915	-0.0846151	0.263662	-0.320922	0.748269	0.836672
AABR07047771.1	379.713	0.358273	0.204903	1.7485	0.0803778	0.16593
AABR07047789.1	585.114	-0.199261	0.210433	-0.946912	0.343683	0.491371
AABR07047844.1	1.4133	0	4.08046	0	1	NA
AABR07047872.1	1.29195	0.343684	1.44336	0.238113	0.811793	NA
AABR07048031.1	1.81616	-1.2208	2.71196	-0.450153	0.6526	NA
AABR07048228.1	57.0596	0.876634	0.646319	1.35635	0.174988	0.297222
AABR07048303.1	5.21189	0	4.08046	0	1	1
AABR07048308.2	11.9738	-0.0887712	1.27563	-0.0695903	0.94452	0.967712
AABR07048397.1	8.72631	0.913025	1.69502	0.53865	0.590128	0.717473
AABR07048397.2	4.36221	0.172933	0.896574	0.192882	0.847052	NA
AABR07048419.2	56.8848	1.23839	0.261872	4.72901	2.26e-06	3.51e-05
AABR07048420.5	7.28287	0.0588938	0.677878	0.0868797	0.930767	0.959033
AABR07048420.6	34.4124	0.773033	0.378968	2.03983	0.0413668	0.0986398
AABR07048421.1	17.7733	1.33226	0.582499	2.28715	0.0221869	0.0606136
AABR07048453.1	1.81988	-0.889375	2.77122	-0.320932	0.748262	NA
AABR07048463.2	22.8867	0.767311	0.482943	1.58883	0.1121	0.212775
AABR07048463.3	2.12484	3.99538	1.99705	2.00064	0.0454314	NA
AABR07048469.2	13.3426	0.463685	0.543773	0.852719	0.393815	0.541568
AABR07048473.1	2.42789	-0.471973	1.64915	-0.286191	0.774732	NA
AABR07048487.1	6.17677	-0.00537523	0.823953	-0.0065237	0.994795	0.997171
AABR07048637.1	97.2425	-0.292301	0.309585	-0.944171	0.345082	0.4929
AABR07048698.1	89.4639	1.14481	0.377756	3.03054	0.00244114	0.0103752
AABR07048770.1	3.76956	-0.894203	1.09005	-0.820332	0.412027	NA
AABR07048992.1	192.943	-1.21929	0.486015	-2.50874	0.0121162	0.0376961
AABR07049038.2	9.96506	0.436913	0.658493	0.663504	0.507008	0.647094
AABR07049043.1	3.44099	-1.1284	1.36386	-0.827359	0.408034	NA
AABR07049064.1	11.0505	-0.222502	0.577878	-0.385033	0.700213	0.80227
AABR07049074.1	2.12346	-0.219144	1.21162	-0.180868	0.856471	NA
AABR07049085.1	264.574	0.393829	0.192881	2.04182	0.0411693	0.0982715
AABR07049149.1	9.31035	6.55395	1.7784	3.6853	0.000228432	0.00156484
AABR07049223.1	25.8916	-0.248151	0.543773	-0.456351	0.648138	0.762174
AABR07049286.1	105.928	1.92978	1.34376	1.4361	0.150974	0.26694
AABR07049320.1	1.50888	2.91241	3.18005	0.915839	0.359751	NA
AABR07049329.1	24.3698	-0.63022	0.498117	-1.2652	0.205799	0.33665
AABR07049466.1	3.58642	-0.386888	1.25594	-0.308047	0.758047	NA
AABR07049497.1	1.11245	-1.36345	1.93142	-0.70593	0.480232	NA
AABR07049516.1	16.1978	-0.246483	0.609386	-0.404477	0.685862	0.791553
AABR07049524.1	1.12406	0.845548	1.96455	0.430403	0.666903	NA
AABR07049541.1	23.7669	-0.474692	0.376598	-1.26047	0.207498	0.338876
AABR07049554.2	9.25195	1.48224	0.629941	2.35298	0.0186238	0.0529979
AABR07049578.1	2.89473	-0.201379	1.2659	-0.15908	0.873606	NA
AABR07049579.2	3.81703	0.0535351	0.884796	0.0605056	0.951753	NA
AABR07049753.1	7.3721	-0.815126	0.72067	-1.13107	0.258027	0.398395
AABR07049768.1	55.5628	-0.422184	0.362874	-1.16345	0.244649	0.382945
AABR07049792.1	1.20335	1.96484	2.1385	0.918796	0.358202	NA
AABR07049821.1	3.16067	-0.257384	1.0801	-0.238296	0.811652	NA
AABR07049821.2	43.6317	-0.870232	0.287885	-3.02285	0.00250407	0.0106009
AABR07049918.1	2.86772	0.895464	1.12336	0.797128	0.425377	NA
AABR07049960.1	1.86168	-0.616262	1.93862	-0.317888	0.75057	NA
AABR07050116.1	3.38464	-2.39276	1.30967	-1.827	0.0677	NA
AABR07050225.1	85.2258	-0.679413	0.243777	-2.78703	0.00531931	0.0194341
AABR07050298.1	1.28112	-0.229491	1.68577	-0.136134	0.891716	NA
AABR07050391.2	2.692	-0.614378	1.02597	-0.598827	0.549288	NA
AABR07050399.1	2.692	-0.614378	1.02597	-0.598827	0.549288	NA
AABR07050449.1	46.1056	0.792713	0.659497	1.202	0.229365	0.36573
AABR07050530.1	1.4133	0	4.08046	0	1	NA
AABR07050545.1	66.1776	-0.0293994	0.356215	-0.0825327	0.934223	0.960942
AABR07050646.1	18.6261	2.23684	0.563238	3.9714	7.15e-05	0.000611488
AABR07050879.1	108.333	-0.181515	0.401395	-0.45221	0.651117	0.764012
AABR07051240.1	2.36161	-2.92973	1.46679	-1.99738	0.0457837	NA
AABR07051376.1	102.619	1.15048	0.211348	5.44351	5.22e-08	1.43e-06
AABR07051399.1	1.53005	0.349947	1.40327	0.24938	0.803067	NA
AABR07051450.1	3024.4	1.29011	0.438307	2.9434	0.00324626	0.0131074
AABR07051501.1	13.3943	0.794164	0.776192	1.02315	0.306235	0.451639
AABR07051518.1	6.62422	0.0365502	0.821162	0.0445103	0.964498	0.979646
AABR07051551.2	1.27611	-0.902067	2.17109	-0.41549	0.677783	NA
AABR07051796.1	5.17192	0.505538	0.83723	0.603823	0.545962	0.680697
AABR07051947.1	51.4326	-0.480411	0.270772	-1.77423	0.0760251	0.158898
AABR07052084.1	1.36188	-2.01023	2.21156	-0.908965	0.363369	NA
AABR07052085.1	2.4885	-0.919625	1.70316	-0.539953	0.589229	NA
AABR07052125.2	11.5186	-2.89217	1.32918	-2.17592	0.0295616	0.0759143
AABR07052430.1	14.1753	-0.178193	0.525544	-0.339064	0.734562	0.827409
AABR07052486.1	52.7934	0.167617	0.475324	0.352637	0.724361	0.820077
AABR07052498.1	3.48507	-0.339975	1.04159	-0.326399	0.744122	NA
AABR07052519.1	10.7797	-0.381955	0.514075	-0.742996	0.457484	0.602835
AABR07052523.1	81.8473	-0.720519	0.349418	-2.06205	0.0392026	0.0946236
AABR07052585.1	372.707	-0.248303	0.615924	-0.40314	0.686845	0.792272
AABR07052585.2	4621.81	0.838812	0.38001	2.20734	0.0272903	0.0714295
AABR07052587.1	3.35127	-1.20585	1.75317	-0.687813	0.49157	NA
AABR07052611.2	2.34356	-0.324025	1.10916	-0.292136	0.770183	NA
AABR07052664.1	58.9826	0.443856	0.496096	0.894698	0.370948	0.519534
AABR07052744.1	31.2458	-0.126094	0.405515	-0.310949	0.755839	0.842145
AABR07052894.1	5.97772	-0.696764	0.802845	-0.867869	0.385466	0.533682
AABR07052953.1	2.26627	-0.398878	2.50484	-0.159243	0.873478	NA
AABR07053136.1	25.6915	0.0929852	0.530231	0.175367	0.860791	0.915448
AABR07053166.1	1188.67	0.401503	1.09385	0.367056	0.713577	0.812558
AABR07053179.1	144.488	-0.165859	0.622712	-0.26635	0.78997	0.865615
AABR07053185.1	82.5943	0.106897	0.225611	0.473813	0.635634	0.753334
AABR07053188.1	17.0752	-0.361988	0.462901	-0.781999	0.434215	0.581404
AABR07053472.1	179.28	0.158482	0.174171	0.909921	0.362864	0.51128
AABR07053500.1	63.3784	0.273672	0.299866	0.912649	0.361427	0.509649
AABR07053500.2	2.47231	0.322142	1.41578	0.227537	0.820006	NA
AABR07053509.2	39.0647	0.698343	0.395531	1.76558	0.0774661	0.161126
AABR07053516.1	198.297	0.125876	0.21959	0.573232	0.566488	0.697605
AABR07053613.1	1.67561	-4.67962	3.92185	-1.19322	0.232785	NA
AABR07053635.1	1.5763	-1.01977	1.54683	-0.659265	0.509726	NA
AABR07053635.2	2.54803	-0.169117	1.10544	-0.152987	0.878409	NA
AABR07053669.1	2.73622	-0.632561	1.64633	-0.384224	0.700812	NA
AABR07053681.1	28.1433	0.214182	0.336994	0.635564	0.52506	0.663352
AABR07053687.1	803.647	-0.274969	0.187133	-1.46938	0.141729	0.254345
AABR07053734.2	9.62714	0.0389977	0.774131	0.0503761	0.959823	0.977358
AABR07053741.1	193.094	0.128476	0.172115	0.746455	0.455392	0.601338
AABR07053879.1	7.04562	0.60016	0.793485	0.756359	0.449434	0.596232
AABR07054000.1	10.0588	1.49564	0.68403	2.18651	0.0287783	0.0742816
AABR07054189.1	60.6549	0.313629	0.388322	0.80765	0.419292	0.567574
AABR07054262.1	47.4616	0.363229	0.389333	0.932951	0.350845	0.49906
AABR07054266.1	2.24746	-2.37707	1.66185	-1.43038	0.152609	NA
AABR07054319.1	24.5547	-1.15269	0.462722	-2.4911	0.0127349	0.0392654
AABR07054355.1	1.17084	-0.351848	1.79547	-0.195964	0.844638	NA
AABR07054358.1	1.17084	-0.351848	1.79547	-0.195964	0.844638	NA
AABR07054362.1	254.3	-0.924585	0.232241	-3.98115	6.86e-05	0.000590951
AABR07054367.1	27.1917	0.487122	0.368884	1.32053	0.186658	0.312303
AABR07054368.1	53.8297	-0.543579	0.403801	-1.34616	0.178252	0.301646
AABR07054370.1	534.254	0.115377	0.134149	0.860062	0.389755	0.537697
AABR07054400.1	357.095	0.734734	0.153295	4.79294	1.64e-06	2.67e-05
AABR07054456.1	2.26835	0.142025	1.20687	0.117681	0.906321	NA
AABR07054469.1	5.95657	-0.434195	0.70081	-0.619562	0.535546	0.672214
AABR07054578.1	27.992	0.521119	0.391969	1.32949	0.183686	0.308458
AABR07054614.1	1195.66	-0.0365123	0.197073	-0.185273	0.853015	0.910307
AABR07055280.1	1.15015	-4.1407	3.92867	-1.05397	0.291897	NA
AABR07055288.1	1.81641	0.560102	1.8025	0.310736	0.756001	NA
AABR07055492.1	5.08154	-0.0816452	1.17144	-0.0696963	0.944435	0.967712
AABR07055527.1	1.98305	-2.53192	1.65929	-1.52591	0.127033	NA
AABR07055767.1	1.19246	-0.319287	1.65812	-0.19256	0.847304	NA
AABR07055776.1	208.783	-0.138047	0.183358	-0.75288	0.451522	0.598109
AABR07055792.1	4.96907	0.99302	1.12813	0.880237	0.378731	0.527548
AABR07055805.1	4.96907	0.99302	1.12813	0.880237	0.378731	0.527548
AABR07055826.1	35.1138	0.124213	0.544192	0.228252	0.81945	0.886979
AABR07055864.2	2.44641	1.04151	2.38564	0.436575	0.66242	NA
AABR07055917.1	18.98	0.0627627	0.414809	0.151305	0.879735	0.927656
AABR07055919.1	93.5214	-0.407431	0.208247	-1.95648	0.0504092	0.11528
AABR07055943.1	4.99593	0.625744	1.06332	0.58848	0.55621	0.68933
AABR07056636.1	3.34433	-0.795499	1.24265	-0.640164	0.522066	NA
AABR07056643.2	1.112	-2.48702	2.51985	-0.986972	0.323657	NA
AABR07056686.1	1.99527	4.19461	1.88731	2.22253	0.0262473	NA
AABR07056767.1	49.4907	-0.189279	0.681104	-0.2779	0.781089	0.859687
AABR07056817.1	26.8333	-0.149295	0.983361	-0.151821	0.879328	0.927596
AABR07056845.1	40.2423	-0.573768	0.299707	-1.91443	0.0555649	0.124416
AABR07057108.1	28.472	0.883058	1.03982	0.849243	0.395746	0.543629
AABR07057196.1	142.423	0.199951	0.192946	1.0363	0.300061	0.445272
AABR07057264.1	4.48028	-2.31929	1.08964	-2.1285	0.0332958	NA
AABR07057423.1	27.4203	-0.135606	0.392279	-0.345688	0.729577	0.823978
AABR07057495.1	20.8219	1.00439	0.489247	2.05293	0.0400798	0.0962795
AABR07057530.1	2.86873	-1.00676	1.19724	-0.840898	0.400405	NA
AABR07057586.1	9.02149	-0.920501	0.602789	-1.52707	0.126744	0.233687
AABR07057617.1	1.06855	0.4207	1.60093	0.262785	0.792717	NA
AABR07057902.1	3.36677	-0.09402	0.934147	-0.100648	0.91983	NA
AABR07057961.1	7.35242	-0.689886	0.666143	-1.03564	0.300369	0.44551
AABR07058017.1	1.06918	-2.92655	2.83152	-1.03356	0.301341	NA
AABR07058091.2	141.663	-0.644288	0.248349	-2.59429	0.00947877	0.0309104
AABR07058102.1	65.9862	0.434949	0.385361	1.12868	0.259033	0.399459
AABR07058124.4	4.95772	-0.201218	0.834637	-0.241084	0.80949	0.879918
AABR07058157.1	1.76836	1.73749	1.5061	1.15364	0.248648	NA
AABR07058192.1	46.5742	0.122734	0.404427	0.303476	0.761527	0.845864
AABR07058233.2	48.903	0.345218	0.634228	0.544311	0.586227	0.714052
AABR07058287.1	1.35586	4.23227	3.8433	1.10121	0.270806	NA
AABR07058360.1	18.8079	-0.310603	0.407242	-0.762699	0.445643	0.592765
AABR07058366.1	1.21573	1.58014	1.59852	0.9885	0.322908	NA
AABR07058410.1	9.29649	0.452102	0.680942	0.663936	0.506731	0.646795
AABR07058423.4	3.32599	0.403607	0.900828	0.44804	0.654124	NA
AABR07058441.1	1.51302	-2.00658	1.90378	-1.054	0.291883	NA
AABR07058450.1	6.62724	-0.276757	0.81173	-0.340947	0.733144	0.82649
AABR07058464.1	329.017	0.754101	0.349271	2.15907	0.0308445	0.0784353
AABR07058479.1	23.527	1.17284	0.506925	2.31363	0.0206881	0.057412
AABR07058514.1	17.0028	-0.362839	0.494528	-0.733708	0.463127	0.607951
AABR07058519.1	6.38446	-0.609625	0.840694	-0.725145	0.468363	0.61231
AABR07058745.1	29.0211	0.359912	0.825131	0.436188	0.6627	0.773338
AABR07058831.1	3.40828	-1.62153	1.21533	-1.33423	0.182127	NA
AABR07058884.1	8.69216	0.547811	0.668464	0.819507	0.412497	0.560927
AABR07058884.2	41.0271	0.8005	0.371101	2.15709	0.0309983	0.0786808
AABR07058886.1	129.743	0.36843	0.337546	1.09149	0.275056	0.417433
AABR07058914.1	20.1146	0.0568301	0.451552	0.125855	0.899847	0.940439
AABR07058930.1	1.20093	-1.00371	1.72932	-0.580411	0.561637	NA
AABR07059041.1	396.676	0.275354	0.153026	1.79939	0.0719572	0.152314
AABR07059198.1	42.5997	0.417799	0.297512	1.40431	0.160227	0.27886
AABR07059215.1	5.73142	0.927728	0.884959	1.04833	0.294487	0.439331
AABR07059232.1	59.9543	0.476554	0.271418	1.75579	0.0791235	0.163878
AABR07059308.1	343.043	-0.292264	0.398417	-0.733563	0.463215	0.607951
AABR07059552.1	7.87461	-0.636353	0.71899	-0.885064	0.376122	0.525021
AABR07059632.3	358.42	-0.0816401	0.21568	-0.378524	0.705041	0.805998
AABR07059663.1	1714.06	0.0700789	0.168232	0.41656	0.677	0.784751
AABR07059891.1	128.87	-0.0818646	0.258974	-0.316111	0.751918	0.839261
AABR07059925.1	2.25892	0	4.08046	0	1	NA
AABR07060165.1	1.26059	-0.250728	1.39672	-0.179511	0.857536	NA
AABR07060287.1	1.20439	-0.933763	1.9968	-0.467631	0.640049	NA
AABR07060293.1	1.36387	0.983001	1.90486	0.51605	0.605819	NA
AABR07060364.1	35.5278	0.0647251	0.520673	0.12431	0.90107	0.941197
AABR07060408.1	6.57962	1.47746	0.935797	1.57883	0.114376	0.216308
AABR07060610.1	1573.95	-0.00839407	0.382324	-0.0219554	0.982484	0.989955
AABR07060678.1	55.2472	-1.08375	0.653353	-1.65876	0.0971647	0.191452
AABR07060833.1	2.49794	-0.900747	1.1557	-0.779396	0.435746	NA
AABR07060872.1	122.906	-0.996332	0.291408	-3.41903	0.000628453	0.00353023
AABR07061001.1	0.940735	-2.58521	3.97077	-0.65106	0.515008	NA
AABR07061378.1	20.7189	-0.180655	3.73307	-0.0483931	0.961403	0.978439
AABR07061383.1	1506.64	-0.821045	0.957226	-0.857734	0.391039	0.538829
AABR07061614.3	3.73439	0.516907	1.67065	0.309404	0.757014	NA
AABR07061801.2	5.82528	-1.16884	0.976784	-1.19662	0.231456	0.368093
AABR07061825.1	1.8659	0.658483	1.24749	0.527847	0.597605	NA
AABR07061825.2	10.9856	0.55322	0.622503	0.888703	0.374163	0.522804
AABR07061834.1	1.47745	-0.83649	1.42332	-0.587703	0.556732	NA
AABR07061838.1	1.43451	-0.843611	1.3486	-0.625544	0.531614	NA
AABR07061902.1	179.758	0.280552	0.277154	1.01226	0.311414	0.457623
AABR07061964.1	1.09714	0.997989	1.71	0.583619	0.559477	NA
AABR07062138.2	10.0514	-0.272052	0.733008	-0.371144	0.71053	0.810127
AABR07062154.1	8.29436	0.766968	0.658401	1.1649	0.244061	0.382184
AABR07062185.1	2.32124	-1.96205	1.7845	-1.09949	0.271553	NA
AABR07062390.1	5.00741	-3.04139	3.7913	-0.802203	0.422436	0.570435
AABR07062390.2	76.639	-1.72326	1.3859	-1.24342	0.213712	0.346588
AABR07062466.1	1.20015	-3.47149	2.37398	-1.46231	0.143657	NA
AABR07062512.1	143.049	0.343504	0.230025	1.49333	0.13535	0.24561
AABR07062533.1	6.69793	0.35961	0.792117	0.453986	0.649839	0.763461
AABR07062570.1	332.025	0.0478534	0.295631	0.161869	0.871409	0.922852
AABR07062583.1	271.543	0.683983	0.135733	5.03917	4.68e-07	9.32e-06
AABR07062670.1	2.03868	0.501291	1.16209	0.431371	0.666199	NA
AABR07062694.2	39.5615	0.761177	0.732673	1.0389	0.298849	0.443866
AABR07062766.1	1.97461	1.74735	2.11046	0.827946	0.407701	NA
AABR07062799.2	12.6697	1.66567	0.683727	2.43616	0.0148439	0.0443043
AABR07062898.1	3.77351	-1.07611	0.933436	-1.15285	0.248972	NA
AABR07063082.1	66.8337	0.488356	0.415808	1.17448	0.240205	0.378319
AABR07063197.1	65.9765	-0.172177	0.415676	-0.414209	0.678721	0.786321
AABR07063248.1	6.4535	0.298431	0.866982	0.344218	0.730682	0.824645
AABR07063279.1	278.727	-0.257501	0.142725	-1.80417	0.0712042	0.151123
AABR07063281.1	448.609	0.265844	0.129159	2.05827	0.0395639	0.0952523
AABR07063282.1	6.49382	0.678487	0.634698	1.06899	0.285074	0.428717
AABR07063424.1	29.8447	0.136574	0.881585	0.154918	0.876886	0.92594
AABR07063425.3	4.34258	-0.255993	0.794353	-0.322266	0.747251	NA
AABR07063459.1	1.18655	1.75772	1.90544	0.922476	0.35628	NA
AABR07063703.1	4.96242	-0.0708884	0.821564	-0.0862847	0.93124	0.959246
AABR07063704.1	2.91422	-1.66579	1.64216	-1.01439	0.310396	NA
AABR07063829.1	37.1057	-0.253891	0.334889	-0.758135	0.44837	0.595321
AABR07063855.1	459.804	-0.0205839	0.168901	-0.12187	0.903002	0.942178
AABR07063893.1	725.312	-0.397735	0.261022	-1.52376	0.127569	0.234849
AABR07063959.1	1.31024	0.901553	1.84406	0.488895	0.624916	NA
AABR07064000.1	39.5289	0.0562523	0.405521	0.138716	0.889675	0.934205
AABR07064048.1	10.6785	-0.467036	0.642585	-0.726809	0.467343	0.611452
AABR07064061.1	1239.91	1.18153	0.14215	8.31189	9.42e-17	2e-14
AABR07064102.1	1.11362	-0.475675	1.84018	-0.258494	0.796025	NA
AABR07064111.1	41.3166	1.38855	0.334952	4.14551	3.39e-05	0.000328727
AABR07064253.1	27.5237	0.192279	0.445623	0.431484	0.666116	0.775587
AABR07064257.1	1029.77	0.533836	0.10638	5.01821	5.22e-07	1.02e-05
AABR07064349.1	10.5554	1.0023	0.572759	1.74995	0.0801268	0.16557
AABR07064502.1	5.348	5.65471	2.33503	2.42169	0.0154484	0.0456606
AABR07064503.1	4.60255	1.26227	2.35991	0.534881	0.592732	NA
AABR07064590.1	97.7703	-0.349895	0.419109	-0.834854	0.4038	0.552482
AABR07064622.1	18.7668	-22.2412	3.9081	-5.69105	NA	NA
AABR07064634.1	2.27386	5.45571	3.92059	1.39155	0.164058	NA
AABR07064702.1	2.14063	-0.38262	1.4007	-0.273164	0.784727	NA
AABR07064711.1	1.44654	-4.06309	2.32189	-1.74991	0.0801344	NA
AABR07064719.2	289.146	0.147488	0.154187	0.956552	0.338794	0.486537
AABR07064753.1	16.0428	2.1013	0.710703	2.95665	0.00311005	0.0126615
AABR07064804.1	232.395	0.879739	0.256987	3.42329	0.000618689	0.00348575
AABR07065031.1	2.83796	-0.365673	1.41948	-0.25761	0.796708	NA
AABR07065078.1	273.799	-0.784619	0.266955	-2.93915	0.00329115	0.0132497
AABR07065113.1	7.00643	0.23849	0.830169	0.287279	0.773899	0.854927
AABR07065139.1	1.30765	2.84333	1.88336	1.50971	0.131116	NA
AABR07065265.1	10.667	-0.916784	0.65597	-1.3976	0.162233	0.281346
AABR07065291.1	1.44456	1.00502	2.06365	0.487012	0.62625	NA
AABR07065406.1	596.986	-0.76296	0.119026	-6.41003	1.45e-10	8.28e-09
AABR07065420.1	72.5623	0.100863	0.277355	0.363661	0.716111	0.814522
AABR07065438.1	3634.44	-0.85822	0.131148	-6.54388	5.99e-11	3.85e-09
AABR07065485.1	104.355	0.0727815	1.4029	0.0518795	0.958625	0.976599
AABR07065498.1	98.763	1.37497	0.307077	4.47759	7.55e-06	9.58e-05
AABR07065598.1	5.62918	-0.831306	3.6342	-0.228745	0.819067	0.886763
AABR07065776.1	15.5641	-0.856602	0.434695	-1.97058	0.0487715	0.112198
AABR07065897.1	6.25849	0.58075	0.766579	0.757587	0.448698	0.595622
AABR07066144.1	69.3341	-1.38035	0.344835	-4.00293	6.26e-05	0.000546244
AABR07066180.1	1042.54	0.59568	0.208857	2.85209	0.00434328	0.0165086
AABR07066339.1	6.70714	-2.52613	1.30817	-1.93104	0.0534786	0.120584
AABR07066379.1	15.7009	-0.0152058	0.476012	-0.0319442	0.974517	0.985213
AABR07066510.1	42.4516	-0.383619	0.284597	-1.34794	0.177678	0.300777
AABR07066516.1	2.11647	0.971551	1.47659	0.657968	0.510559	NA
AABR07066522.1	737.164	-0.055111	0.14175	-0.38879	0.697432	0.800055
AABR07066529.1	88.2669	-0.584553	0.357643	-1.63446	0.102163	0.19853
AABR07066700.1	6.39989	0.944025	0.786223	1.20071	0.229864	0.366314
AABR07066753.1	1.08946	-1.72526	2.038	-0.846549	0.397247	NA
AABR07066792.1	5.46651	-2.79299	2.00131	-1.39558	0.162843	0.281918
AABR07066818.1	26.0253	-0.519985	1.0229	-0.508344	0.611212	0.734351
AABR07066826.1	15.5392	0.69154	0.612599	1.12886	0.258955	0.399379
AABR07066871.3	131.171	-0.112982	0.194903	-0.579682	0.562129	0.694265
AABR07066944.1	29.496	-0.458545	0.415399	-1.10387	0.269651	0.41163
AABR07067080.1	1.25865	0.910892	1.76683	0.515552	0.606168	NA
AABR07067082.1	12.1258	-1.44163	1.22471	-1.17712	0.239148	0.377148
AABR07067233.2	195.655	-0.203375	0.45876	-0.443316	0.657538	0.769513
AABR07067267.1	858.864	7.81609	1.24456	6.2802	3.38e-10	1.77e-08
AABR07067387.1	6.20786	-0.486751	0.745802	-0.652655	0.513979	0.653506
AABR07067388.1	1.3299	-0.186721	1.43424	-0.130188	0.896418	NA
AABR07067506.1	11.937	3.04823	2.7842	1.09483	0.27359	0.415753
AABR07067520.1	2.62768	0.0663346	1.12002	0.0592264	0.952772	NA
AABR07067762.1	3.85768	0.34154	0.899961	0.379505	0.704313	NA
AABR07067814.1	40.5243	-0.678841	0.501992	-1.35229	0.176282	0.299016
AABR07067829.1	1.34476	-0.900992	2.52868	-0.356309	0.721609	NA
AABR07067882.1	4.13452	0.819288	1.34758	0.607968	0.543209	NA
AABR07068018.2	68.2717	-0.484337	0.665162	-0.728149	0.466522	0.610855
AABR07068127.1	34.6865	-0.126511	0.310077	-0.407999	0.683275	0.7896
AABR07068161.1	449.07	0.0621196	0.270416	0.229718	0.818311	0.886444
AABR07068214.1	30.5032	0.531948	0.366206	1.45259	0.146337	0.260509
AABR07068221.1	6.73191	0.239946	0.925239	0.259334	0.795378	0.869781
AABR07068285.2	49.4877	-0.55931	0.35711	-1.56621	0.117299	0.220182
AABR07068327.2	8.80061	-0.271971	0.600153	-0.45317	0.650427	0.763736
AABR07068351.1	466.662	-0.312312	0.158849	-1.96609	0.0492883	0.113232
AABR07068536.1	6.21199	-0.615712	1.46224	-0.421074	0.673701	0.782007
AABR07068587.1	3.59785	-0.0614741	1.21632	-0.0505411	0.959691	NA
AABR07068674.1	3.1515	2.54704	1.36431	1.86691	0.0619138	NA
AABR07068694.1	3.42542	0.78549	1.03379	0.759819	0.447363	NA
AABR07068760.1	2.37444	-0.019277	1.39999	-0.0137694	0.989014	NA
AABR07068887.1	1.66334	-4.1289	1.86377	-2.21534	0.0267365	NA
AABR07069219.1	212.043	0.035307	0.240783	0.146634	0.883421	0.930159
AABR07069282.1	159.523	-1.59927	0.418353	-3.82278	0.000131954	0.00100818
AABR07069371.1	3.77387	-0.505138	1.9062	-0.264998	0.791011	NA
AABR07069466.1	8.79362	-0.566701	0.643387	-0.880808	0.378422	0.527312
AABR07069524.1	99.7403	0.279747	0.430391	0.649983	0.515703	0.654872
AABR07069587.1	1.24213	1.08855	1.82106	0.597756	0.550002	NA
AABR07069611.1	10.1264	0.900698	2.9069	0.309848	0.756677	0.842794
AABR07069969.1	7.28923	1.06821	0.724761	1.47388	0.140513	0.252492
AABR07070043.1	90.2896	-0.320171	0.4754	-0.673478	0.500643	0.641572
AABR07070046.1	7.93299	0.58935	0.686283	0.858756	0.390475	0.538331
AABR07070117.1	25.7901	0.15412	0.399505	0.385778	0.699661	0.801971
AABR07070225.1	19.662	-0.773951	0.899246	-0.860666	0.389422	0.537484
AABR07070238.1	2.22431	-0.537096	1.21712	-0.441283	0.659008	NA
AABR07070238.3	1.4133	0	4.08046	0	1	NA
AABR07070416.2	23.6976	-0.663376	0.55385	-1.19776	0.231012	0.367619
AABR07070456.1	8.56499	1.0343	1.19785	0.863464	0.387883	0.536016
AABR07070599.1	1.17759	1.03119	1.94751	0.52949	0.596465	NA
AABR07070796.1	6.12769	0.0472462	3.74433	0.0126181	0.989933	0.994145
AABR07070810.1	45.841	-0.648846	0.386339	-1.67947	0.0930601	0.185176
AABR07070892.1	1.22292	-1.00279	1.60136	-0.626215	0.531174	NA
AABR07070926.1	10.493	-1.3373	0.975425	-1.37099	0.170377	0.291208
AABR07070957.1	2.72973	-0.653522	1.07834	-0.606046	0.544484	NA
AABR07071000.1	160.744	0.646806	0.238737	2.70928	0.00674284	0.023582
AABR07071101.1	3.72903	-1.18841	1.17479	-1.01159	0.311733	NA
AABR07071195.1	2.28391	-0.611248	1.37449	-0.44471	0.656529	NA
AABR07071244.1	1365.83	0.212755	0.182272	1.16724	0.243114	0.381251
AABR07071482.2	2.13024	-2.3161	1.94202	-1.19262	0.233018	NA
AABR07071598.1	14.7944	-0.638778	0.470936	-1.3564	0.174972	0.297222
AABR07071731.1	1.11558	-0.583112	1.51849	-0.384008	0.700973	NA
AABR07071765.1	9.33963	0.515215	0.683885	0.753366	0.45123	0.59788
AABR07071838.1	12.3561	0.199264	0.693108	0.287494	0.773734	0.854927
AABR07071876.1	165.293	-0.304372	0.203451	-1.49605	0.134641	0.244677
AABR07071891.1	3694.7	-0.845672	0.211847	-3.99191	6.55e-05	0.000568659
AABR07071891.2	3.73613	0.834394	1.82471	0.457275	0.647473	NA
AABR07071898.1	53.427	0.370969	0.639935	0.579698	0.562118	0.694265
AABR07071905.1	2.22215	-1.12931	1.46501	-0.770854	0.440794	NA
AABR07071935.1	1.33771	-1.90013	1.60961	-1.18049	0.237805	NA
AABR07071966.1	3.29729	0.810617	0.939877	0.862471	0.388428	NA
AABR07071986.1	1.72504	-1.54885	1.88125	-0.823309	0.410332	NA
AABR07072078.1	1250.49	-0.478755	0.1519	-3.15177	0.00162283	0.00751236
AABR07072096.1	4.86315	0.387913	0.906577	0.427888	0.668733	0.777734
AABR07072108.1	47.222	-0.204089	0.256706	-0.795028	0.426597	0.574054
AABR07072181.2	1.03606	-0.910062	2.14978	-0.423328	0.672056	NA
AABR07072184.1	349.118	0.259887	0.207082	1.255	0.20948	0.341452
AABR07072207.1	1.50654	-0.727648	1.90263	-0.382444	0.702132	NA
AABR07072260.1	3.2524	-0.67933	1.26339	-0.537706	0.59078	NA
AABR07072261.1	2.13514	-2.05627	2.0498	-1.00316	0.315785	NA
AABR07072272.1	3.42009	0.111184	1.05335	0.105552	0.915938	NA
AABR07072356.1	453.374	-0.422918	0.210787	-2.00638	0.0448159	0.104904
AABR07072362.1	13.6622	0.0225836	0.891506	0.025332	0.97979	0.98896
AABR07072400.1	2.06554	-0.631748	1.89156	-0.333982	0.738393	NA
AABR07072400.2	0.927068	-3.83794	3.93377	-0.97564	0.329243	NA
AABR07072440.1	2.63368	-1.58243	1.65342	-0.957066	0.338534	NA
AABR07072539.4	5.53648	-0.194601	0.836354	-0.232678	0.816012	0.884822
AABR07072546.1	33.344	2.60507	0.727321	3.58174	0.000341316	0.00215174
AABR07072562.1	4.29736	-0.728104	0.997807	-0.729704	0.465571	NA
AABR07072593.1	39.0179	0.720411	0.524621	1.3732	0.169689	0.290311
AABR07072639.2	13.4834	1.14663	0.669929	1.71157	0.0869757	0.176316
AABR07072671.2	30.2863	-0.597082	0.462725	-1.29036	0.196925	0.325337
AABR07072761.1	2.82612	1.2455	1.25224	0.994611	0.319926	NA
AABR07073038.1	3135.88	-0.172336	0.182303	-0.945329	0.344491	0.492267
AABR07073039.1	2.20625	0.19651	1.10863	0.177255	0.859308	NA
AABR07073045.1	3498.14	-0.761667	0.182198	-4.18043	2.91e-05	0.000289532
AABR07073134.1	22.0754	-0.0891159	0.416608	-0.213908	0.830619	0.89478
AABR07073181.1	3462.1	1.10113	0.290233	3.79396	0.000148263	0.00110429
Aacs	183.656	-1.14661	0.252815	-4.53536	5.75e-06	7.59e-05
Aadat	22.2708	0.956703	0.577668	1.65615	0.0976922	0.192284
Aagab	284.582	0.316826	0.203754	1.55494	0.119959	0.223994
Aak1	284.253	1.13469	0.13945	8.13688	4.06e-16	7.38e-14
Aamdc	220.786	0.704909	0.391641	1.79989	0.0718783	0.152211
Aamp	2403.6	0.083892	0.0958346	0.875383	0.381366	0.530045
Aar2	509.772	-0.398513	0.138306	-2.88138	0.00395933	0.0153152
Aard	35.2187	-0.0465469	0.560526	-0.0830414	0.933819	0.960723
Aars	2425.71	-0.386499	0.168583	-2.29263	0.0218692	0.060039
Aars2	543.649	0.0176049	0.16262	0.108258	0.913791	0.949269
Aarsd1	930.298	-0.441741	0.0920909	-4.79679	1.61e-06	2.65e-05
Aasdh	211.176	-0.0974743	0.266505	-0.365751	0.714551	0.813426
Aasdhppt	724.987	0.0376105	0.121804	0.308779	0.75749	0.842989
Aass	11.116	-0.19614	0.546262	-0.359059	0.719551	0.816714
Aatf	322.945	-0.394852	0.234761	-1.68193	0.0925818	0.184455
Aatk	162.668	0.436959	0.22176	1.97042	0.0487908	0.112226
Abat	2.9009	1.70756	1.22912	1.38925	0.164755	NA
Abca1	780.519	0.367637	0.263207	1.39676	0.162486	0.281625
Abca16	13.6267	0.034699	0.526691	0.065881	0.947473	0.969012
Abca17	17.3554	0.356993	0.66828	0.534197	0.593205	0.719651
Abca2	950.54	0.199529	0.12552	1.58961	0.111922	0.212541
Abca3	684.869	0.105585	0.172981	0.610385	0.541607	0.677233
Abca4	36.6756	-0.850309	0.33984	-2.50209	0.0123463	0.038231
Abca5	93.3432	0.64796	0.343997	1.88362	0.0596162	0.131077
Abca7	459.056	-0.359237	0.157125	-2.28632	0.0222354	0.0607243
Abca8	67.5694	1.62874	0.466166	3.49389	0.000476033	0.00282422
Abca8a	1703.59	1.60518	0.368643	4.35431	1.33e-05	0.000152291
Abca9	132.911	0.949832	0.276161	3.43941	0.000582977	0.00332799
Abcb10	480.326	0.427922	0.138871	3.08144	0.00206004	0.00909054
Abcb11	1.43598	0.442376	1.51041	0.292884	0.76961	NA
Abcb4	883.085	0.172403	0.0985056	1.75018	0.0800869	0.165533
Abcb6	995.286	-0.135689	0.229652	-0.590843	0.554626	0.688135
Abcb7	333.802	0.868308	0.175368	4.95134	7.37e-07	1.36e-05
Abcb8	1051.34	0.264581	0.104452	2.53304	0.0113077	0.0356881
Abcb9	162.618	0.964109	0.330999	2.91272	0.00358294	0.0141872
Abcc1	461.429	0.580328	0.255513	2.27122	0.0231336	0.0626001
Abcc10	126.212	-0.147578	0.208245	-0.708679	0.478524	0.621672
Abcc2	26.5098	-0.324378	0.352427	-0.920413	0.357357	0.505846
Abcc3	243.693	0.10943	0.251199	0.435629	0.663106	0.773573
Abcc4	343.834	0.718534	0.177345	4.0516	5.09e-05	0.000462587
Abcc5	1472.72	-0.122951	0.110827	-1.10939	0.267263	0.40881
Abcc8	336.888	1.57144	0.483066	3.25306	0.00114171	0.00564318
Abcc9	4798.54	1.12482	0.1598	7.03888	1.94e-12	1.82e-10
Abcd1	826.21	0.327871	0.112234	2.92131	0.0034856	0.0138662
Abcd2	54.815	-0.152122	0.409676	-0.371322	0.710398	0.810037
Abcd3	1308.27	0.498358	0.173803	2.86738	0.0041389	0.0158796
Abcd4	153.419	-0.672092	0.196248	-3.42472	0.000615445	0.00347366
Abce1	2398.21	-0.33196	0.205043	-1.61898	0.105452	0.203377
Abcf1	3860.18	0.131619	0.180392	0.729631	0.465616	0.610091
Abcf2	1468.95	-0.0844078	0.101228	-0.833835	0.404374	0.553117
Abcf3	1455.1	0.120034	0.115336	1.04073	0.298001	0.442911
Abcg1	509.543	0.219217	0.236001	0.92888	0.352951	0.501018
Abcg2	50.408	0.193064	0.314048	0.61476	0.538713	0.675112
Abcg3l1	213.603	-0.117497	0.245998	-0.477634	0.632911	0.751581
Abcg3l3	232.102	0.258841	0.182475	1.4185	0.156045	0.273726
Abcg4	13.6358	-0.130615	0.745802	-0.175133	0.860975	0.91546
Abcg5	1.76778	0.398982	1.84856	0.215834	0.829117	NA
Abcg8	1.17627	2.23775	1.93316	1.15756	0.247044	NA
Abhd1	311.582	-0.0546503	0.153603	-0.35579	0.721998	0.818199
Abhd10	99.5639	0.360756	0.283831	1.27102	0.20372	0.333896
Abhd11	420.803	-0.159905	0.142482	-1.12228	0.261742	0.402731
Abhd12	1084.98	-0.580591	0.244682	-2.37284	0.0176521	0.0507973
Abhd13	462.076	-0.0252027	0.149482	-0.1686	0.866111	0.919174
Abhd14a	124.819	0.580196	0.284878	2.03665	0.0416854	0.0992524
Abhd14b	310.435	0.365778	0.181399	2.01642	0.0437561	0.10311
Abhd15	68.9782	-0.0264132	0.270155	-0.0977706	0.922114	0.953683
Abhd16a	1292.26	-0.194042	0.121601	-1.59573	0.110549	0.210414
Abhd17a	1410.06	-0.36235	0.0998204	-3.63002	0.000283402	0.00185637
Abhd17b	462.185	-0.315265	0.122429	-2.57509	0.0100215	0.0323589
Abhd17c	497.898	0.0017393	0.12213	0.0142413	0.988637	0.993394
Abhd18	655.574	1.51459	0.340286	4.45094	8.55e-06	0.000105939
Abhd2	361.589	-0.0754542	0.294261	-0.25642	0.797627	0.87135
Abhd3	25.492	-0.547187	0.369643	-1.48031	0.138791	0.250231
Abhd4	1199.11	0.212972	0.129721	1.64177	0.100638	0.196476
Abhd5	779.968	0.0473052	0.0865953	0.546279	0.584874	0.713021
Abhd6	319.329	0.328074	0.123688	2.65242	0.00799172	0.0269153
Abhd8	391.811	-0.73718	0.173363	-4.25224	2.12e-05	0.000221546
Abi1	1365.86	-0.109059	0.142402	-0.765853	0.443764	0.591021
Abi2	256.28	0.415926	0.190091	2.18803	0.0286672	0.0741013
Abi3	452.041	-0.166094	0.173644	-0.956522	0.338808	0.486537
Abi3bp	287.999	1.24334	0.252058	4.93274	8.11e-07	1.48e-05
Abitram	45.4208	-0.128175	0.282952	-0.45299	0.650556	0.763736
Abl1	135.305	3.97699	1.65171	2.4078	0.0160492	0.0470267
Abl2	112.205	0.617093	0.377092	1.63645	0.101745	0.197819
Ablim2	239.581	1.83721	0.3702	4.96275	6.95e-07	1.3e-05
Ablim3	909.173	0.598477	0.135921	4.40313	1.07e-05	0.00012661
Abo	104.722	0.101444	0.241666	0.419769	0.674654	0.782692
Abr	568.585	0.232094	0.307407	0.755006	0.450245	0.596889
Abra	285.317	1.24078	0.407667	3.04361	0.00233759	0.0100168
Abracl	887.118	-0.97244	0.144469	-6.73113	1.68e-11	1.27e-09
Abraxas1	123.194	-0.559498	0.250199	-2.23621	0.0253379	0.067299
Abraxas2	659.389	0.0750428	0.095995	0.781736	0.43437	0.581457
Abt1	247.999	-0.536208	0.159026	-3.37182	0.000746731	0.00404134
Abtb1	437.053	0.365429	0.208467	1.75293	0.0796142	0.164736
Abtb2	282.954	1.10925	0.176545	6.28308	3.32e-10	1.74e-08
AC080157.1	81.5494	-0.931948	0.466801	-1.99646	0.0458841	0.106808
AC093965.1	21.064	-0.231678	0.454385	-0.509871	0.610142	0.733306
AC094055.1	12.2641	1.20984	0.567174	2.13311	0.032916	0.0825301
AC094212.1	1050.43	0.862174	0.177401	4.86004	1.17e-06	2.03e-05
AC094217.1	1617.66	-0.470516	0.314796	-1.49467	0.135	0.245241
AC094221.4	24.4707	0.528614	0.697264	0.758126	0.448375	0.595321
AC094246.1	8.041	0.210581	1.42524	0.147751	0.882539	0.929685
AC094246.2	5.09322	1.61352	1.28769	1.25303	0.210194	0.342255
AC094348.3	97.7622	0.819381	0.28352	2.89003	0.00385211	0.015043
AC094348.6	3.64144	1.2236	1.08365	1.12915	0.258835	NA
AC094643.2	693.498	-0.0807363	0.182369	-0.442708	0.657977	0.769849
AC094647.2	8.23451	-0.449632	0.603991	-0.744435	0.456614	0.60225
AC095693.1	1.29091	-1.26648	1.63462	-0.774786	0.438466	NA
AC095947.1	433.197	-0.335456	0.21919	-1.53044	0.125909	0.232642
AC096030.1	2.81843	0.324662	1.18953	0.272934	0.784904	NA
AC096201.1	11.2655	0.578968	0.605394	0.956349	0.338896	0.486537
AC096239.2	54.6063	-1.02176	0.255556	-3.9982	6.38e-05	0.000555992
AC096353.1	1.72901	-1.11743	1.47463	-0.757771	0.448588	NA
AC096601.1	39.5029	1.08119	0.426866	2.53285	0.011314	0.0357004
AC096792.1	12.4486	0.804581	0.828522	0.971104	0.331497	0.47866
AC096809.1	44.2688	1.50111	0.382422	3.92526	8.66e-05	0.000710389
AC097037.1	1.00796	-0.999964	2.14631	-0.465899	0.641287	NA
AC097037.2	2.26754	0.293407	1.36882	0.214351	0.830273	NA
AC097153.2	1.962	-1.05931	1.60119	-0.661577	0.508242	NA
AC097183.1	3.35769	-1.29421	1.14221	-1.13308	0.25718	NA
AC097784.1	216.448	-0.0202483	0.171829	-0.11784	0.906194	0.943939
AC098008.1	3.88725	0.556965	0.92015	0.605298	0.544981	NA
AC098008.3	2.08932	1.48934	1.39455	1.06798	0.285531	NA
AC098008.5	35.9052	-0.592219	0.416461	-1.42203	0.155019	0.272242
AC098125.3	4.1871	0.729284	0.962415	0.757765	0.448592	NA
AC098180.1	3.26044	-0.714938	1.21349	-0.58916	0.555754	NA
AC098459.1	319.062	0.372774	0.183364	2.03298	0.042055	0.0999435
AC098459.2	67.3382	-1.2472	0.561942	-2.21945	0.0264559	0.0696925
AC098547.2	16.3266	1.47382	1.13751	1.29566	0.195093	0.322875
AC098563.1	12.2635	-0.821585	0.78471	-1.04699	0.295103	0.439946
AC098750.1	5.99252	-2.22563	1.85619	-1.19903	0.230516	0.367154
AC099137.1	9.0137	-0.0279102	0.618759	-0.0451068	0.964022	0.979602
AC099304.1	4.24937	-0.475217	0.781384	-0.608173	0.543073	NA
AC099384.2	23.0091	0.457207	0.459443	0.995133	0.319671	0.466625
AC099444.1	2.46432	0.726602	1.37423	0.528733	0.59699	NA
AC099453.1	1067.57	-0.657339	0.123323	-5.33021	9.81e-08	2.49e-06
AC102976.1	247.124	-0.394177	0.209492	-1.88158	0.059893	0.131533
AC103024.1	2.61944	-1.22433	1.33383	-0.917904	0.358669	NA
AC103024.2	22.0416	0.423231	0.529515	0.799281	0.424127	0.572208
AC103056.1	8.28524	-0.725956	0.712233	-1.01927	0.308076	0.453865
AC103101.1	3.59606	0.249393	0.919855	0.271123	0.786297	NA
AC103179.1	1.9613	1.48701	1.76439	0.842786	0.399348	NA
AC103179.2	2.86064	2.56149	1.58911	1.6119	0.106984	NA
AC103221.1	144.615	0.118993	0.178242	0.667592	0.504394	0.644738
AC103535.1	17.3259	-0.0161988	0.481846	-0.0336182	0.973182	0.984391
AC104053.1	133.363	0.662211	0.454401	1.45733	0.145026	0.258938
AC105531.1	581.288	0.444239	0.168301	2.63955	0.00830152	0.0277927
AC105577.1	23.658	-1.07418	3.73544	-0.287565	NA	NA
AC105662.1	2.20534	-2.20442	1.53598	-1.43519	0.151233	NA
AC105662.2	10.6466	0.402634	0.63446	0.634609	0.525683	0.663824
AC105662.3	4.37628	-0.850988	0.867451	-0.981021	0.326582	NA
AC105804.1	3.67775	-0.0949696	1.69954	-0.0558794	0.955438	NA
AC106292.2	474.174	0.497812	0.250577	1.98666	0.0469596	0.108775
AC106605.1	7.87791	1.03585	0.814324	1.27204	0.20336	0.333487
AC106932.1	1.50053	-2.12347	1.53504	-1.38334	0.166561	NA
AC107331.2	47.1659	0.786528	0.562188	1.39905	0.161799	0.280787
AC107446.2	5.24545	0.889431	0.876647	1.01458	0.310305	0.456304
AC107446.3	43.5026	-0.0461635	2.16363	-0.0213361	0.982978	0.990254
AC107531.3	301.662	-0.00898861	0.186728	-0.0481375	0.961607	0.978441
AC108288.1	43.8436	-0.0614847	0.270227	-0.22753	0.820012	0.887142
AC108588.1	162.087	-0.1988	0.252562	-0.787134	0.431203	0.578448
AC108595.1	144.764	-1.03772	0.289816	-3.58062	0.000342783	0.00215739
AC109048.1	250.915	-0.297623	0.158139	-1.88203	0.0598313	0.131436
AC109096.1	109.539	-0.741344	0.201607	-3.67717	0.00023584	0.00160611
AC109737.1	35.9153	1.11836	0.707051	1.58172	0.113713	0.215269
AC109837.1	21.7688	-0.356932	0.941234	-0.379217	0.704526	0.80562
AC109844.1	1.74137	1.59982	1.59319	1.00416	0.315303	NA
AC109942.1	59.8863	0.822256	0.290721	2.82833	0.00467912	0.0175424
AC109942.2	2.07329	-1.42262	1.52213	-0.934625	0.349982	NA
AC109958.1	920.365	0.331694	0.117144	2.8315	0.00463308	0.0174
AC110351.1	5.15852	-1.62733	0.894494	-1.81927	0.0688703	0.147162
AC110709.1	6.02886	-0.688226	1.00622	-0.68397	0.493994	0.635802
AC110824.1	10.885	0.792841	0.819997	0.966883	0.333602	0.48101
AC110981.1	5.19662	-0.289498	0.907406	-0.319039	0.749697	0.837769
AC111319.3	9.3746	0.313304	0.671185	0.466792	0.640649	0.756784
AC111575.1	1.50954	1.48167	1.75745	0.843081	0.399183	NA
AC111632.2	198.591	0.241686	0.279063	0.866061	0.386457	0.534701
AC111831.2	6.54089	-0.323261	0.78503	-0.411782	0.680499	0.787417
AC111885.1	363.339	0.397132	0.161834	2.45394	0.01413	0.0425591
AC112001.1	7.0282	0	4.08046	0	1	1
AC112355.1	88.4425	-0.0964621	0.410099	-0.235217	0.81404	0.883403
AC112531.1	1.74476	0.70452	1.42255	0.495252	0.620422	NA
AC112568.1	1.52835	0.378871	1.7649	0.21467	0.830025	NA
AC112568.3	22.0366	-1.04662	0.655486	-1.5967	0.110332	0.210187
AC112624.1	477.452	-0.222632	0.232086	-0.959266	0.337425	0.485179
AC113773.2	4.07959	-2.26674	1.39018	-1.63053	0.10299	NA
AC113785.2	8.01216	-1.16434	0.763592	-1.52482	0.127304	0.234476
AC113837.1	4.35674	-2.92221	1.51594	-1.92765	0.0538982	NA
AC113910.1	5.71132	-0.0650947	1.30167	-0.0500084	0.960116	0.977458
AC114233.2	42.3182	-0.000332724	0.56021	-0.000593927	0.999526	1
AC114363.1	1.91461	-0.113251	1.32487	-0.0854803	0.93188	NA
AC114389.1	3.00388	-0.52206	1.02193	-0.510855	0.609453	NA
AC114393.1	9.00491	0.172081	0.556534	0.309201	0.757169	0.842942
AC114446.1	5.17331	-1.67845	1.07219	-1.56544	0.11748	0.220412
AC114460.1	44.3603	0.476965	0.30274	1.57549	0.115142	0.217349
AC114845.2	33.3632	-0.178415	0.525058	-0.339801	0.734006	0.82703
AC115181.1	46.5673	-0.139694	0.325324	-0.4294	0.667632	0.776829
AC115277.1	3.3352	-3.34926	1.45335	-2.3045	0.0211943	NA
AC115371.1	2773.91	-0.603042	0.876021	-0.688387	0.491209	0.632757
AC115384.1	7.28923	1.06821	0.724761	1.47388	0.140513	0.252492
AC115420.2	48.2633	-0.246892	0.257137	-0.960155	0.336977	0.48472
AC115420.4	4.41237	1.1301	1.1608	0.973555	0.330278	NA
AC115509.1	2.71896	-2.03749	1.91563	-1.06361	0.287504	NA
AC115666.1	33.498	-1.16171	0.482753	-2.40642	0.0161096	0.0471764
AC117058.1	172.855	-0.810566	0.245082	-3.30732	0.000941921	0.00485762
AC117101.1	4.14105	-3.19878	1.38889	-2.30313	0.0212715	NA
AC117330.1	28.0046	0.425119	0.49795	0.85374	0.393249	0.540937
AC117869.1	70.2732	-0.485088	0.475194	-1.02082	0.30734	0.453091
AC117889.1	63.8606	-0.409643	0.328646	-1.24646	0.212596	0.345301
AC117925.2	12.2779	-1.8167	0.876288	-2.07318	0.038156	0.092675
AC118165.1	57.0147	-0.172167	0.266778	-0.645358	0.518695	0.657731
AC118414.1	22.0177	-3.47186	2.05538	-1.68916	0.0911884	0.182341
AC118490.1	4.60283	0.793959	1.18731	0.668705	0.503684	NA
AC118772.1	3.46167	0.652322	1.19274	0.546911	0.58444	NA
AC118772.2	18.3268	0.21778	0.810647	0.268649	0.7882	0.864737
AC119015.1	62.4573	-0.0935226	0.235634	-0.396898	0.691443	0.795638
AC119015.4	44.8475	0.539001	0.381609	1.41244	0.157819	0.275956
AC119332.1	1.04355	-0.722393	1.72781	-0.418098	0.675875	NA
AC119603.1	4.14945	0.286006	0.900739	0.317524	0.750846	NA
AC119762.4	13.5425	-0.220593	0.583848	-0.377827	0.705559	0.806224
AC119762.6	41.4281	-0.356192	0.393544	-0.90509	0.365418	0.513837
AC120246.2	1.37827	0.387461	2.57646	0.150385	0.880461	NA
AC120291.4	19.2962	-0.828665	0.57038	-1.45283	0.146271	0.260432
AC120310.1	5.53648	-0.194601	0.836354	-0.232678	0.816012	0.884822
AC120448.1	2.86208	-1.21578	1.05754	-1.14964	0.250293	NA
AC120486.3	6.23742	0.681287	0.694002	0.981679	0.326258	0.473312
AC120568.1	1.08911	-0.656472	1.72737	-0.380042	0.703914	NA
AC120712.2	12.9087	-0.268041	0.709181	-0.377958	0.705461	0.806202
AC120712.3	15.2456	-0.0302053	1.34089	-0.0225264	0.982028	0.989628
AC121031.1	27.633	-0.56603	0.469895	-1.20459	0.228362	0.364477
AC121415.1	7.04659	-0.339119	0.685556	-0.494662	0.620839	0.741971
AC121639.1	11.9385	-0.36033	0.764671	-0.471222	0.637482	0.754628
AC122603.1	4.4584	-0.56642	1.20534	-0.469926	0.638408	NA
AC122603.2	50.7819	-1.53326	0.403718	-3.79786	0.00014595	0.0010903
AC123138.1	1.16468	1.0466	1.62002	0.646039	0.518254	NA
AC123251.1	30.208	-0.225321	0.388091	-0.580588	0.561518	0.694029
AC123253.2	75.6896	0.995991	0.581598	1.71251	0.0868032	0.176066
AC123293.2	94.3649	0.188096	0.320149	0.587526	0.55685	0.689897
AC123346.1	17.0307	0.434659	0.45623	0.952721	0.340732	0.488399
AC123427.1	46.3747	-0.80778	0.402198	-2.00841	0.0445993	0.10463
AC123471.1	1.27198	-1.81999	1.79815	-1.01215	0.311468	NA
AC123494.1	36.1041	0.202528	0.343609	0.589413	0.555584	0.688844
AC124874.1	30.4177	0.226493	0.915708	0.247342	0.804643	0.876479
AC124874.2	251.016	0.0806356	0.297452	0.271088	0.786324	0.863558
AC124874.3	9.53559	-0.0392819	0.635267	-0.0618353	0.950694	0.971139
AC124926.2	231.378	-0.193159	0.258987	-0.745824	0.455774	0.601736
AC125920.1	25.8189	0.0494549	0.528987	0.09349	0.925514	0.95589
AC125982.1	13.0936	0.104207	0.5165	0.201757	0.840107	0.900945
AC126148.1	23.9018	-0.875961	0.399115	-2.19476	0.0281808	0.0731896
AC126292.2	22.5179	-0.831531	0.486688	-1.70855	0.0875343	0.177097
AC126482.2	1109.69	-1.03307	0.223113	-4.63026	3.65e-06	5.18e-05
AC126486.3	1.92525	-0.187851	1.71114	-0.109782	0.912583	NA
AC126530.2	1103.54	0.101805	0.215049	0.473404	0.635925	0.753384
AC126572.1	74.5804	0.513882	0.229366	2.24044	0.0250624	0.0667542
AC126572.2	31.9056	0.359698	0.331805	1.08406	0.278337	0.421144
AC126581.1	8.72932	-0.444373	0.601167	-0.739184	0.459795	0.60472
AC126897.1	0.993991	-3.73805	2.8712	-1.30191	0.192946	NA
AC127076.1	23.7667	-0.75722	0.427661	-1.77061	0.0766258	0.159756
AC127084.1	6.42193	0.697211	1.04503	0.667169	0.504664	0.644974
AC127640.1	73.0053	0.621746	0.301809	2.06006	0.0393925	0.0950061
AC127784.5	126.084	-2.76624	1.52408	-1.81503	0.0695198	0.148277
AC127920.1	61.6937	1.29883	0.567175	2.29	0.0220212	0.0603469
AC128084.1	1.42137	-1.33971	2.56954	-0.521382	0.602101	NA
AC128084.2	2.79403	0.952555	1.14943	0.828722	0.407262	NA
AC128207.1	26.7617	-0.351649	0.355096	-0.990292	0.322031	0.468982
AC128207.2	1.36592	0.461843	1.49255	0.309431	0.756994	NA
AC128212.1	65.6144	0.280245	0.306144	0.915401	0.359981	0.508369
AC128290.1	1.96742	-2.75009	1.96481	-1.39967	0.161612	NA
AC128353.1	58.4026	-0.0908685	1.30968	-0.0693824	0.944685	0.96775
AC128394.1	1.4133	0	4.08046	0	1	NA
AC128582.1	1.38967	-3.19353	1.8557	-1.72093	0.0852636	NA
AC128848.1	1.43423	-2.2814	1.87382	-1.21751	0.223409	NA
AC128859.1	15.4667	0.569918	0.520968	1.09396	0.273972	0.416208
AC128859.3	63.499	-0.531892	0.244811	-2.17266	0.0298058	0.0764504
AC128859.4	21.185	0.269715	0.398571	0.676704	0.498594	0.639706
AC128901.1	8.62367	0.232886	0.695692	0.334755	0.73781	0.829862
AC128960.1	2300.79	-0.648329	0.141682	-4.57595	4.74e-06	6.47e-05
AC128960.2	2.32947	0.561955	1.12151	0.501069	0.616322	NA
AC128960.3	1.32932	-2.06026	1.78869	-1.15183	0.249391	NA
AC128967.1	138.241	-0.23612	0.581203	-0.406261	0.684551	0.790531
AC129049.1	23.7757	-1.17464	0.550707	-2.13297	0.0329272	0.0825301
AC129054.2	11.3735	-0.0406192	0.646349	-0.0628441	0.949891	0.970712
AC129365.1	56.2857	-0.498173	0.375777	-1.32571	0.184935	0.310106
AC130035.1	2.71756	0.950335	1.45075	0.655067	0.512425	NA
AC130146.1	31.2358	2.37521	0.678333	3.50154	0.000462578	0.00276285
AC130162.1	353.891	-0.121515	0.227664	-0.533748	0.593516	0.719911
AC130232.1	25.0113	0.0227152	0.431852	0.0525994	0.958051	0.976212
AC130232.2	80.5701	0.363472	0.246532	1.47434	0.14039	0.252361
AC130391.3	370.077	0.90047	0.258138	3.48833	0.000486042	0.0028757
AC130940.1	250.977	0.570417	0.574322	0.993201	0.320612	0.467501
AC130970.1	23.0512	0.188619	0.505888	0.372846	0.709263	0.809293
AC131360.1	31.1238	0.237735	0.411692	0.577458	0.56363	0.695391
AC131360.2	16.0669	0.0847433	0.525818	0.161165	0.871964	0.923245
AC131806.3	11.3516	0.43417	0.602225	0.720943	0.470944	0.614407
AC132539.2	4.74702	-0.738373	0.802238	-0.920392	0.357368	NA
AC132740.1	335.844	-0.347417	0.245993	-1.41231	0.15786	0.275956
AC132752.1	17.679	-0.0576842	0.505089	-0.114206	0.909074	0.945831
AC132752.2	13.2845	0.702363	0.579638	1.21173	0.225617	0.361011
AC133265.2	7.094	0.504792	0.803065	0.628581	0.529623	0.667128
AC133403.1	970.235	0.240713	0.233915	1.02906	0.30345	0.448757
AC133673.1	1.23756	-0.0608168	1.87176	-0.0324918	0.97408	NA
AC134204.1	19.5216	1.53748	0.450971	3.40927	0.000651373	0.00362127
AC135026.1	1.95567	-0.0625134	1.57295	-0.0397428	0.968298	NA
AC136010.1	1.31148	-0.364753	1.86155	-0.19594	0.844657	NA
AC136584.1	1.85426	-2.64456	1.57066	-1.68373	0.0922347	NA
AC136588.1	2.02331	-1.32435	1.62939	-0.812792	0.416337	NA
AC136588.3	12.5004	-0.100417	0.534985	-0.1877	0.851112	0.909197
AC136661.1	6.57986	-2.49248	0.866468	-2.87659	0.00401992	0.0155207
AC139391.1	1.13642	2.16789	1.94965	1.11194	0.266166	NA
AC139445.2	2.7751	-0.843402	1.87789	-0.449122	0.653344	NA
AC141102.1	466.938	-0.472004	0.201282	-2.34498	0.019028	0.0538538
AC141220.4	2.95747	-2.63554	1.76661	-1.49187	0.135733	NA
AC141344.2	1.84386	0.490343	3.64119	0.134666	0.892876	NA
AC141489.1	3830.48	-0.619274	0.175923	-3.52014	0.000431311	0.00260911
AC141517.1	31.5933	-0.0505598	0.516303	-0.0979266	0.921991	0.95362
AC141959.1	479.293	0.00768222	0.20924	0.036715	0.970712	0.98321
AC142154.1	1.14104	0.953964	3.83467	0.248774	0.803536	NA
AC142180.1	10.7979	-1.4068	0.67162	-2.09463	0.0362039	0.0889638
AC142181.1	39.7208	1.17749	0.780432	1.50877	0.131359	0.240331
AC142421.1	0.973288	-2.54867	1.94574	-1.30988	0.190238	NA
AC142458.1	1.58393	1.52642	1.36668	1.11688	0.264047	NA
Ac1576	81.2709	0.235699	0.254299	0.926856	0.354001	0.502178
AC229945.1	93.9617	0.414185	0.364453	1.13646	0.255766	0.395754
AC239701.1	79.0563	0.360468	0.292452	1.23257	0.217736	0.351378
AC240408.1	18.6606	-1.04837	0.519547	-2.01786	0.0436059	0.10282
AC240408.2	31.9465	-0.469563	0.344373	-1.36353	0.172716	0.294157
AC241808.1	1.64598	-2.82116	1.74278	-1.61877	0.105497	NA
AC241859.1	26.1006	-0.134871	1.03411	-0.130423	0.896232	0.938729
AC242859.3	3.44158	-1.29456	1.0672	-1.21304	0.225116	NA
AC242863.1	46.6787	0.492803	0.615993	0.800015	0.423702	0.571788
AC242953.1	60.8075	0.308072	0.279559	1.10199	0.270466	0.41254
AC243566.1	27.1778	0.550011	1.0758	0.511255	0.609172	0.732374
AC244225.1	46.4923	-0.899184	0.411229	-2.18658	0.0287733	0.0742816
AC244815.1	14.6616	-1.00801	0.96613	-1.04335	0.296785	0.441843
Acaa1a	360.525	0.00112467	0.152227	0.00738814	0.994105	0.996811
Acaa2	10853.6	1.49944	0.326494	4.59255	4.38e-06	6.05e-05
Acaca	397.791	0.344035	0.276996	1.24202	0.214228	0.34709
Acacb	3885.55	1.93482	0.475202	4.07157	4.67e-05	0.000430616
Acad10	1206.39	1.56317	0.354775	4.40609	1.05e-05	0.000125106
Acad11	429.605	0.934033	0.159852	5.8431	5.12e-09	1.95e-07
Acad8	378.453	0.932429	0.255151	3.65443	0.000257759	0.00172277
Acad9	1590.64	0.538717	0.174328	3.09024	0.00199993	0.00886932
Acadl	19696.7	1.51948	0.38498	3.94691	7.92e-05	0.000664838
Acadm	15204.1	1.56513	0.38727	4.04144	5.31e-05	0.000479235
Acads	5209.89	1.22641	0.366759	3.34392	0.000826026	0.00438101
Acadsb	488.313	1.67776	0.192637	8.70944	3.05e-18	8.39e-16
Acadvl	8948.73	1.23115	0.316211	3.89345	9.88e-05	0.000797874
Acan	4.51701	-0.642147	0.879417	-0.730196	0.46527	NA
Acap1	241.865	-0.572872	0.255154	-2.2452	0.0247554	0.0660653
Acap2	603.578	0.29754	0.288489	1.03137	0.302366	0.447681
Acap3	506.732	-0.236128	0.143922	-1.64066	0.100867	0.196666
Acat1	7890.63	1.2763	0.345076	3.69861	0.000216787	0.00150497
Acat2	200.03	-0.969329	0.318091	-3.04733	0.00230882	0.00991887
Acat2l1	199.476	-0.878489	0.207354	-4.23665	2.27e-05	0.000234244
Acbd3	1513.6	-0.235342	0.114837	-2.04935	0.0404279	0.0969461
Acbd4	479.574	0.610727	0.181733	3.36056	0.000777836	0.00419016
Acbd5	597.569	0.670156	0.0942992	7.1067	1.19e-12	1.16e-10
Acbd6	553.246	-0.209191	0.129828	-1.6113	0.107115	0.205823
Accs	131.654	0.140075	0.198832	0.704492	0.481127	0.624027
Accsl	2.73886	-0.414039	1.14405	-0.361907	0.717421	NA
Acd	259.185	-0.434966	0.138944	-3.13052	0.00174496	0.007956
Ace	698.898	0.579	0.220609	2.62455	0.00867624	0.0287906
Ace2	115.02	0.174096	0.234906	0.741129	0.458615	0.60401
Acer2	992.585	-0.0262067	0.244224	-0.107306	0.914546	0.949823
Acer3	455.414	-0.364001	0.112835	-3.22596	0.0012555	0.00610964
Ache	107.559	0.341811	0.350078	0.976386	0.328873	0.476192
Acin1	2618.94	-0.316348	0.11207	-2.82278	0.00476092	0.0177793
Ackr2	51.1356	2.41076	0.460272	5.23769	1.63e-07	3.84e-06
Ackr3	1329.28	0.840103	0.252523	3.32684	0.000878353	0.00460199
Ackr4	110.39	1.11923	0.388208	2.88306	0.00393839	0.0152459
Acly	1492.2	-0.224404	0.19298	-1.16283	0.244897	0.383214
Acmsd	12.254	1.68322	0.822222	2.04716	0.0406424	0.0973677
Acnat2	2.78081	1.94128	1.09429	1.774	0.0760627	NA
Aco1	1381.79	0.195022	0.14537	1.34156	0.17974	0.30362
Aco2	34428.2	1.40486	0.322857	4.35134	1.35e-05	0.000153441
Acod1	84.4802	-0.208492	0.644611	-0.323438	0.746364	0.835407
Acot1	22.3498	2.18225	0.555462	3.9287	8.54e-05	0.000703144
Acot11	223.567	1.21657	0.191963	6.33751	2.34e-10	1.27e-08
Acot12	3.16773	0.109984	0.933018	0.11788	0.906163	NA
Acot13	1080.25	1.22078	0.453185	2.69378	0.0070647	0.0243781
Acot2	2180.02	1.75623	0.326122	5.38519	7.24e-08	1.92e-06
Acot3	191.896	0.754843	0.205961	3.66498	0.00024736	0.00166808
Acot4	8.47641	1.04836	0.803724	1.30438	0.192104	0.319082
Acot6	6.11673	0.775838	0.773221	1.00338	0.315675	0.462266
Acot7	1090.62	-0.451747	0.125039	-3.61286	0.000302839	0.00195403
Acot8	298.008	-0.221879	0.159815	-1.38835	0.165031	0.284436
Acot9	1210.91	0.109555	0.133908	0.818136	0.41328	0.561687
Acox1	4079.51	0.960786	0.215254	4.4635	8.06e-06	0.000101235
Acox2	2.59729	0.154294	1.79133	0.0861341	0.93136	NA
Acox3	442.625	0.703991	0.196283	3.58662	0.000334991	0.00211983
Acoxl	2.43406	-0.835466	1.34783	-0.619858	0.535351	NA
Acp1	1322.68	-0.41048	0.141494	-2.90105	0.00371917	0.0146183
Acp2	500.783	-0.374951	0.132822	-2.82296	0.00475827	0.0177793
Acp4	6.41074	-0.524386	0.83505	-0.62797	0.530024	0.667339
Acp5	92.7739	-0.286954	0.268332	-1.0694	0.28489	0.428541
Acp6	376.412	0.185835	0.148214	1.25383	0.209905	0.342029
Acpp	101.661	-0.687658	0.368677	-1.86521	0.0621525	0.13553
Acr	5.37592	-0.434751	0.835367	-0.520431	0.602763	0.7271
Acrbp	31.7447	-0.658258	0.405407	-1.6237	0.10444	0.202025
Acsbg1	3.536	0.316763	1.0737	0.29502	0.767978	NA
Acsf2	2844.79	1.46612	0.267826	5.47417	4.4e-08	1.23e-06
Acsf3	717.507	0.547015	0.177698	3.07833	0.00208161	0.00916697
Acsl1	10431.3	1.86575	0.369308	5.05202	4.37e-07	8.84e-06
Acsl3	392.703	-0.441028	0.176237	-2.50246	0.0123332	0.0381983
Acsl4	744	-0.545897	0.228515	-2.38888	0.0168997	0.0490338
Acsl5	1563.66	-0.75867	0.149454	-5.07628	3.85e-07	7.94e-06
Acsl6	349.71	2.15146	0.800361	2.68811	0.00718582	0.0247126
Acsm2	1.02668	-1.00828	2.00585	-0.50267	0.615196	NA
Acsm3	4.40707	0.468881	0.800999	0.585371	0.558298	NA
Acsm5	7.3718	-0.24627	0.879857	-0.279897	0.779556	0.858689
Acss1	4030.45	2.02885	0.72685	2.7913	0.00524972	0.0192328
Acss2	1345.83	1.10918	0.279626	3.96663	7.29e-05	0.000622076
Acss3	133.96	1.44341	0.331631	4.35248	1.35e-05	0.000153029
Acta1	32549.9	0.211948	0.332125	0.638158	0.523371	0.661882
Acta2	3387	-0.706721	0.234814	-3.0097	0.00261507	0.0109785
Actb	30168.7	-0.603124	0.313962	-1.92101	0.0547305	0.122857
Actbl2	1.54955	-0.159544	1.97509	-0.0807782	0.935618	NA
Actc1	117895	0.911931	0.24776	3.68071	0.000232586	0.00158825
Actg2	245.011	-1.1163	0.359408	-3.10593	0.00189681	0.0084943
Actl10	6.35705	-0.385436	0.664314	-0.580202	0.561778	0.694181
Actl6a	714.19	-0.111507	0.156378	-0.713065	0.475806	0.619039
Actl7a	4.89904	-1.43078	0.838895	-1.70555	0.0880913	0.177864
Actl7b	5.84271	-1.22996	0.80233	-1.53298	0.12528	0.231679
Actn1	2715.89	-0.839975	0.343703	-2.4439	0.0145294	0.0434845
Actn2	23987.2	1.45758	0.336281	4.33442	1.46e-05	0.000163158
Actn3	4.38216	0.609276	0.940564	0.647778	0.517129	NA
Actn4	6364.43	-0.37568	0.169069	-2.22205	0.0262798	0.069398
Actr10	1488.92	0.023717	0.0811653	0.292207	0.770129	0.852219
Actr1a	3842.48	-0.118053	0.0769499	-1.53415	0.124992	0.231203
Actr1b	2849.06	0.105687	0.152312	0.693886	0.487754	0.630187
Actr2	2491.57	-0.168006	0.29757	-0.564595	0.572349	0.702359
Actr3	7307.63	-0.515404	0.21525	-2.39444	0.0166458	0.0484897
Actr3b	257.159	0.805767	0.317831	2.53521	0.011238	0.0355274
Actr5	182.239	-0.427734	0.155265	-2.75487	0.00587157	0.0210916
Actr6	325.722	0.177461	0.17234	1.02971	0.303145	0.448438
Actr8	535.719	0.126803	0.107246	1.18236	0.237063	0.374525
Acvr1	630.897	0.416386	0.126755	3.28498	0.00101991	0.00518362
Acvr1b	683.438	0.108609	0.0933392	1.1636	0.244588	0.382889
Acvr2a	576.582	0.438811	0.131051	3.34841	0.000812778	0.00432766
Acvr2b	28.7765	0.759707	0.33689	2.25506	0.0241295	0.0646923
Acvrl1	2076.65	-0.0951023	0.149831	-0.634732	0.525603	0.663816
Acy1	575.241	-0.242441	0.123868	-1.95725	0.0503181	0.11509
Acy3	59.8541	0.126277	0.25672	0.491886	0.6228	0.743892
Acyp1	335.729	0.154686	0.218213	0.708877	0.478401	0.621613
Acyp2	764.12	1.16907	0.375725	3.1115	0.00186141	0.00837553
Ada	630.63	-0.319806	0.136759	-2.33846	0.0193633	0.0545677
Adad1	1.63538	-0.813506	1.43626	-0.566407	0.571117	NA
Adal	79.6649	-0.0138018	0.218872	-0.0630589	0.94972	0.970611
Adam10	2011.63	0.616627	0.129059	4.77788	1.77e-06	2.85e-05
Adam11	41.7726	0.639371	0.504786	1.26662	0.205292	0.335963
Adam12	152.87	-0.213091	0.578985	-0.368043	0.712842	0.811965
Adam15	3335.43	-0.146329	0.142449	-1.02723	0.30431	0.449722
Adam17	1632.79	-0.285063	0.193234	-1.47522	0.140153	0.252176
Adam19	3201	0.527397	0.13276	3.97255	7.11e-05	0.000609546
Adam1a	503.062	1.16943	0.269859	4.33346	1.47e-05	0.000163384
Adam22	4.62866	-0.432328	0.925118	-0.467322	0.64027	NA
Adam23	81.0281	0.862064	0.2358	3.65591	0.000256274	0.00171587
Adam30	4.31206	-1.98297	1.17683	-1.68501	0.0919871	NA
Adam32	2.04784	-0.835029	1.47574	-0.565836	0.571505	NA
Adam33	193.608	0.670962	0.542588	1.2366	0.216237	0.349669
Adam4	14.5956	-0.126085	0.572731	-0.220147	0.825757	0.891633
Adam8	510.175	-0.833526	0.380653	-2.18973	0.028544	0.0739296
Adam9	1274.05	0.416487	0.15824	2.632	0.00848845	0.0283042
Adamts1	1968.36	0.0072869	0.248919	0.0292742	0.976646	0.986772
Adamts10	1244.83	-0.0049613	0.219183	-0.0226354	0.981941	0.989628
Adamts12	506.416	0.986057	0.181477	5.4335	5.53e-08	1.5e-06
Adamts13	23.3687	-4.4406	1.00646	-4.4121	1.02e-05	0.000122434
Adamts14	137.251	-0.776244	0.208673	-3.71991	0.000199296	0.00140409
Adamts15	447.469	0.537933	0.33698	1.59634	0.110413	0.210252
Adamts16	1.6904	0.949872	1.69347	0.560902	0.574865	NA
Adamts17	45.2757	0.820901	0.449486	1.82631	0.0678031	0.145251
Adamts19	321.475	1.21366	0.267181	4.54248	5.56e-06	7.39e-05
Adamts2	1465.82	0.648963	0.201831	3.21538	0.00130273	0.00628884
Adamts20	9.98824	1.1135	0.696985	1.59759	0.110134	0.209889
Adamts3	25.3777	0.367612	0.431534	0.851874	0.394284	0.542151
Adamts4	297.274	-1.11803	0.534208	-2.09288	0.0363601	0.0893186
Adamts5	329.572	0.774685	0.236315	3.27819	0.00104476	0.00528005
Adamts6	75.1006	0.102812	0.258727	0.397377	0.69109	0.795527
Adamts7	775.092	0.231234	0.118616	1.94943	0.0512443	0.116485
Adamts8	139.616	-0.0474053	0.427626	-0.110857	0.91173	0.947749
Adamts9	1134.71	0.257608	0.228909	1.12537	0.260431	0.401042
Adamtsl2	389.901	0.494461	0.487284	1.01473	0.310235	0.456298
Adamtsl3	341.178	0.775499	0.18261	4.24675	2.17e-05	0.000226255
Adamtsl4	1098.75	1.1562	0.338372	3.41696	0.000633251	0.00354794
Adamtsl5	367.812	0.0924055	0.377896	0.244526	0.806823	0.87822
Adap1	199.929	-1.04442	0.374749	-2.78699	0.00532008	0.0194341
Adap2	140.1	-0.00559672	0.313545	-0.0178498	0.985759	0.991583
Adar	965.868	0.602023	0.150348	4.00419	6.22e-05	0.000544057
Adarb1	743.646	-0.0674053	0.118181	-0.570355	0.568437	0.699216
Adat1	68.3773	-0.365413	0.227976	-1.60286	0.108966	0.208348
Adat2	17.358	0.270185	0.453437	0.595861	0.551268	0.685624
Adck1	176.654	0.254186	0.153528	1.65564	0.0977957	0.19242
Adck2	273.444	0.100722	0.157865	0.638027	0.523456	0.661934
Adck5	337.694	-0.203014	0.122963	-1.65102	0.0987349	0.193612
Adcy1	72.0401	1.75638	0.446149	3.93676	8.26e-05	0.000684315
Adcy10	21.9465	-0.266347	0.413633	-0.64392	0.519627	0.658526
Adcy2	75.4976	-0.260077	0.241387	-1.07743	0.281289	0.424675
Adcy3	331.214	-0.565401	0.183797	-3.07623	0.00209636	0.00921098
Adcy4	917.336	-0.492392	0.183604	-2.68182	0.00732225	0.0250913
Adcy5	2490.25	1.53987	0.252851	6.09003	1.13e-09	5.15e-08
Adcy6	2591.66	0.652797	0.209366	3.11797	0.00182099	0.00824522
Adcy7	517.813	-0.301391	0.287745	-1.04742	0.294905	0.43976
Adcy9	170.343	0.707445	0.197766	3.57717	0.00034733	0.002179
Adcyap1r1	346.245	0.16277	0.175821	0.925769	0.354566	0.50279
Add1	3708.94	-0.0578375	0.106399	-0.54359	0.586724	0.714484
Add2	48.4079	-0.30378	0.724799	-0.419124	0.675126	0.783119
Add3	1754.65	0.501962	0.142487	3.52286	0.000426913	0.00258769
Adgb	213.324	-0.201165	0.219221	-0.917634	0.35881	0.507327
Adgra1	8.38341	1.35843	0.966495	1.40553	0.159865	0.278583
Adgra2	877.156	0.0573623	0.187686	0.305629	0.759887	0.844723
Adgra3	542.568	0.0970359	0.111041	0.873872	0.382188	0.530895
Adgrb2	29.3739	0.00969167	0.404478	0.0239609	0.980884	0.989415
Adgrd1	70.4039	1.20098	0.334718	3.58803	0.000333188	0.00211196
Adgre1	515.45	1.67925	0.321286	5.22665	1.73e-07	4.01e-06
Adgre4	26.734	0.699728	0.666893	1.04924	0.294069	0.438794
Adgre5	1359.42	0.0504632	0.157318	0.320771	0.748384	0.836738
Adgrf2	63.242	-0.00225621	0.275846	-0.00817923	0.993474	0.996679
Adgrf5	6831.73	0.953762	0.143006	6.66939	2.57e-11	1.83e-09
Adgrg1	2524.24	0.221494	0.145861	1.51853	0.128881	0.236802
Adgrg2	46.0773	0.543368	0.436132	1.24588	0.212809	0.345457
Adgrg3	58.1509	0.226442	0.389864	0.580825	0.561359	0.693983
Adgrg5	75.3853	0.032247	0.320606	0.100581	0.919883	0.952858
Adgrg6	192.447	0.280919	0.369117	0.761056	0.446623	0.593912
Adgrg7	4.05195	0.0846106	1.11199	0.0760894	0.939348	NA
Adgrl1	634.075	-0.0502222	0.132523	-0.378969	0.704711	0.805742
Adgrl2	1563.05	0.605041	0.134629	4.49413	6.99e-06	8.96e-05
Adgrl3	35.9977	0.146563	0.365185	0.40134	0.68817	0.79304
Adgrl4	1624.63	-0.0137709	0.117507	-0.117192	0.906708	0.944148
Adgrv1	71.7378	1.82848	0.582272	3.14024	0.00168809	0.00775504
Adh5	1170.39	0.0706544	0.097364	0.725672	0.46804	0.612051
Adh6	18.7779	2.20034	0.744959	2.95363	0.00314058	0.0127612
Adh6a	1.19854	0.331778	1.91305	0.173429	0.862314	NA
Adh7	8.49946	2.21243	0.79275	2.79083	0.00525724	0.0192464
Adhfe1	552.314	1.81437	0.501837	3.61545	0.000299823	0.00193852
Adi1	341.133	-0.0893736	0.183812	-0.486224	0.626808	0.746801
Adipoq	461.596	-1.30858	0.270862	-4.83115	1.36e-06	2.3e-05
Adipor1	3287.07	0.214245	0.105963	2.02189	0.0431875	0.101993
Adipor2	474.202	0.528755	0.261397	2.02281	0.0430931	0.101834
Adk	1303.02	0.62693	0.255674	2.45206	0.0142039	0.0427306
Adm	232.945	0.275698	0.164794	1.67299	0.0943296	0.187012
Adnp	1557.55	0.00121215	0.0857255	0.0141399	0.988718	0.993394
Adnp2	283.535	0.0802415	0.225303	0.356149	0.721729	0.817956
Ado	92.1641	-0.325966	0.296891	-1.09793	0.272234	0.414223
Adora1	139.265	1.35469	0.343965	3.93845	8.2e-05	0.000681204
Adora2a	531.071	0.0225753	0.134414	0.167953	0.86662	0.919585
Adora2b	55.7891	-0.562259	0.247103	-2.2754	0.0228818	0.0620298
Adora3	8.32681	0.048805	0.600443	0.0812818	0.935218	0.961555
Adpgk	644.666	-0.656149	0.141165	-4.64811	3.35e-06	4.87e-05
Adprh	613.159	-0.145378	0.0995003	-1.46109	0.143992	0.257593
Adprhl1	2080.49	1.30644	0.436093	2.99578	0.00273745	0.0114004
Adprhl2	819.805	-0.654639	0.124884	-5.24197	1.59e-07	3.77e-06
Adprm	336.075	-0.193586	0.128212	-1.50989	0.131072	0.239951
Adra1a	120.518	1.72642	0.22808	7.56937	3.75e-14	4.72e-12
Adra1b	988.904	1.5081	0.436888	3.4519	0.000556646	0.00320924
Adra1d	210.852	0.839942	0.294352	2.85353	0.00432361	0.0164477
Adra2a	4.39149	0.148318	1.23827	0.119778	0.904659	NA
Adra2b	33.0038	0.581498	0.533831	1.08929	0.276025	0.418484
Adra2c	4.31227	0.498369	1.00711	0.494851	0.620705	NA
Adrb1	194.601	1.58025	0.242946	6.50453	7.79e-11	4.88e-09
Adrb2	205.766	-0.0682247	0.150605	-0.453003	0.650546	0.763736
Adrm1	1815.31	-0.223508	0.10636	-2.10143	0.0356031	0.0878303
Adsl	1525.36	-0.124387	0.148898	-0.835383	0.403502	0.552125
Adss	1631.37	-0.839367	0.247214	-3.3953	0.000685528	0.00377503
Adssl1	3288.39	1.55646	0.454933	3.4213	0.000623233	0.00350612
Adtrp	12.6253	0.505383	0.805118	0.627713	0.530192	0.667354
Aebp1	2406.88	-0.278586	0.153068	-1.82001	0.0687571	0.146961
Aebp2	190.422	0.0280614	0.232333	0.120781	0.903865	0.942553
Aen	384.254	-1.08311	0.205331	-5.27495	1.33e-07	3.21e-06
Afap1	961.276	0.257794	0.157467	1.63713	0.101602	0.197568
Afap1l1	1730.82	0.364206	0.133831	2.72138	0.00650095	0.0228897
Afap1l2	347.323	0.391442	0.204132	1.9176	0.0551622	0.123642
Afdn	945.378	0.6273	0.133588	4.69577	2.66e-06	4.02e-05
Aff1	329.929	0.623414	0.28495	2.1878	0.0286839	0.0741013
Aff1-as1	6.70426	1.31599	0.826561	1.59212	0.111357	0.211658
Aff2	30.6955	-0.355391	0.312	-1.13907	0.254672	0.394627
Aff3	79.9934	0.620098	0.342242	1.81187	0.0700066	0.149041
Aff4	1602.08	0.310766	0.112755	2.75613	0.00584903	0.0210206
Afg3l1	1331.99	-0.253553	0.106077	-2.39026	0.0168364	0.0489064
Afg3l2	2214.41	0.671698	0.128408	5.23098	1.69e-07	3.93e-06
Afmid	131.906	0.144396	0.277706	0.51996	0.603091	0.727437
Aftph	553.656	0.0762472	0.193414	0.394217	0.693421	0.797057
Aga	518.294	-0.118929	0.130541	-0.911041	0.362274	0.510509
Agap1	932.443	0.343953	0.14664	2.34557	0.0189983	0.0538154
Agap2	307.931	0.716684	0.191654	3.73947	0.000184409	0.00131577
Agap3	1391.49	-0.263213	0.104844	-2.51052	0.0120555	0.0375383
Agbl2	8.72796	0.017998	0.633598	0.0284061	0.977338	0.987292
Agbl3	26.5036	-0.109247	0.379048	-0.288214	0.773183	0.854534
Agbl4	8.76142	0.674832	0.584348	1.15485	0.248153	0.387027
Agbl5	83.1785	0.152368	0.211294	0.721118	0.470837	0.614321
Ager	147.224	-0.0555413	0.283822	-0.195691	0.844852	0.904173
Agfg1	1022.26	0.243822	0.240992	1.01175	0.31166	0.457875
Agfg2	658.055	0.545082	0.142215	3.83281	0.000126689	0.000973365
Aggf1	347.093	0.0677975	0.141126	0.480402	0.630941	0.750019
Agk	342.767	0.455443	0.127233	3.57959	0.00034414	0.00216233
Agl	3722.71	1.35211	0.251407	5.37819	7.52e-08	1.98e-06
Agmat	16.5636	-0.967657	0.422621	-2.28966	0.0220413	0.0603469
Agmo	15.6447	0.22881	0.461691	0.495591	0.620183	0.741481
Ago1	104.968	0.501372	0.287031	1.74675	0.0806803	0.166327
Ago2	250.725	0.310542	0.240455	1.29148	0.196539	0.324805
Ago3	43.2618	0.294429	0.358345	0.821637	0.411284	0.559694
Ago4	32.1365	0.685438	0.365889	1.87335	0.0610199	0.133619
Agpat1	1658.62	-0.209772	0.116496	-1.80068	0.0717528	0.152073
Agpat2	307.426	-0.173679	0.196922	-0.881972	0.377792	0.526871
Agpat3	1344	0.787565	0.234204	3.36273	0.000771745	0.0041618
Agpat4	416.022	-0.715764	0.166871	-4.28933	1.79e-05	0.000193401
Agpat5	689.525	-0.260127	0.142005	-1.83182	0.0669777	0.143768
Agps	389.152	0.18158	0.313461	0.579275	0.562403	0.694498
Agr2	7.2371	2.07333	1.17044	1.77141	0.0764925	0.159544
Agr3	3.80017	0.0446929	0.951774	0.0469575	0.962547	NA
Agrn	3423.43	0.491817	0.197829	2.48606	0.0129165	0.0396949
Agrp	1.09078	-1.08842	2.23012	-0.488054	0.625512	NA
Agt	18.9958	0.498144	0.45698	1.09008	0.275679	0.418085
Agtpbp1	2500.49	0.707168	0.18126	3.9014	9.56e-05	0.000776259
Agtr1a	84.8133	-0.27531	0.239844	-1.14787	0.251021	0.390291
Agtrap	525.556	-0.254913	0.162314	-1.57049	0.116301	0.219042
Ahctf1	756.274	-0.292279	0.116701	-2.50452	0.0122619	0.0380413
Ahcy	1395.37	-0.65922	0.188457	-3.49798	0.000468804	0.0027923
Ahcyl1	2478.24	-0.210932	0.130524	-1.61604	0.106085	0.204259
Ahcyl2	193.593	-0.122853	0.194063	-0.633058	0.526696	0.66464
Ahdc1	1015.45	0.44951	0.0970112	4.63359	3.59e-06	5.11e-05
Ahi1	169.226	0.0119521	0.179282	0.0666664	0.946847	0.968913
Ahnak	22499.5	0.357773	0.0839462	4.26194	2.03e-05	0.000213772
Ahr	598.256	-0.129424	0.175581	-0.737115	0.461053	0.605951
Ahrr	4.75415	-0.746022	0.910023	-0.819783	0.41234	NA
Ahsa1	2330.59	-0.216631	0.0981031	-2.2082	0.0272305	0.0713321
Ahsa2	526.145	-0.422354	0.153789	-2.74632	0.00602687	0.0215521
Ahsp	25.9436	-0.772703	0.735675	-1.05033	0.293566	0.438249
Aida	1576.59	-0.439679	0.1302	-3.37694	0.000732976	0.00397687
Aif1	905.384	-0.615669	0.19224	-3.2026	0.00136191	0.00652655
Aif1l	504.581	-0.256043	0.204837	-1.24998	0.211305	0.343591
Aifm1	2058.09	0.64777	0.188613	3.43438	0.0005939	0.00337504
Aifm2	332.066	0.120599	0.137652	0.876114	0.380968	0.529639
Aifm3	23.5173	-0.703984	0.464656	-1.51506	0.129756	0.238092
Aig1	246.938	-0.430568	0.155997	-2.76011	0.00577827	0.0208109
Aim2	36.0866	-0.859183	0.338696	-2.53674	0.0111891	0.0353878
Aimp1	902.272	-0.433978	0.126994	-3.41732	0.000632418	0.00354532
Aimp2	772.279	-0.399279	0.164725	-2.42391	0.0153544	0.0455028
Aip	946.429	-0.0204867	0.0955799	-0.214341	0.830281	0.894728
Ajap1	15.779	-0.252195	0.569318	-0.442977	0.657782	0.76968
Ajm1	7.76215	0.191893	0.723164	0.265352	0.790738	0.866205
Ajuba	483.592	0.0748119	0.157137	0.476093	0.634008	0.752401
Ak2	1641.46	-0.481991	0.105782	-4.55644	5.2e-06	7e-05
Ak3	1715.9	0.455919	0.191064	2.38622	0.0170227	0.0492978
Ak4	172.094	1.85985	0.187708	9.9082	3.83e-23	2.15e-20
Ak6	844.385	-0.716951	0.201781	-3.55311	0.000380711	0.00235393
Akain1	4.38572	0.748693	0.918341	0.815268	0.414919	NA
Akap1	3234.23	0.951563	0.221384	4.29824	1.72e-05	0.000186548
Akap10	420.254	0.168181	0.169674	0.991204	0.321586	0.468469
Akap11	909.396	0.509724	0.110097	4.62978	3.66e-06	5.18e-05
Akap12	1274.56	0.586022	0.154254	3.79907	0.000145238	0.00108659
Akap13	3075.32	0.516745	0.0821424	6.29084	3.16e-10	1.68e-08
Akap14	1.06538	-0.92782	1.95567	-0.474426	0.635196	NA
Akap17a	1362.59	-0.422403	0.165221	-2.5566	0.01057	0.0337974
Akap17b	161.987	0.465215	0.33457	1.39049	0.164382	0.283642
Akap2	2225.75	0.652476	0.262978	2.4811	0.0130977	0.0401544
Akap3	9.38173	1.1099	0.743742	1.49232	0.135616	0.245972
Akap4	3.07118	1.91043	1.08139	1.76665	0.0772869	NA
Akap5	8.83406	0.820648	0.594929	1.37941	0.16777	0.288071
Akap6	1870.45	2.08899	0.255628	8.17202	3.03e-16	5.8e-14
Akap7	90.1379	0.906601	0.288592	3.14146	0.00168105	0.00773448
Akap8	1122.83	-0.310744	0.095375	-3.25813	0.0011215	0.0055633
Akap8l	862.465	0.280928	0.329243	0.853253	0.393519	0.541214
Akap9	1278.17	0.516926	0.135516	3.81451	0.000136456	0.00103524
Akip1	554.725	-0.382095	0.23609	-1.61843	0.105571	0.203503
Akirin1	930.09	-0.107416	0.125497	-0.855925	0.392039	0.539813
Akirin2	949.033	-0.118299	0.115583	-1.0235	0.306072	0.451487
Akna	492.732	-0.259766	0.246386	-1.05431	0.291743	0.436401
Akr1a1	8092.95	-0.378421	0.103686	-3.64967	0.000262577	0.00174724
Akr1b1	3601.1	0.358903	0.194865	1.8418	0.0655038	0.141187
Akr1b8	295.104	-0.472766	0.349715	-1.35186	0.17642	0.299117
Akr1c12	2.67931	-1.51031	1.11141	-1.35892	0.174171	NA
Akr1c13	17.5054	0.56269	0.450151	1.25	0.211299	0.343591
Akr1c14	1141.77	0.142432	0.161555	0.881633	0.377975	0.526933
Akr1c15	4282.63	1.16862	0.338732	3.44999	0.000560606	0.00322343
Akr1c19	132.983	0.500863	0.428536	1.16878	0.242494	0.380558
Akr1c3	3.85583	0.69564	1.45333	0.478652	0.632186	NA
Akr1d1	51.3594	-0.552776	0.37272	-1.48309	0.138051	0.249255
Akr1e2	179.823	0.170272	0.259028	0.65735	0.510956	0.650703
Akr7a2	590.025	0.177115	0.159166	1.11277	0.265805	0.407206
Akr7a3	7.14026	0.115163	0.800078	0.14394	0.885548	0.931231
Akt1	6440.29	-0.147902	0.0993146	-1.48923	0.136428	0.247003
Akt1s1	1182.91	-0.0774648	0.134767	-0.574807	0.565422	0.696801
Akt2	1884.03	0.650065	0.118956	5.46473	4.64e-08	1.29e-06
Akt3	317.254	-0.102778	0.192111	-0.534994	0.592654	0.719499
Aktip	799.081	0.227066	0.12696	1.78849	0.0736975	0.155172
Alad	779.558	-0.105369	0.2207	-0.47743	0.633056	0.751588
Alas1	5100.12	0.661932	0.216775	3.05354	0.00226161	0.00976326
Alas2	924.34	-0.0993145	0.557297	-0.178207	0.85856	0.913858
Alcam	586.211	-0.775015	0.306043	-2.53237	0.0113294	0.0357417
Aldh16a1	953.796	-0.448272	0.120729	-3.71303	0.000204789	0.00143476
Aldh18a1	232.409	-1.05338	1.25675	-0.838177	0.401931	0.550474
Aldh1a1	1116.18	1.49752	0.320925	4.66626	3.07e-06	4.52e-05
Aldh1a2	184.122	1.11391	0.275045	4.04994	5.12e-05	0.000465613
Aldh1a3	129.24	1.07178	0.437511	2.44971	0.014297	0.0429677
Aldh1b1	1.63673	1.01037	1.60138	0.630934	0.528084	NA
Aldh1l1	8.35309	0.196014	0.798692	0.245419	0.806132	0.877745
Aldh1l2	92.588	-0.540268	0.311281	-1.73563	0.08263	0.169403
Aldh2	6970.88	0.852169	0.188072	4.53109	5.87e-06	7.7e-05
Aldh3a1	58.1594	3.03401	0.641772	4.72755	2.27e-06	3.52e-05
Aldh3a2	1052.18	0.210207	0.0924854	2.27287	0.023034	0.0624088
Aldh3b1	231.913	-0.610219	0.225583	-2.70507	0.00682891	0.0238003
Aldh5a1	880.607	1.36094	0.369221	3.68598	0.00022782	0.00156277
Aldh6a1	6132.36	1.83628	0.342657	5.35894	8.37e-08	2.18e-06
Aldh7a1	1525.7	0.0302711	0.251061	0.120572	0.90403	0.94266
Aldh8a1	85.6082	1.01591	0.396761	2.56051	0.0104518	0.0334745
Aldh9a1	2262.5	0.499093	0.178583	2.79474	0.00519407	0.0190567
Aldoa	36758	0.565104	0.194975	2.89834	0.00375146	0.0147184
Aldoart2	5.81644	-0.0688072	0.747093	-0.0920999	0.926619	0.956377
Aldob	2.47831	0.710697	1.47075	0.48322	0.62894	NA
Aldoc	59.0125	0.739699	0.324355	2.28052	0.0225768	0.0614566
Alg1	161.617	-0.432843	0.192246	-2.2515	0.0243538	0.0652011
Alg10	152.431	0.516149	0.305294	1.69067	0.0909007	0.181982
Alg11	303.789	-0.219557	0.150308	-1.46072	0.144093	0.257668
Alg12	266.104	-0.604601	0.164645	-3.67216	0.000240514	0.00163132
Alg14	455.304	-0.215835	0.138029	-1.5637	0.117888	0.220931
Alg2	382.878	-0.469449	0.162719	-2.88503	0.00391376	0.015202
Alg3	335.184	-0.402295	0.223925	-1.79656	0.0724057	0.153058
Alg5	328.812	-0.472735	0.183286	-2.57921	0.00990254	0.0320638
Alg6	101.76	0.257577	0.205325	1.25449	0.209665	0.341675
Alg8	154.199	-0.823673	0.258274	-3.18915	0.00142694	0.00678258
Alg9	287.115	-0.723377	0.197785	-3.65739	0.000254792	0.0017071
Alk	4.92954	-0.584683	0.827841	-0.706275	0.480017	0.623176
Alkal2	17.3659	1.74691	0.871952	2.00345	0.045129	0.105418
Alkbh1	712.826	-0.237953	0.118516	-2.00777	0.0446672	0.104676
Alkbh2	94.7579	-0.00293302	0.27005	-0.010861	0.991334	0.995155
Alkbh3	1581.71	0.505714	0.243312	2.07846	0.0376671	0.0916794
Alkbh4	89.4816	-0.516287	0.211609	-2.43981	0.014695	0.043894
Alkbh5	1069.97	0.461517	0.132956	3.47121	0.000518112	0.00302633
Alkbh6	224.006	-0.41091	0.169246	-2.42789	0.0151869	0.0450684
Alkbh7	484.223	0.429216	0.30559	1.40455	0.160156	0.278833
Alkbh8	55.9822	0.0143126	0.241078	0.059369	0.952658	0.972488
Alms1	371.798	-0.141344	0.129579	-1.09079	0.275364	0.417734
Alox12	53.8737	-0.908292	0.300562	-3.02198	0.00251131	0.010624
Alox12e	4.54849	4.6352	1.73285	2.67491	0.007475	NA
Alox15	629.086	0.594861	0.506096	1.17539	0.239838	0.377961
Alox5	149.454	0.527999	0.355775	1.48408	0.137787	0.248867
Alox5ap	505.683	-0.439967	0.268419	-1.63911	0.101191	0.19703
Aloxe3	230.014	0.286609	0.305884	0.936985	0.348766	0.496638
Alpg	12.4431	2.0947	0.812434	2.5783	0.00992876	0.0321143
Alpk1	259.088	0.232134	0.199957	1.16092	0.245673	0.38423
Alpk2	1870.26	1.82029	0.294345	6.18422	6.24e-10	2.98e-08
Alpk3	2988.97	1.52005	0.311347	4.88217	1.05e-06	1.86e-05
Alpl	565.843	1.16434	0.350442	3.32249	0.000892163	0.00464854
Alpp	3.62122	-0.0212281	1.66363	-0.0127602	0.989819	NA
Als2	489.098	-0.0742416	0.124742	-0.59516	0.551736	0.685911
Als2cl	190.26	0.382004	0.164489	2.32237	0.0202132	0.0564154
Alx3	8.52734	1.02096	0.75422	1.35367	0.175842	0.298341
Alx4	1.15157	-0.422119	2.15937	-0.195483	0.845015	NA
Alyref	1278.94	-0.849194	0.190518	-4.4573	8.3e-06	0.000103599
Amacr	235.218	0.53879	0.200459	2.68778	0.00719279	0.0247206
Ambra1	698.04	0.0490535	0.125511	0.39083	0.695923	0.799093
Amd1	2315.99	0.0256798	0.123904	0.207255	0.83581	0.897998
Amdhd2	514.238	-1.09062	0.178428	-6.11241	9.81e-10	4.53e-08
Amer1	74.2125	1.34226	0.269901	4.97316	6.59e-07	1.25e-05
Amfr	2197.28	0.395819	0.150626	2.62782	0.0085933	0.0285907
Amh	8.20831	-0.566888	0.59327	-0.955531	0.339309	0.486961
Amhr2	69.922	0.756318	0.422414	1.79047	0.0733791	0.154632
Amigo1	578.875	0.981343	0.244845	4.00802	6.12e-05	0.000536786
Amigo2	232.578	0.323847	0.213553	1.51647	0.129401	0.237525
Ammecr1	22.0329	0.878948	0.412849	2.12898	0.0332558	0.083112
Ammecr1l	773.219	-0.0709255	0.133516	-0.531215	0.59527	0.72117
Amn1	143.36	0.0977694	0.208562	0.468779	0.639227	0.755696
Amot	137.348	0.264133	0.202857	1.30207	0.192894	0.320112
Amotl1	558.427	0.410504	0.210496	1.95017	0.0511555	0.116349
Amotl2	1608.55	0.30631	0.120591	2.54007	0.011083	0.0351478
Ampd1	5.71345	2.0683	0.859545	2.40627	0.0161163	0.0471869
Ampd2	589.424	-0.611535	0.150002	-4.07686	4.56e-05	0.000423015
Ampd3	1107.76	1.04296	0.23804	4.38145	1.18e-05	0.000137033
Amph	13.9309	0.254141	0.77988	0.325872	0.744521	0.833906
Amt	132.445	0.603001	0.404716	1.48994	0.136241	0.24671
Amz1	206.147	-0.628184	0.207254	-3.03098	0.00243758	0.0103659
Amz2	1071.39	0.415087	0.187263	2.21661	0.0266499	0.0700814
Anapc1	971.244	-0.188933	0.176289	-1.07173	0.283843	0.42753
Anapc10	228.001	-0.403506	0.157998	-2.55386	0.0106537	0.0340131
Anapc11	933.949	-0.403547	0.140352	-2.87524	0.00403717	0.0155679
Anapc13	841.664	0.155181	0.253588	0.611942	0.540576	0.67656
Anapc15	141.001	-0.898503	0.173297	-5.18475	2.16e-07	4.84e-06
Anapc16	481.458	0.0964242	0.183225	0.526262	0.598706	0.723824
Anapc2	1261.39	0.042829	0.123524	0.346726	0.728797	0.823377
Anapc4	956.309	-0.0644949	0.123878	-0.520632	0.602623	0.727047
Anapc5	5826.47	-0.102461	0.0961631	-1.06549	0.286655	0.430625
Anapc7	585.818	-0.148466	0.101194	-1.46714	0.142337	0.255103
Ang2	9.2267	-0.471109	0.577301	-0.816054	0.414469	0.56305
Angel1	261.001	0.0198815	0.159748	0.124455	0.900955	0.941197
Angel2	639.805	0.169941	0.106923	1.58937	0.111976	0.212594
Angpt1	220.057	2.65413	0.31397	8.45346	2.83e-17	6.78e-15
Angpt2	268.715	-0.0207648	0.312086	-0.0665355	0.946952	0.968927
Angpt4	2.53702	-2.0365	1.7356	-1.17337	0.240649	NA
Angptl1	290.926	1.78124	0.390675	4.55939	5.13e-06	6.91e-05
Angptl2	817.292	0.526925	0.217108	2.42702	0.0152235	0.0451681
Angptl4	850.49	-1.0717	0.550813	-1.94566	0.0516952	0.117298
Angptl6	2.25642	-0.315517	1.24604	-0.253215	0.800102	NA
Angptl7	9.86963	1.27439	0.716259	1.77922	0.0752032	0.157529
Angptl8	4.13874	-0.383617	0.858235	-0.446983	0.654887	NA
Ank1	760.624	1.53525	0.457478	3.3559	0.00079108	0.00424184
Ank2	742.59	1.8159	0.140966	12.8819	5.69e-38	9.56e-35
Ank3	1014.46	0.566986	0.102852	5.51265	3.53e-08	1.02e-06
Ankar	7.83342	0.893489	0.753345	1.18603	0.235611	0.373288
Ankdd1a	26.7716	-0.868864	0.405018	-2.14525	0.031933	0.0804719
Ankdd1b	2.5712	-0.961798	1.17867	-0.816005	0.414497	NA
Ankfy1	1358.48	-0.07097	0.124889	-0.568265	0.569855	0.70017
Ankh	2210.52	0.477967	0.202984	2.3547	0.0185374	0.0528317
Ankib1	670.458	0.170224	0.100223	1.69844	0.089424	0.179836
Ankle1	89.2203	-1.38546	0.403483	-3.43375	0.00059529	0.0033804
Ankle2	450.616	0.337799	0.176483	1.91406	0.0556127	0.124449
Ankmy1	12.1734	-0.00313512	0.539769	-0.00580827	0.995366	0.997339
Ankmy2	1201.44	0.765425	0.191869	3.9893	6.63e-05	0.00057382
Ankrd1	89003.5	0.403258	0.325741	1.23797	0.215726	0.348993
Ankrd10	423.54	0.189166	0.225385	0.8393	0.401301	0.54976
Ankrd11	3140.67	-0.158779	0.149158	-1.0645	0.2871	0.43108
Ankrd12	1010.58	-0.334191	0.201157	-1.66134	0.0966451	0.190752
Ankrd13a	2928.82	-0.191457	0.188615	-1.01507	0.310073	0.456186
Ankrd13b	219.474	0.0161193	0.146364	0.110131	0.912305	0.948082
Ankrd13c	1008.07	-0.161579	0.109757	-1.47215	0.140982	0.253154
Ankrd13d	81.4911	-0.748071	0.263995	-2.83366	0.00460188	0.0173086
Ankrd16	59.7579	-0.253893	0.27371	-0.927596	0.353617	0.501775
Ankrd17	2239.47	0.0927901	0.109141	0.850188	0.395221	0.543154
Ankrd2	124.817	0.410281	1.12219	0.365607	0.714658	0.813462
Ankrd23	1394.85	1.02169	0.297045	3.43952	0.000582738	0.00332789
Ankrd24	145.968	-0.633004	0.223004	-2.83853	0.00453216	0.0171103
Ankrd26	164.745	-0.0929387	0.190113	-0.48886	0.624941	0.745457
Ankrd27	547.274	-0.335914	0.149833	-2.24193	0.0249661	0.0665573
Ankrd28	592.704	0.523846	0.228796	2.28958	0.0220456	0.0603477
Ankrd29	20.453	-1.02319	0.4067	-2.51583	0.0118754	0.0370539
Ankrd33b	88.9688	-0.488921	0.21154	-2.31125	0.0208193	0.057702
Ankrd34a	68.1853	0.624731	0.2635	2.37089	0.0177451	0.0510358
Ankrd35	7.27609	0.10994	0.644605	0.170555	0.864574	0.918059
Ankrd37	29.0624	0.039843	0.422215	0.0943666	0.924818	0.955518
Ankrd39	193.659	-0.83564	0.170962	-4.88788	1.02e-06	1.81e-05
Ankrd40	2617.27	0.309198	0.0890333	3.47284	0.000514983	0.00301154
Ankrd42	88.748	-0.104068	0.199017	-0.522912	0.601035	0.725826
Ankrd44	122.929	0.683996	0.385889	1.77252	0.0763079	0.159247
Ankrd46	820.247	0.361061	0.111709	3.23215	0.00122863	0.00599433
Ankrd49	430.616	-0.389722	0.126041	-3.09202	0.001988	0.00882419
Ankrd50	1127.93	0.333018	0.108869	3.05888	0.00222165	0.00962249
Ankrd52	1509.61	0.0294148	0.184342	0.159566	0.873223	0.923995
Ankrd53	38.8211	0.275556	0.318215	0.865943	0.386521	0.534701
Ankrd54	161.642	0.126881	0.170685	0.743362	0.457262	0.602595
Ankrd55	13.167	0.616286	0.54218	1.13668	0.255671	0.395648
Ankrd6	187.725	0.747196	0.292134	2.55771	0.0105362	0.0336968
Ankrd61	9.31828	0.427399	1.01957	0.419196	0.675073	0.783118
Ankrd63	15.1202	1.01898	0.463461	2.19863	0.0279041	0.0725959
Ankrd66	2.37838	0.564556	1.587	0.355739	0.722036	NA
Ankrd9	559.186	0.594934	0.276078	2.15495	0.0311661	0.0790137
Anks1a	1930.33	0.782209	0.216028	3.62087	0.000293617	0.00191085
Anks1b	1.54428	-0.845348	1.43762	-0.58802	0.556519	NA
Anks3	359.008	-0.339554	0.147963	-2.29485	0.0217415	0.0597536
Anks4b	46.8835	-0.342837	0.45746	-0.749436	0.453595	0.599855
Anks6	130.622	-0.757506	0.193373	-3.91733	8.95e-05	0.000730662
Ankzf1	522.199	-0.210362	0.140866	-1.49335	0.135347	0.24561
Anln	187.597	-0.623291	0.549559	-1.13417	0.256725	0.39679
Ano1	239.901	0.395823	0.155602	2.54381	0.0109651	0.0348469
Ano10	1197.2	0.532837	0.165638	3.21687	0.00129597	0.00626218
Ano2	62.6545	1.26094	0.353167	3.57036	0.000356487	0.00222418
Ano3	1.97177	0.463019	1.93443	0.239356	0.810829	NA
Ano4	69.2576	-0.42786	0.329822	-1.29724	0.194547	0.322164
Ano5	92.0896	2.80424	0.371636	7.54567	4.5e-14	5.57e-12
Ano6	1699.68	-0.146935	0.237159	-0.619565	0.535544	0.672214
Ano8	525.951	-0.0494036	0.129422	-0.381725	0.702666	0.804089
Anp32a	2691.83	-0.11701	0.090087	-1.29886	0.193993	0.321407
Anp32b	3849.04	-0.899057	0.129003	-6.96928	3.19e-12	2.88e-10
Anp32e	2944.6	-0.221996	0.155813	-1.42476	0.154227	0.271198
Anpep	2064.35	-0.84822	0.370628	-2.2886	0.0221025	0.0604706
Antkmt	280.61	0.103021	0.226458	0.454924	0.649164	0.763013
Antxr1	197.832	0.512195	0.263037	1.94723	0.0515068	0.116976
Antxr2	348.025	0.705276	0.196981	3.58043	0.000343027	0.0021579
Antxrl	5.28436	-0.51881	0.826558	-0.627676	0.530216	0.667354
Anxa1	3379.07	-0.606643	0.216288	-2.8048	0.00503485	0.0186036
Anxa10	115.012	1.08194	0.554625	1.95076	0.0510857	0.116251
Anxa11	3969.64	0.24521	0.0938912	2.61164	0.00901088	0.0296858
Anxa13	1.87905	1.6567	1.6999	0.974585	0.329766	NA
Anxa2	9872.88	-0.641546	0.198238	-3.23624	0.00121115	0.00593203
Anxa3	2162.83	0.544274	0.146522	3.71462	0.000203508	0.0014291
Anxa4	2867.66	-0.581706	0.255271	-2.27878	0.0226802	0.0616271
Anxa5	5234.89	-0.0851128	0.117547	-0.724075	0.46902	0.613062
Anxa6	6017.55	0.08954	0.112194	0.798084	0.424822	0.572991
Anxa7	1872.7	-0.423445	0.192471	-2.20005	0.0278035	0.0723964
Anxa8	2.98264	3.21278	2.04336	1.5723	0.115881	NA
Aoah	49.7761	0.375994	0.521578	0.720878	0.470985	0.614407
Aoc3	2348.54	1.10934	0.272729	4.06757	4.75e-05	0.000436747
Aox1	202.875	0.790628	0.573678	1.37817	0.16815	0.288559
Aox2	1.36442	-0.156183	1.37908	-0.113252	0.909831	NA
Aox3	78.561	2.27723	0.563242	4.04307	5.28e-05	0.000476603
Ap1ar	272.754	-0.0045166	0.237191	-0.0190421	0.984808	0.991043
Ap1b1	1634.02	-0.0801716	0.149662	-0.535686	0.592175	0.71921
Ap1g2	240.963	-0.295073	0.134472	-2.1943	0.0282137	0.0732248
Ap1m1	1163.88	-0.304073	0.122662	-2.47894	0.0131772	0.0403328
Ap1m2	1.04103	-0.347058	1.88887	-0.183739	0.854218	NA
Ap1s1	1179.87	-0.66238	0.155091	-4.2709	1.95e-05	0.000206803
Ap1s2	1103.15	0.356182	0.145844	2.44222	0.0145973	0.0436618
Ap1s3	219.467	0.390172	0.2048	1.90514	0.0567615	0.126346
Ap2a1	1264.9	0.085349	0.157442	0.542097	0.587751	0.715217
Ap2a2	2562.93	-0.258802	0.225295	-1.14873	0.250669	0.390025
Ap2b1	3289.1	0.0216754	0.098787	0.219415	0.826326	0.8919
Ap2m1	5521.23	-0.284149	0.119336	-2.38109	0.0172616	0.0498158
Ap2s1	1654.61	-0.657813	0.141247	-4.65719	3.21e-06	4.69e-05
Ap3b1	1103.4	0.294279	0.114383	2.57274	0.0100896	0.0325358
Ap3b2	6.24101	-0.756266	0.779491	-0.970205	0.331944	0.478939
Ap3d1	2418.62	-0.191546	0.126728	-1.51147	0.130669	0.239418
Ap3m1	811.865	-0.128278	0.113151	-1.13369	0.256926	0.397061
Ap3m2	75.5496	0.192364	0.255749	0.752158	0.451956	0.598439
Ap3s1	533.493	-0.515086	0.169198	-3.04428	0.0023324	0.010003
Ap3s2	559.672	-0.137437	0.147827	-0.929714	0.352519	0.500579
Ap4b1	493.444	0.231802	0.124903	1.85586	0.0634741	0.137735
Ap4e1	137.845	0.544045	0.248655	2.18796	0.0286727	0.0741013
Ap4m1	157.109	-0.2022	0.182398	-1.10856	0.267619	0.409288
Ap4s1	488.223	0.125077	0.23464	0.533058	0.593993	0.720375
Ap5b1	302.296	-0.299824	0.146429	-2.04758	0.0406015	0.0972852
Ap5m1	320.34	0.42302	0.160263	2.63954	0.00830194	0.0277927
Ap5s1	136.405	0.13589	0.236602	0.574339	0.565738	0.697004
Apaf1	519.108	-0.0275606	0.209127	-0.131789	0.895151	0.938182
Apba1	62.6074	0.398138	0.336608	1.18279	0.236891	0.374331
Apba2	9.0938	0.31975	0.631049	0.506696	0.612368	0.734876
Apba3	1049.42	0.0455842	0.1146	0.397767	0.690802	0.795257
Apbb1	842.336	0.658832	0.215654	3.05504	0.00225027	0.00972544
Apbb1ip	529.925	-0.333722	0.329109	-1.01402	0.310575	0.456612
Apbb2	165.866	0.551045	0.165763	3.32429	0.000886441	0.00463151
Apbb3	325.887	-0.2024	0.234435	-0.863353	0.387943	0.53603
Apc	752.841	0.493004	0.228957	2.15326	0.0312986	0.07923
Apc2	224.506	0.775882	0.233902	3.31712	0.00090951	0.00472101
Apcdd1	122.162	0.23227	0.317133	0.732406	0.463921	0.608675
Apcdd1l	18.3217	0.334748	0.420374	0.79631	0.425852	0.573715
Apeg3	2.47227	4.45602	2.97494	1.49785	0.134172	NA
Apeh	925.214	-0.0676691	0.106203	-0.637169	0.524015	0.662363
Apex1	732.645	-0.462172	0.208277	-2.21902	0.0264855	0.0697338
Apex2	120.927	-0.257867	0.173938	-1.48252	0.138201	0.249346
Aph1a	1921.68	-0.183244	0.126275	-1.45116	0.146736	0.261189
Aph1b	769.866	-0.601873	0.151585	-3.97053	7.17e-05	0.000612672
Api5	2296.76	-0.0844331	0.17294	-0.488223	0.625392	0.745643
Apip	211.375	0.0952787	0.163696	0.582046	0.560536	0.693269
Aplf	156.068	-0.287399	0.282228	-1.01832	0.308524	0.454349
Apln	928.577	-1.74023	0.502256	-3.46482	0.000530588	0.00308726
Aplnr	2547.81	-0.522395	0.15342	-3.405	0.000661645	0.00366892
Aplp1	153.493	-0.0215415	0.157076	-0.13714	0.89092	0.935196
[truncated: 14,753 more rows]
