# Supplementary figures and images for: Acetyl-CoA production by specific metabolites promotes cardiac repair after myocardial infarction via histone acetylation
Source: eLife journal article supplement (doi:10.7554/elife.60311), 2021-12-22

Figure 1-source data 2 Original western blot figures for Figure 1J

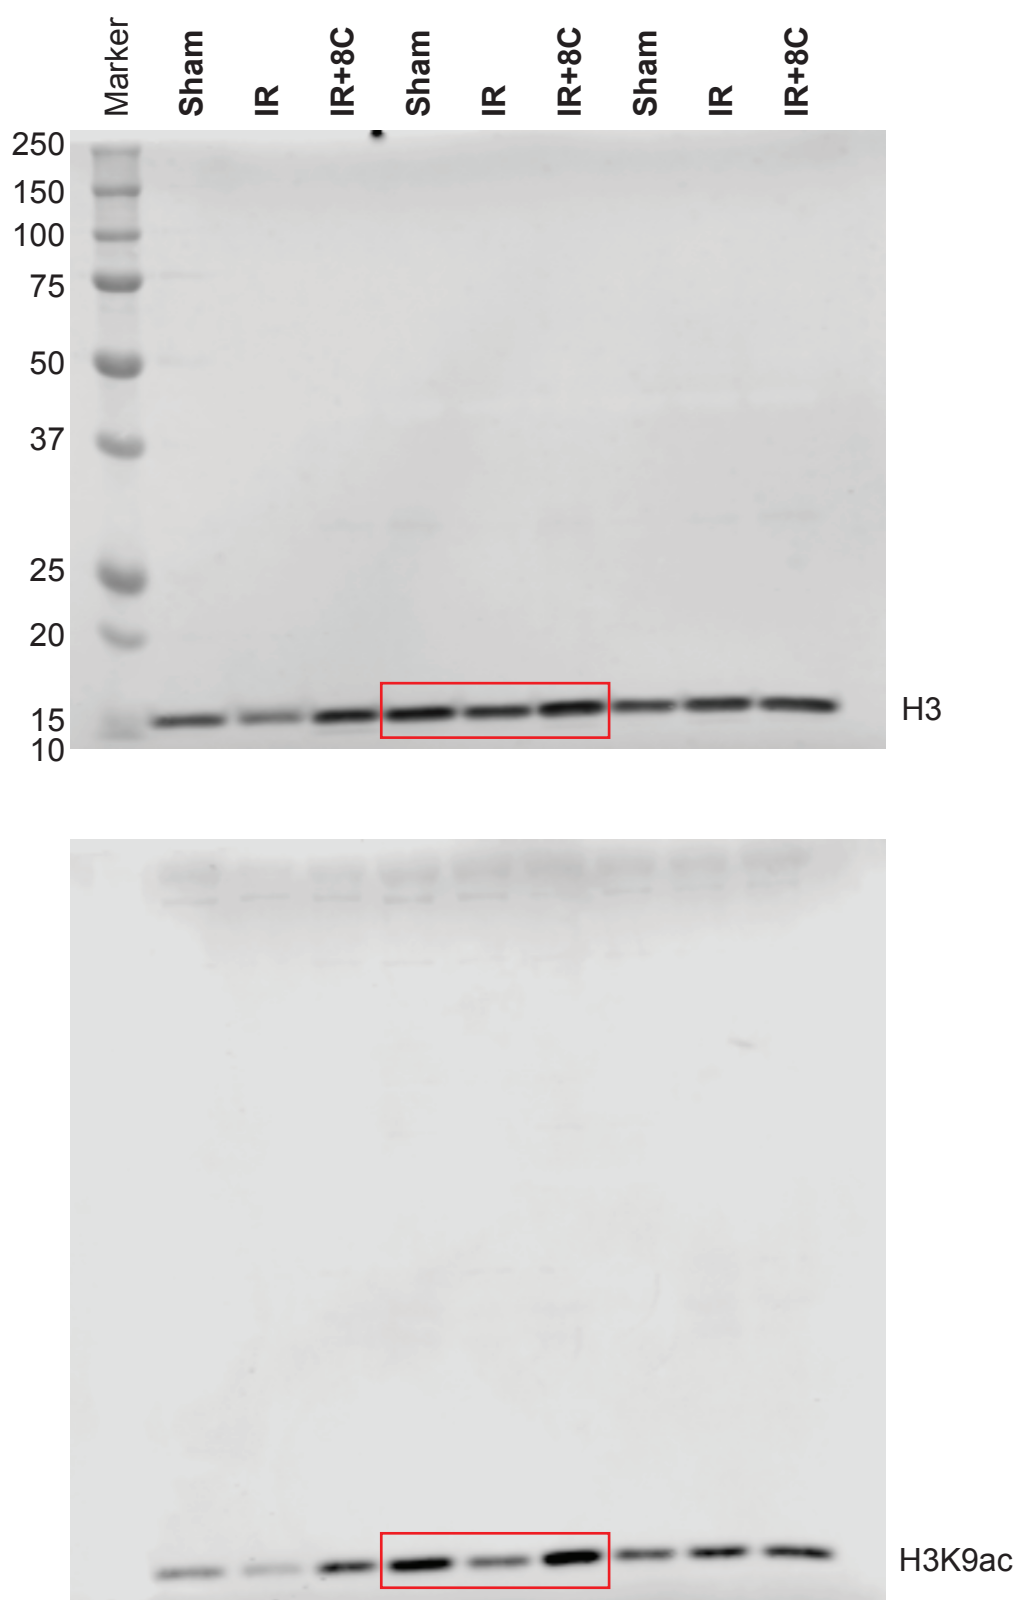

Supplement: fig1-data2 [file elife-60311-fig1-data2-v2.zip]

Figure 2-source data 2 Original western blot figures for Figure 2E

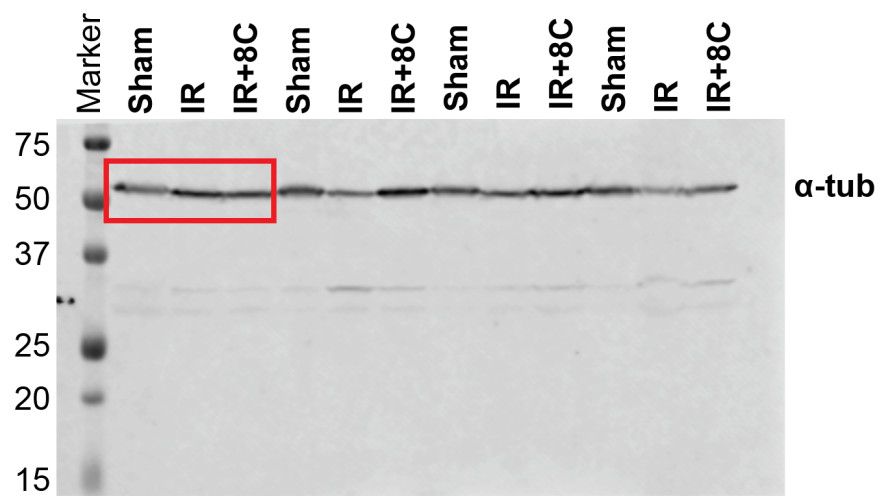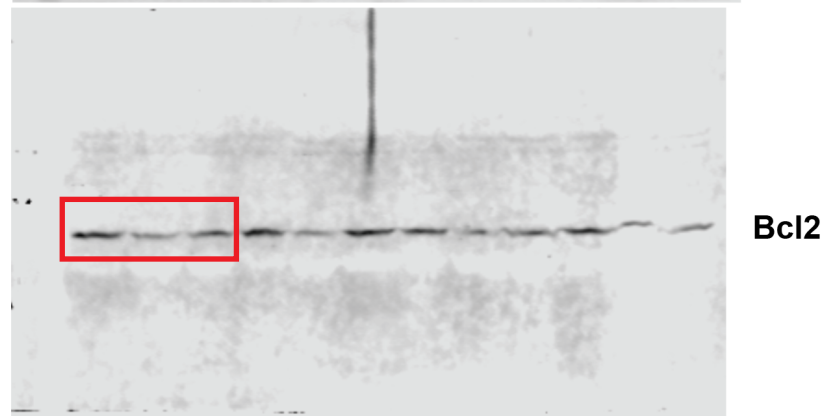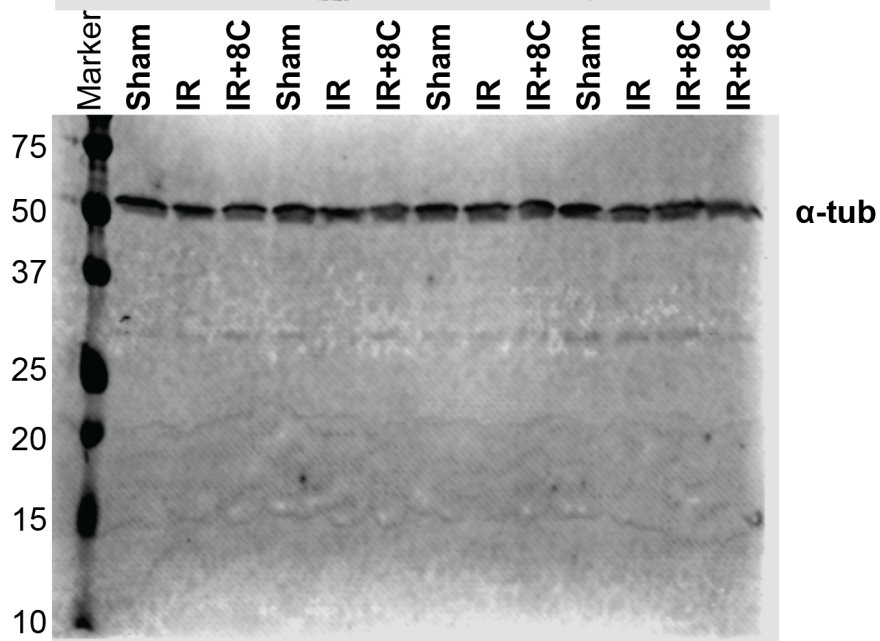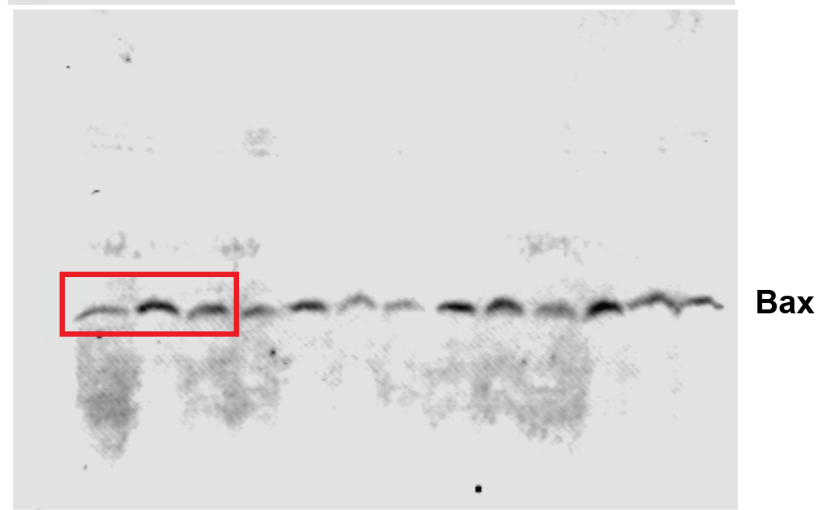

Supplement: fig2-data2 [file elife-60311-fig2-data2-v2.zip]

Figure 4-source data 2 Original western blot for Figure 4

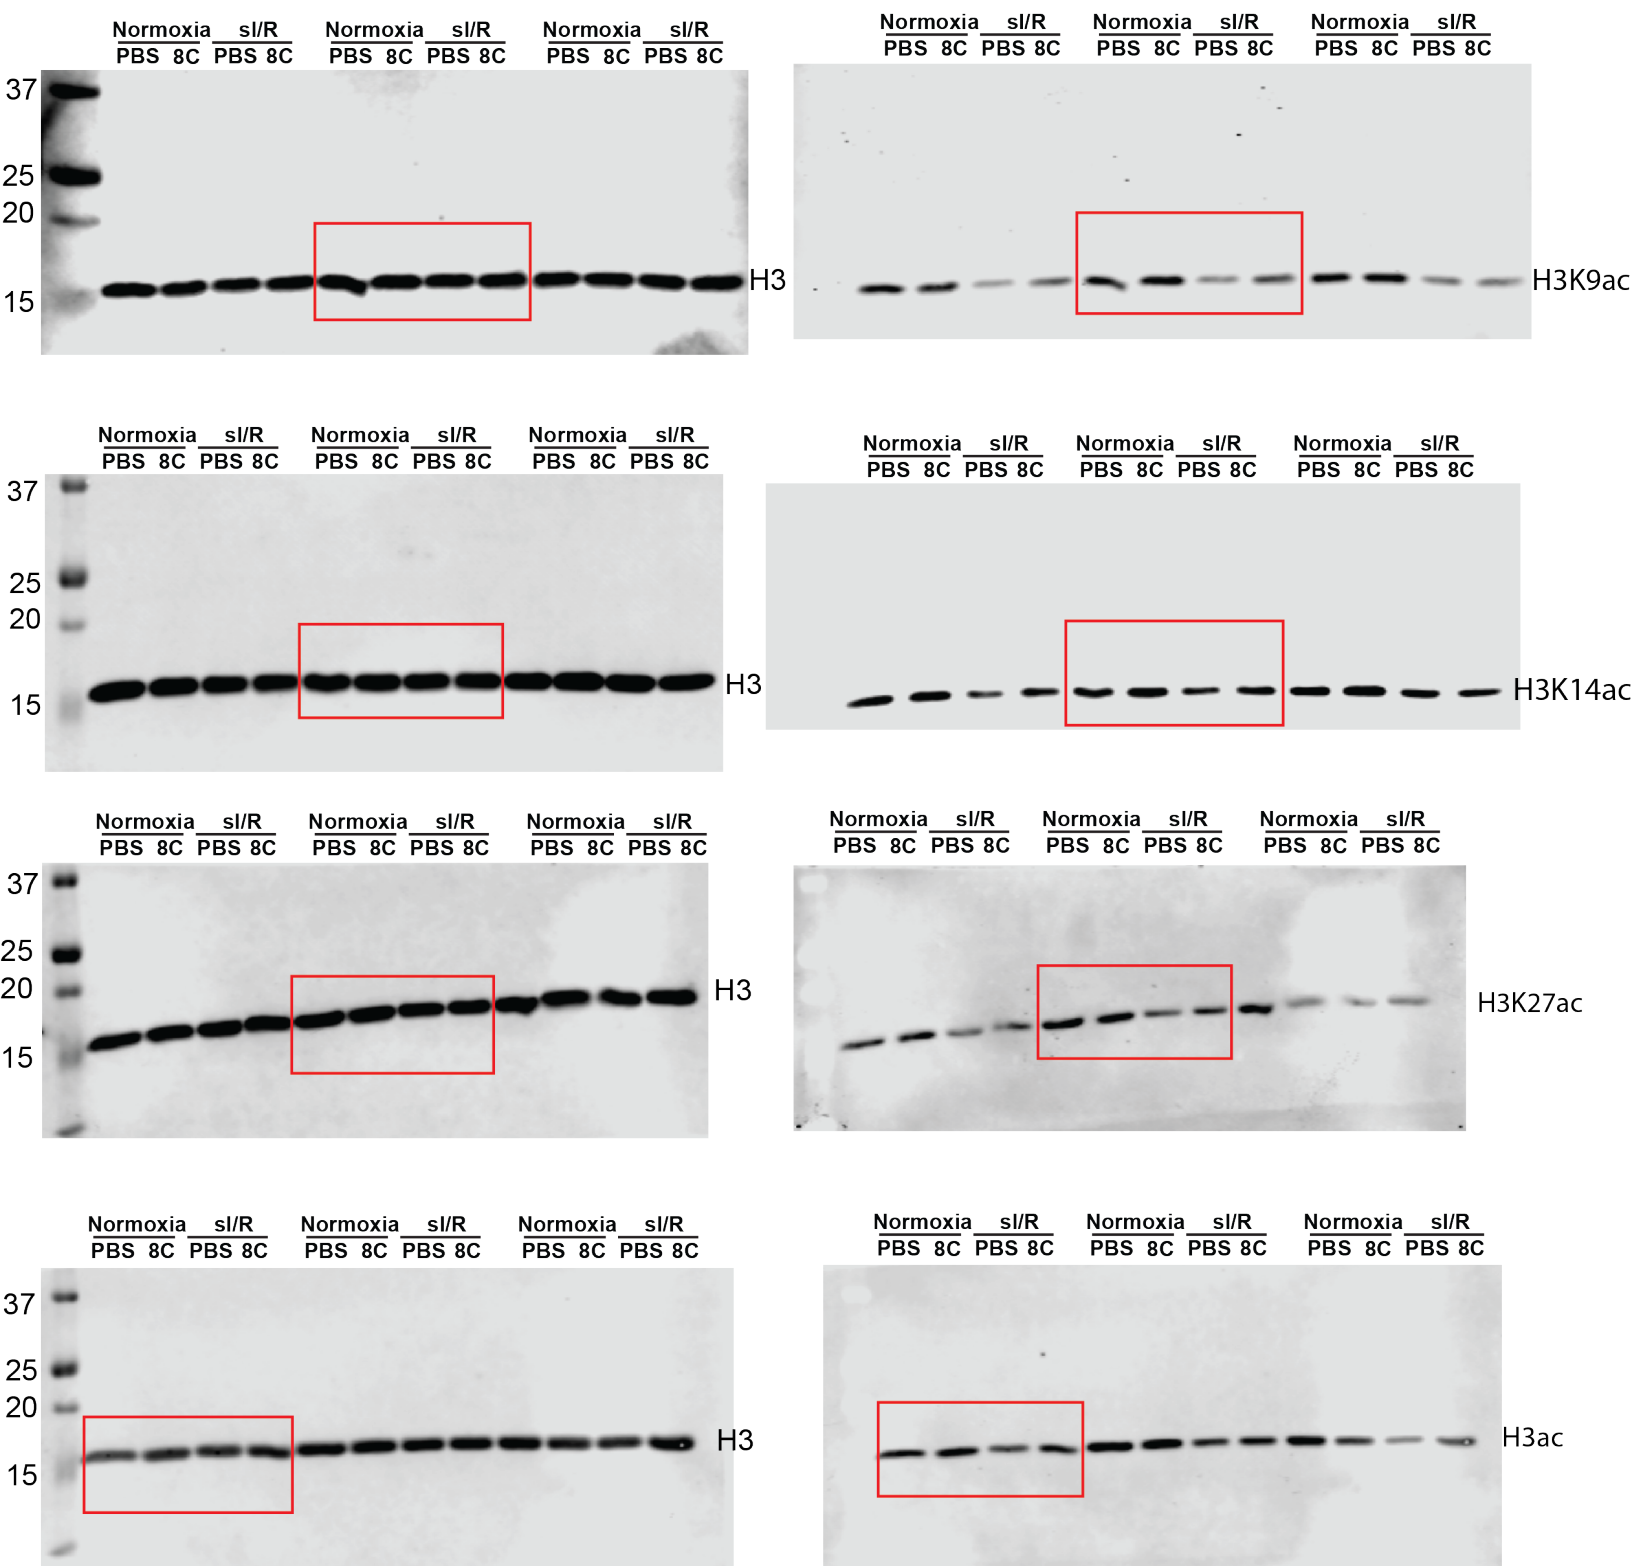

Supplement: fig4-data2 [file elife-60311-fig4-data2-v2.zip]

Figure 4-figure supplement 1- source data 1: Original blots for Figure 4-figure supplement 1

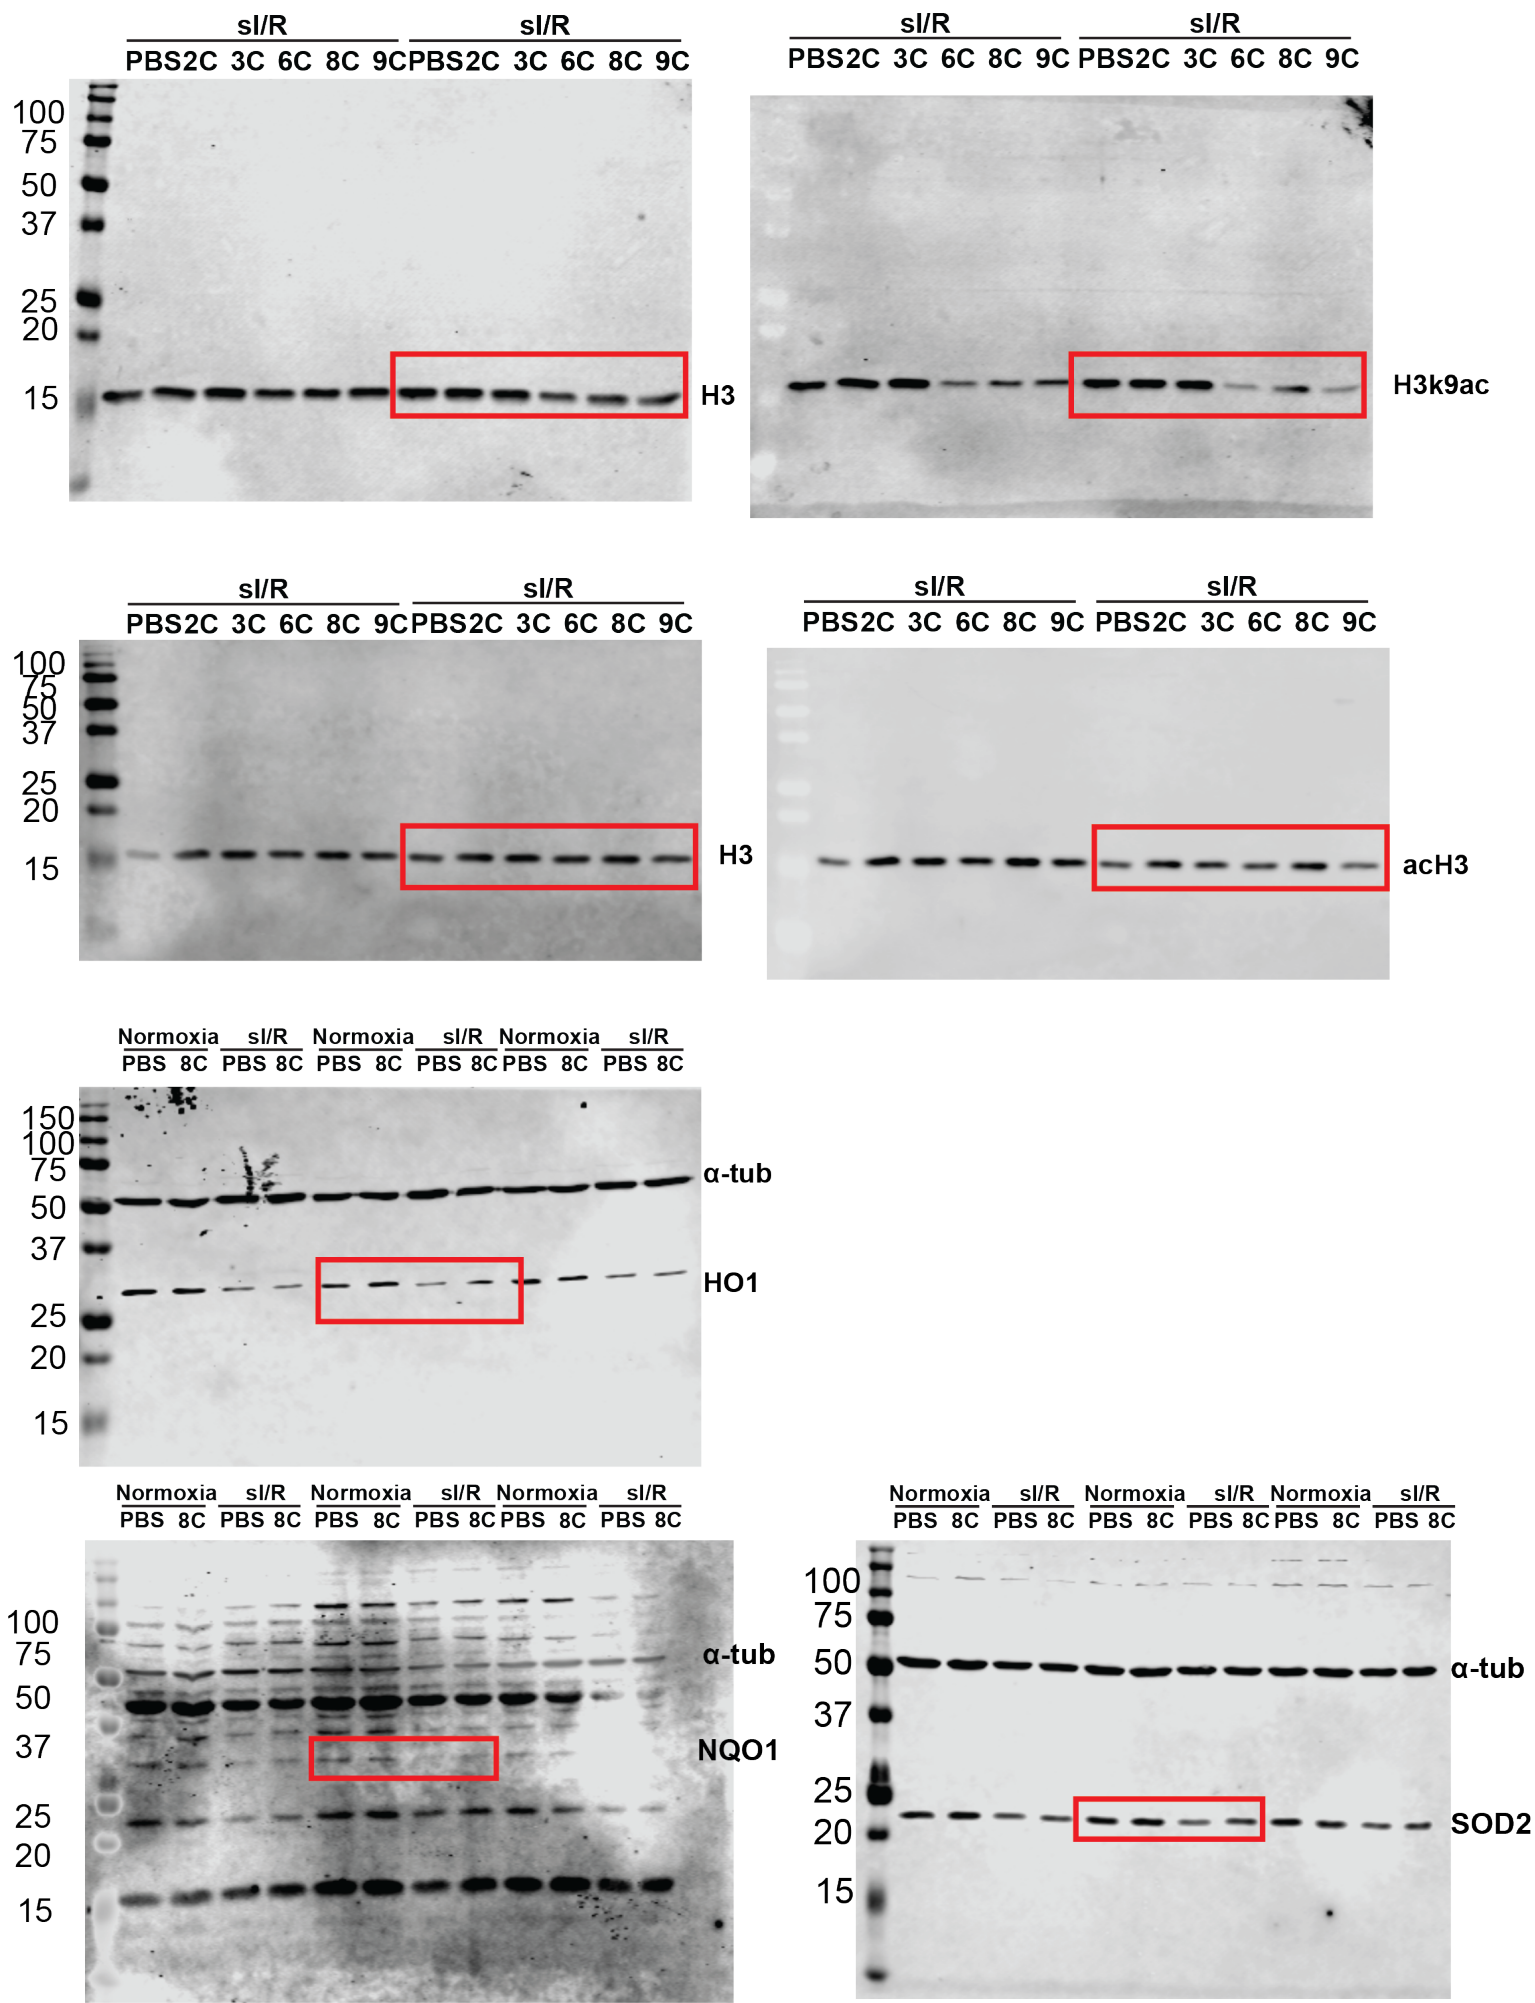

Supplement: fig4-figsupp1-data1 [file Figure 4-figures supplement source data 1.pdf › Figure 4-figure supplement 1-source data 1/Figure 4-figures supplement source data 1.pdf]

Figure 5-source data 2 Original western blots for figure 5

Figure 5 A H3K9ac

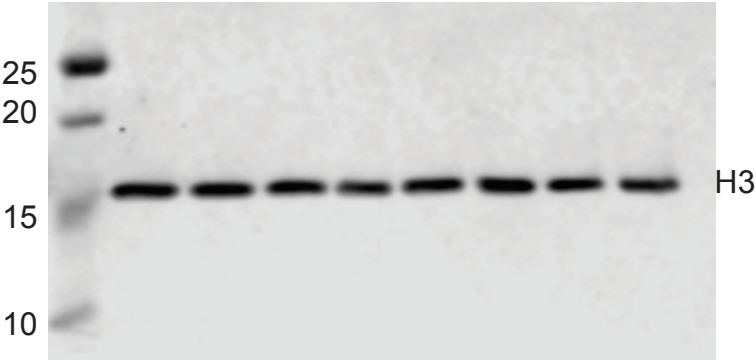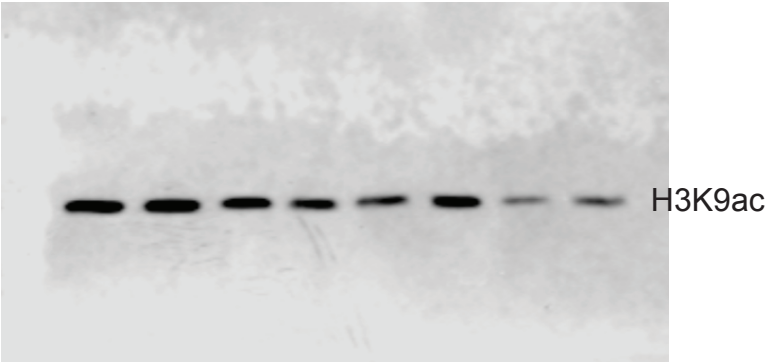

Supplement: fig5-data2 [file elife-60311-fig5-data2-v2.zip]

Figure 5-figure supplement 1- source data 1: Original blots for Figure 5-figure supplement 1

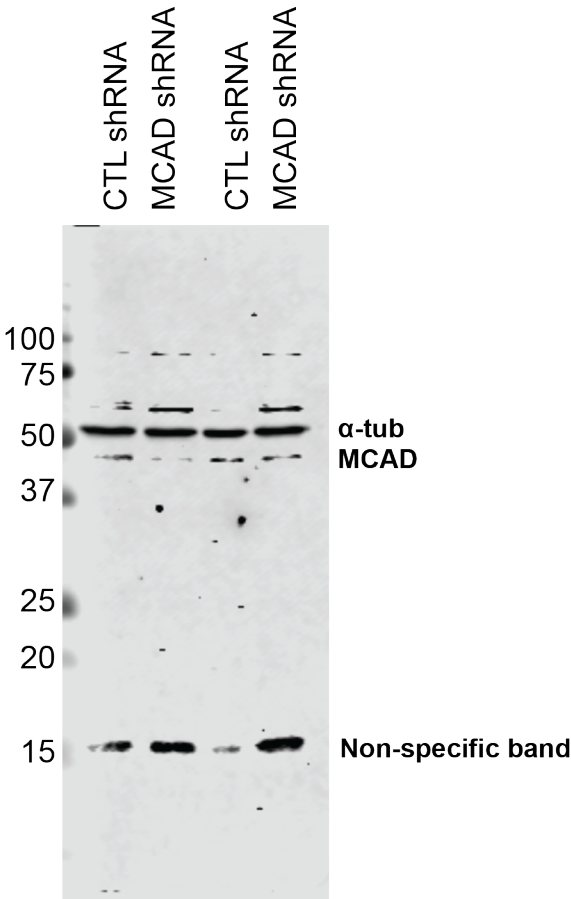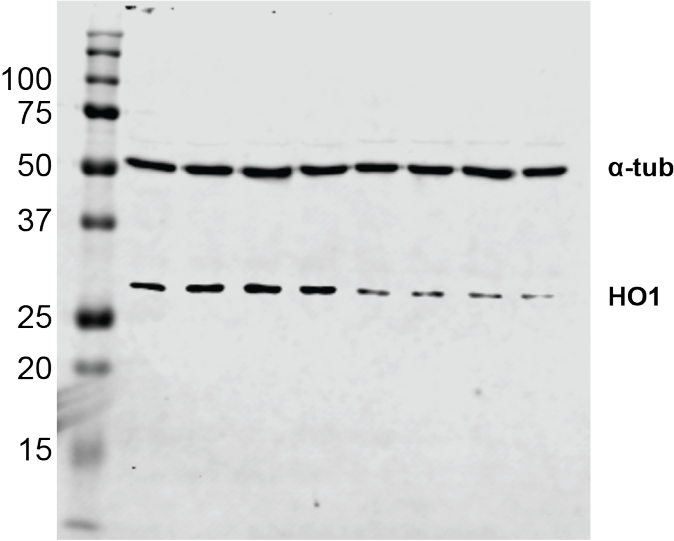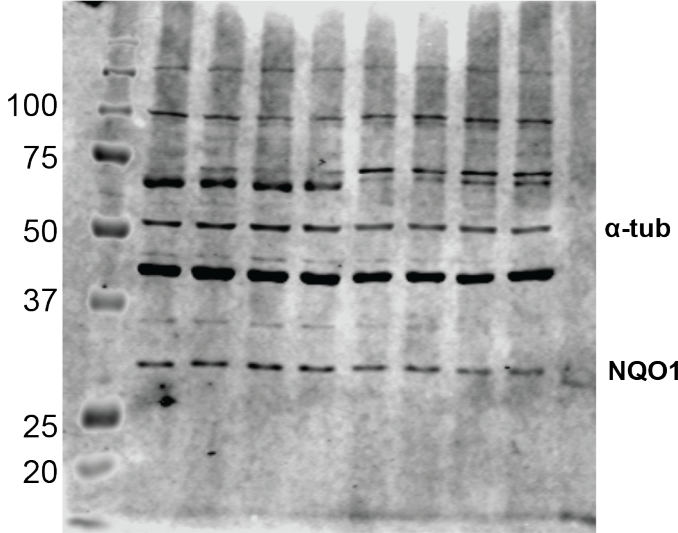

Supplement: fig5-figsupp1-data1 [file elife-60311-fig5-figsupp1-data1-v2.zip]

Figure 6-source data 2 Original western blots for figure 6

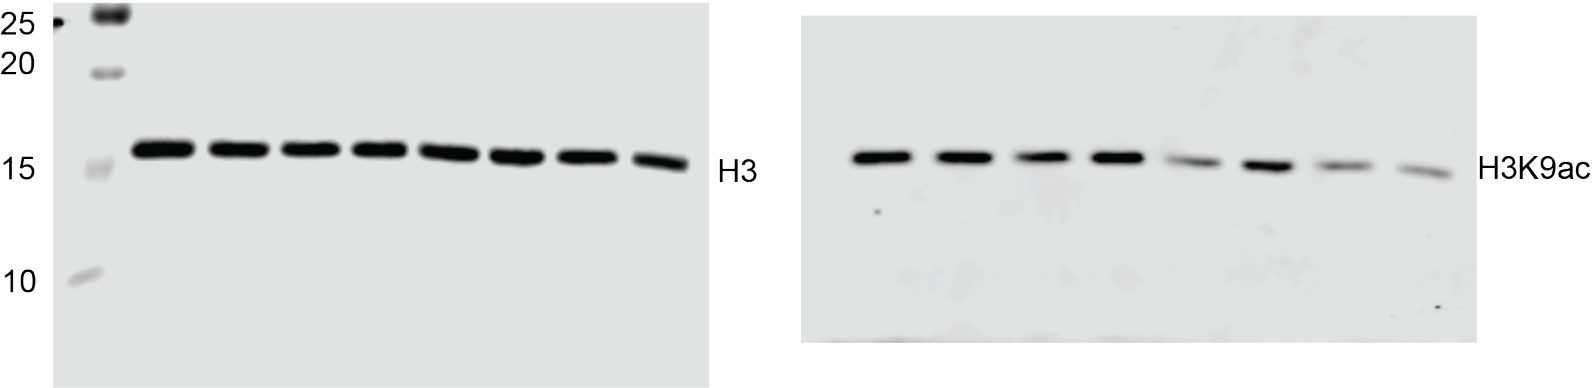

Supplement: fig6-data2 [file elife-60311-fig6-data2-v2.zip]

Figure 6-figure supplement 1- source data 1: Original blots for Figure 6-figure supplement 1

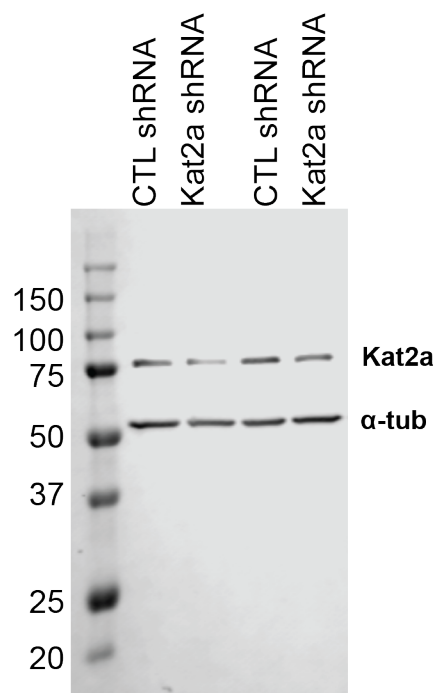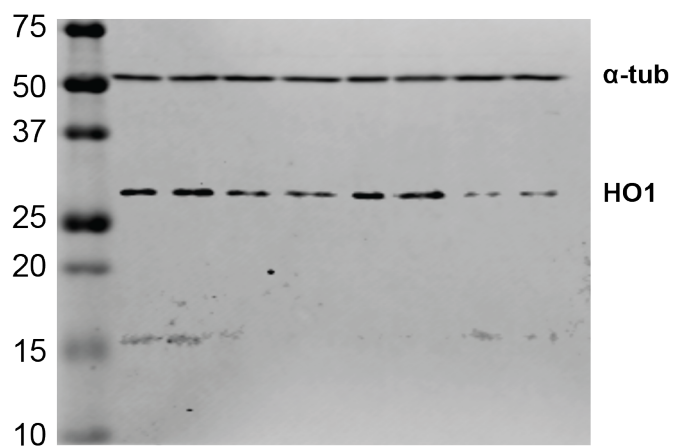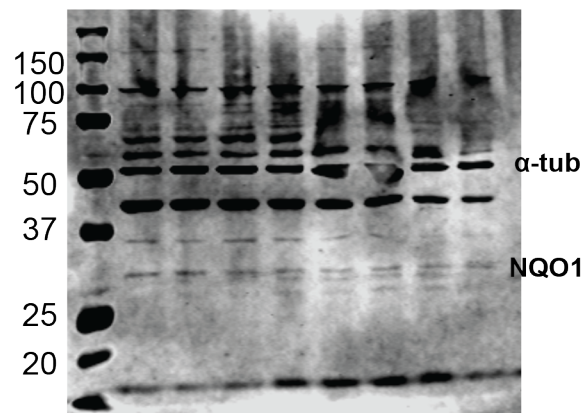

Supplement: fig6-figsupp1-data1 [file elife-60311-fig6-figsupp1-data1-v2.zip]
